# Supplementary material for: 10-years disease trajectories and genetic insights into long COVID susceptibility
Source: Research Square preprint supplement (doi:10.21203/rs.3.rs-6936765/v1), 2025-07-07
Supplement: Supplementary file 1 [file 154732809279a3cf2f645058.xlsx]

## Sheet: Sup Table S1
Table S1. Metadata from FinnGen summary statistics Release 10, and its equivalence with the selected diseases.
ICD	Description	Endpoint (FinnGen)	N cases	N controls	N total
E03	Other hypothyroidism	E4_THYROID	62464	349717	412181
E55	Vitamin D deficiency	E4_VIT_D_DEF	482	386985	387467
E66	Overweight and obesity	E4_OBESITY	23971	388084	412055
E78	Disorders of lipoprotein metabolism and other lipidemias	E4_LIPOPROT	43197	352232	395429
F17	Smoking dependency	SMOKING_DEPEND	2443	408403	410846
F32	Major depressive disorder, single episode	F5_DEPRESSIO	47696	359290	406986
F34	Persistent mood [affective] disorders	F5_PERSMOOD	7361	359290	366651
F39	Unspecified mood [affective] disorder	F5_MOODOTH	2425	359290	361715
F41	Other anxiety disorders	F5_ANXIETY	18903	368054	386957
F43	Reaction to severe stress, and adjustment disorders	F5_STRESSOTH	15226	368054	383280
F51	Sleep disorders not due to a substance or known physiol cond	F5_SLEEP_NOS	893	405229	406122
G43	Migraine	G6_MIGRAINE	20908	312803	333711
G44	Other headache syndromes	G6_HEADACHE	17484	312803	330287
G47	Sleep disorders	G6_SLEEPAPNO	43901	366484	410385
G56	Mononeuropathies of upper limb	G6_CARPTU	24766	360538	385304
H65	Nonsuppurative otitis media	H8_NONSUPPNAS	9370	384654	394024
H91	Other and unspecified hearing loss	H8_HL_NAS	2331	362353	364684
I10	Essential (primary) hypertension	I9_HYPTENSESS	102864	289117	391981
I49	Other cardiac arrhythmias	I9_OTHARR	30845	312154	342999
J30	Vasomotor and allergic rhinitis	ALLERG_RHINITIS	12240	392069	404309
J45	Asthma	ASTHMA_NAS	23834	228085	251919
K21	Gastro-esophageal reflux disease	K11_REFLUX	28859	350064	378923
K29	Gastritis and duodenitis	K11_CHRONGASTR	10317	350064	360381
K76	Other diseases of liver	K11_DISLIVOTH	5616	400247	405863
M23	Internal derangement of knee	M13_KNEEDERANGEMENTS	38748	262844	301592
M47	Spondylosis	M13_SPONDYLOSIS	21876	294770	316646
M51	Thoracic, thoracolumbar, and lumbosacral intervertebral disc disorders	M13_INTERVERTEB	41669	294770	336439
N39	Other disorders of urinary system	N14_URETHRAOTH	36263	339574	375837
N91	Absent, scanty and rare menstruation	N14_AMENORRHEAPRIM	2471	111583	114054
N92	Excessive, frequent and irregular menstruation	N14_MESNRUIRREG	40413	111583	151996

## Sheet: Sup Table S2
Table S2. Results of the association between diseases and long COVID in aggregated (Both) and sex-stratified analysis (Women and Men).
ICD	Description	Analysis	Prevalence (%)	OR	SE	CI 95% lower	CI 95% upper	P-value	Adjusted p-value	Chapter
D50	Iron deficiency anemia	Both	1.73	0.898933	0.249826	0.409284	1.38858	0.669756	0.793069	Diseases of the blood and blood-forming organs and certain disorders involving the immune mechanism
D70	Neutropenia	Both	1.43	0.771381	0.307739	0.168224	1.37454	0.398959	0.581307	Diseases of the blood and blood-forming organs and certain disorders involving the immune mechanism
D72	Other disorders of white blood cells	Both	1.29	1.05157	0.290441	0.482312	1.62082	0.862561	0.908564	Diseases of the blood and blood-forming organs and certain disorders involving the immune mechanism
E02	Subclinical iodine-deficiency hypothyroidism	Both	2.88	1.05339	0.187276	0.686332	1.42044	0.781229	0.857181	Endocrine, nutritional and metabolic diseases
E03	Other hypothyroidism	Both	7.49	1.35576	0.112702	1.13487	1.57665	0.00692207	0.0321673	Endocrine, nutritional and metabolic diseases
E04	Other nontoxic goiter	Both	3.68	1.09202	0.165108	0.768412	1.41562	0.593929	0.75678	Endocrine, nutritional and metabolic diseases
E05	Thyrotoxicosis [hyperthyroidism]	Both	1.67	1.21336	0.232095	0.75846	1.66826	0.404707	0.581307	Endocrine, nutritional and metabolic diseases
E06	Thyroiditis	Both	1.26	1.26164	0.26259	0.746973	1.77631	0.376115	0.560625	Endocrine, nutritional and metabolic diseases
E11	Type 2 diabetes mellitus	Both	3.85	1.35254	0.172541	1.01437	1.69071	0.0800812	0.186071	Endocrine, nutritional and metabolic diseases
E55	Vitamin D deficiency	Both	3.48	1.22154	0.167603	0.893047	1.55004	0.232486	0.427126	Endocrine, nutritional and metabolic diseases
E66	Overweight and obesity	Both	19.83	1.28224	0.0806367	1.12419	1.44028	0.00204903	0.0115624	Endocrine, nutritional and metabolic diseases
E78	Disorders of lipoprotein metabolism and other lipidemias	Both	28.12	1.2122	0.0770809	1.06112	1.36327	0.0125422	0.0450379	Endocrine, nutritional and metabolic diseases
F10	Alcohol related disorders	Both	1.67	1.08446	0.278371	0.538863	1.63006	0.77084	0.857181	Mental, Behavioral and Neurodevelopmental disorders
F17	Nicotine dependence	Both	21.37	1.09758	0.0802035	0.94038	1.25477	0.245703	0.441149	Mental, Behavioral and Neurodevelopmental disorders
F18	Inhalant related disorders	Both	3.48	1.08579	0.180543	0.731933	1.43965	0.648467	0.793069	Mental, Behavioral and Neurodevelopmental disorders
F32	Major depressive disorder, single episode	Both	10.33	1.48377	0.0978669	1.29195	1.67559	5.53362e-05	0.000485729	Mental, Behavioral and Neurodevelopmental disorders
F33	Major depressive disorder, recurrent	Both	1.47	1.1554	0.25889	0.647988	1.66282	0.576876	0.747102	Mental, Behavioral and Neurodevelopmental disorders
F34	Persistent mood [affective] disorders	Both	6.5	1.26892	0.123749	1.02638	1.51147	0.0542787	0.147863	Mental, Behavioral and Neurodevelopmental disorders
F39	Unspecified mood [affective] disorder	Both	4.94	1.54036	0.132988	1.27971	1.80102	0.00115999	0.00916395	Mental, Behavioral and Neurodevelopmental disorders
F40	Phobic anxiety disorders	Both	1.36	0.914369	0.298391	0.329535	1.4992	0.764168	0.857181	Mental, Behavioral and Neurodevelopmental disorders
F41	Other anxiety disorders	Both	28.13	1.50382	0.0705997	1.36544	1.64219	7.50747e-09	5.9309e-07	Mental, Behavioral and Neurodevelopmental disorders
F43	Reaction to severe stress, and adjustment disorders	Both	7.15	1.60086	0.110993	1.38331	1.8184	2.24158e-05	0.000221356	Mental, Behavioral and Neurodevelopmental disorders
F45	Somatoform disorders	Both	1.17	1.32421	0.277698	0.779937	1.86849	0.311901	0.492804	Mental, Behavioral and Neurodevelopmental disorders
F51	Sleep disorders not due to a substance or known physiol cond	Both	6.97	1.22683	0.123666	0.984446	1.46921	0.0983119	0.21574	Mental, Behavioral and Neurodevelopmental disorders
F52	Sexual dysfnct not due to a substance or known physiol cond	Both	2.09	1.19485	0.262922	0.679535	1.71017	0.498346	0.678781	Mental, Behavioral and Neurodevelopmental disorders
F60	Specific personality disorders	Both	1.3	1.389	0.262235	0.87503	1.90297	0.210199	0.395375	Mental, Behavioral and Neurodevelopmental disorders
G43	Migraine	Both	7.89	1.62041	0.105312	1.414	1.82682	4.57696e-06	7.83571e-05	Diseases of the nervous system
G44	Other headache syndromes	Both	3.69	1.58516	0.149262	1.29261	1.87771	0.00202577	0.0115624	Diseases of the nervous system
G47	Sleep disorders	Both	4.06	1.47454	0.164093	1.15293	1.79616	0.0179506	0.0616565	Diseases of the nervous system
G56	Mononeuropathies of upper limb	Both	6.96	1.40871	0.116749	1.17988	1.63753	0.00333423	0.0164628	Diseases of the nervous system
G57	Mononeuropathies of lower limb	Both	1.75	1.41291	0.227815	0.966399	1.85942	0.129206	0.275873	Diseases of the nervous system
H25	Age-related cataract	Both	2.31	0.9567	0.237894	0.490436	1.42296	0.852388	0.908564	Diseases of the eye and adnexa
H26	Other cataract	Both	1.36	1.13743	0.291153	0.566778	1.70808	0.658293	0.793069	Diseases of the eye and adnexa
H40	Glaucoma	Both	3.2	0.726147	0.222741	0.289582	1.16271	0.150815	0.313536	Diseases of the eye and adnexa
H43	Disorders of vitreous body	Both	1.96	1.44391	0.220405	1.01192	1.87589	0.095571	0.215718	Diseases of the eye and adnexa
H54	Blindness and low vision	Both	5.88	0.990736	0.144014	0.708475	1.273	0.948474	0.960633	Diseases of the eye and adnexa
H60	Otitis externa	Both	8.35	1.27953	0.111997	1.06002	1.49904	0.0277441	0.0913242	Diseases of the ear and mastoid process
H65	Nonsuppurative otitis media	Both	1.96	1.65594	0.201533	1.26095	2.05094	0.0123261	0.0450379	Diseases of the ear and mastoid process
H90	Conductive and sensorineural hearing loss	Both	1.42	1.3458	0.260449	0.835324	1.85627	0.25417	0.44621	Diseases of the ear and mastoid process
H91	Other and unspecified hearing loss	Both	7.52	1.3733	0.11852	1.141	1.60559	0.0074407	0.0326564	Diseases of the ear and mastoid process
I10	Essential (primary) hypertension	Both	19.11	1.20246	0.089623	1.0268	1.37812	0.0396702	0.116072	Diseases of the circulatory system
I13	Hypertensive heart and chronic kidney disease	Both	1.73	1.22522	0.22403	0.786125	1.66431	0.364592	0.560625	Diseases of the circulatory system
I45	Other conduction disorders	Both	1.79	1.11322	0.26234	0.599048	1.6274	0.682642	0.793069	Diseases of the circulatory system
I49	Other cardiac arrhythmias	Both	2.49	1.75783	0.184763	1.3957	2.11996	0.00226566	0.0119325	Diseases of the circulatory system
J30	Vasomotor and allergic rhinitis	Both	13.84	1.49367	0.0878644	1.32145	1.66588	4.95931e-06	7.83571e-05	Diseases of the respiratory system
J31	Chronic rhinitis, nasopharyngitis and pharyngitis	Both	1.63	1.35721	0.236932	0.892829	1.82158	0.197364	0.380286	Diseases of the respiratory system
J32	Chronic sinusitis	Both	1.3	1.24547	0.268004	0.720188	1.77074	0.412756	0.582281	Diseases of the respiratory system
J44	Other chronic obstructive pulmonary disease	Both	1.5	1.05903	0.279662	0.510903	1.60716	0.837507	0.906343	Diseases of the respiratory system
J45	Asthma	Both	6.16	1.75848	0.117379	1.52842	1.98854	1.5186e-06	5.99846e-05	Diseases of the respiratory system
K05	Gingivitis and periodontal diseases	Both	1.27	1.42173	0.268901	0.894696	1.94877	0.19068	0.376592	Diseases of the digestive system
K08	Other disorders of teeth and supporting structures	Both	1.19	1.70832	0.259682	1.19935	2.21729	0.0391906	0.116072	Diseases of the digestive system
K21	Gastro-esophageal reflux disease	Both	5.86	1.72836	0.125077	1.48322	1.97351	1.21606e-05	0.000160115	Diseases of the digestive system
K29	Gastritis and duodenitis	Both	1.92	1.88564	0.200236	1.49318	2.27809	0.00153703	0.0104097	Diseases of the digestive system
K57	Diverticular disease of intestine	Both	3	1.39352	0.186693	1.02761	1.75943	0.075499	0.186071	Diseases of the digestive system
K58	Irritable bowel syndrome	Both	1.77	1.48769	0.220367	1.05578	1.9196	0.0714563	0.182098	Diseases of the digestive system
K76	Other diseases of liver	Both	4.72	1.46876	0.145191	1.18419	1.75333	0.00810431	0.0336969	Diseases of the digestive system
L20	Atopic dermatitis	Both	3.1	1.09073	0.183892	0.730307	1.45115	0.636736	0.793069	Diseases of the skin and subcutaneous tissue
L40	Psoriasis	Both	3.44	1.2552	0.171682	0.918713	1.59169	0.185522	0.3758	Diseases of the skin and subcutaneous tissue
L71	Rosacea	Both	1.17	0.878239	0.311874	0.266976	1.4895	0.677182	0.793069	Diseases of the skin and subcutaneous tissue
M10	Gout	Both	1.55	0.989004	0.321056	0.359746	1.61826	0.972526	0.972526	Diseases of the musculoskeletal system and connective tissue
M12	Other and unspecified arthropathy	Both	3.27	0.979506	0.187474	0.612063	1.34695	0.912051	0.935741	Diseases of the musculoskeletal system and connective tissue
M13	Other arthritis	Both	2.24	1.02623	0.22267	0.589804	1.46266	0.907433	0.935741	Diseases of the musculoskeletal system and connective tissue
M15	Polyosteoarthritis	Both	1.27	1.31745	0.269523	0.789189	1.8457	0.306357	0.492804	Diseases of the musculoskeletal system and connective tissue
M16	Osteoarthritis of hip	Both	2.1	1.15499	0.237945	0.688624	1.62135	0.544807	0.71733	Diseases of the musculoskeletal system and connective tissue
M17	Osteoarthritis of knee	Both	4.39	1.19735	0.160794	0.882204	1.5125	0.262647	0.451068	Diseases of the musculoskeletal system and connective tissue
M18	Osteoarthritis of first carpometacarpal joint	Both	2.02	1.46765	0.209554	1.05693	1.87837	0.067122	0.176755	Diseases of the musculoskeletal system and connective tissue
M19	Other and unspecified osteoarthritis	Both	4.48	1.10363	0.158784	0.792422	1.41484	0.534588	0.715804	Diseases of the musculoskeletal system and connective tissue
M20	Acquired deformities of fingers and toes	Both	4.97	1.172	0.144014	0.889734	1.45426	0.270446	0.45458	Diseases of the musculoskeletal system and connective tissue
M22	Disorder of patella	Both	2.8	1.06753	0.199736	0.676059	1.45901	0.743526	0.851284	Diseases of the musculoskeletal system and connective tissue
M23	Internal derangement of knee	Both	7.32	1.36016	0.1219	1.12124	1.59908	0.011623	0.0450379	Diseases of the musculoskeletal system and connective tissue
M41	Scoliosis	Both	2.84	1.14477	0.187413	0.777449	1.5121	0.470645	0.652298	Diseases of the musculoskeletal system and connective tissue
M47	Spondylosis	Both	3.41	1.65336	0.159149	1.34143	1.96528	0.00158123	0.0104097	Diseases of the musculoskeletal system and connective tissue
M50	Cervical disc disorders	Both	2.02	1.50959	0.203153	1.11142	1.90777	0.042638	0.1203	Diseases of the musculoskeletal system and connective tissue
M51	Thoracic, thoracolum, and lumbosacral intvrt disc disorders	Both	7.46	1.68435	0.11118	1.46644	1.90226	2.73829e-06	7.21083e-05	Diseases of the musculoskeletal system and connective tissue
M81	Osteoporosis without current pathological fracture	Both	3.48	0.842081	0.193998	0.461852	1.22231	0.375626	0.560625	Diseases of the musculoskeletal system and connective tissue
N39	Other disorders of urinary system	Both	1.79	2.2695	0.189727	1.89764	2.64136	1.56256e-05	0.000176345	Diseases of the genitourinary system
Q40	Other congenital malformations of upper alimentary tract	Both	1.75	1.61545	0.224476	1.17548	2.05541	0.0326314	0.103115	Congenital malformations, deformations and chromosomal abnormalities
R32	Unspecified urinary incontinence	Both	2.76	1.36588	0.177279	1.01842	1.71334	0.0786073	0.186071	Symptoms, signs and abnormal clinical and laboratory findings, not elsewhere classified
Z96	Presence of other functional implants	Both	1.32	1.33675	0.275439	0.796895	1.8766	0.292007	0.480594	Factors influencing health status and contact with health services
C50	Malignant neoplasm of breast	Women	1.85	1.24335	0.279039	0.696444	1.79026	0.435055	0.638097	Neoplasms
D50	Iron deficiency anemia	Women	2.61	0.973351	0.252349	0.478757	1.46795	0.91476	0.973387	Diseases of the blood and blood-forming organs and certain disorders involving the immune mechanism
D70	Neutropenia	Women	1.56	0.851327	0.342101	0.180821	1.52183	0.637998	0.764792	Diseases of the blood and blood-forming organs and certain disorders involving the immune mechanism
D72	Other disorders of white blood cells	Women	1.4	0.749984	0.378892	0.00736866	1.4926	0.447657	0.638097	Diseases of the blood and blood-forming organs and certain disorders involving the immune mechanism
E02	Subclinical iodine-deficiency hypothyroidism	Women	4.21	0.980166	0.202089	0.584079	1.37625	0.921033	0.973387	Endocrine, nutritional and metabolic diseases
E03	Other hypothyroidism	Women	11.14	1.38907	0.11788	1.15803	1.62011	0.00530513	0.037544	Endocrine, nutritional and metabolic diseases
E04	Other nontoxic goiter	Women	5.54	1.10392	0.171824	0.767155	1.44069	0.565007	0.721953	Endocrine, nutritional and metabolic diseases
E05	Thyrotoxicosis [hyperthyroidism]	Women	2.5	1.12306	0.248215	0.636566	1.60955	0.640098	0.764792	Endocrine, nutritional and metabolic diseases
E06	Thyroiditis	Women	1.87	1.29994	0.272331	0.766178	1.83369	0.335436	0.593463	Endocrine, nutritional and metabolic diseases
E11	Type 2 diabetes mellitus	Women	2.48	1.53268	0.23325	1.07552	1.98984	0.0671413	0.199258	Endocrine, nutritional and metabolic diseases
E28	Ovarian dysfunction	Women	2.09	0.771262	0.300333	0.18262	1.3599	0.38715	0.634337	Endocrine, nutritional and metabolic diseases
E55	Vitamin D deficiency	Women	4.76	1.24744	0.179549	0.895527	1.59935	0.218186	0.446069	Endocrine, nutritional and metabolic diseases
E66	Overweight and obesity	Women	19.41	1.28059	0.0970697	1.09034	1.47084	0.0108383	0.0603371	Endocrine, nutritional and metabolic diseases
E78	Disorders of lipoprotein metabolism and other lipidemias	Women	25.38	1.17403	0.0949474	0.98794	1.36013	0.0910604	0.237175	Endocrine, nutritional and metabolic diseases
E89	Postproc endocrine and metabolic comp and disorders, NEC	Women	1.01	0.659353	0.474102	-0.269869	1.58858	0.379675	0.634337	Endocrine, nutritional and metabolic diseases
F17	Nicotine dependence	Women	21.15	1.04807	0.0969705	0.858013	1.23813	0.628253	0.764792	Mental, Behavioral and Neurodevelopmental disorders
F18	Inhalant related disorders	Women	3.24	1.17261	0.215491	0.750252	1.59496	0.459957	0.638097	Mental, Behavioral and Neurodevelopmental disorders
F32	Major depressive disorder, single episode	Women	13.17	1.50911	0.108802	1.29587	1.72236	0.000155374	0.00158827	Mental, Behavioral and Neurodevelopmental disorders
F33	Major depressive disorder, recurrent	Women	1.74	1.02068	0.304302	0.424261	1.6171	0.946366	0.973387	Mental, Behavioral and Neurodevelopmental disorders
F34	Persistent mood [affective] disorders	Women	8.25	1.32521	0.135732	1.05918	1.59124	0.0380369	0.152147	Mental, Behavioral and Neurodevelopmental disorders
F39	Unspecified mood [affective] disorder	Women	6.34	1.51768	0.147659	1.22827	1.80709	0.00472343	0.036213	Mental, Behavioral and Neurodevelopmental disorders
F40	Phobic anxiety disorders	Women	1.35	0.990184	0.346063	0.311913	1.66845	0.977259	0.977259	Mental, Behavioral and Neurodevelopmental disorders
F41	Other anxiety disorders	Women	33.89	1.51546	0.0818109	1.35512	1.67581	3.74513e-07	1.72276e-05	Mental, Behavioral and Neurodevelopmental disorders
F43	Reaction to severe stress, and adjustment disorders	Women	8.9	1.68404	0.12313	1.4427	1.92537	2.30735e-05	0.000423299	Mental, Behavioral and Neurodevelopmental disorders
F45	Somatoform disorders	Women	1.33	1.50482	0.304901	0.907221	2.10241	0.180135	0.404206	Mental, Behavioral and Neurodevelopmental disorders
F50	Eating disorders	Women	1.07	1.59526	0.332387	0.943791	2.24672	0.159993	0.37742	Mental, Behavioral and Neurodevelopmental disorders
F51	Sleep disorders not due to a substance or known physiol cond	Women	7.86	0.978303	0.152204	0.679989	1.27662	0.885404	0.973387	Mental, Behavioral and Neurodevelopmental disorders
F60	Specific personality disorders	Women	1.31	1.69675	0.298224	1.11225	2.28126	0.0762476	0.219212	Mental, Behavioral and Neurodevelopmental disorders
G25	Other extrapyramidal and movement disorders	Women	1.13	1.12464	0.367244	0.404852	1.84442	0.749088	0.863132	Diseases of the nervous system
G43	Migraine	Women	11.08	1.61475	0.113543	1.39221	1.83729	2.4403e-05	0.000423299	Diseases of the nervous system
G44	Other headache syndromes	Women	4.64	1.33883	0.173428	0.998921	1.67875	0.0924651	0.237175	Diseases of the nervous system
G47	Sleep disorders	Women	2.13	1.25223	0.263325	0.736119	1.76833	0.393013	0.634337	Diseases of the nervous system
G56	Mononeuropathies of upper limb	Women	9.13	1.38666	0.128803	1.13421	1.63911	0.0111492	0.0603371	Diseases of the nervous system
G57	Mononeuropathies of lower limb	Women	2.01	1.35358	0.264999	0.834191	1.87297	0.25326	0.475367	Diseases of the nervous system
H25	Age-related cataract	Women	2.56	1.11652	0.262834	0.601376	1.63167	0.674963	0.79611	Diseases of the eye and adnexa
H26	Other cataract	Women	1.35	1.0171	0.363607	0.304443	1.72976	0.962807	0.973387	Diseases of the eye and adnexa
H35	Other retinal disorders	Women	1.03	1.55527	0.357578	0.854427	2.25611	0.216791	0.446069	Diseases of the eye and adnexa
H40	Glaucoma	Women	3.06	0.630499	0.285262	0.0713961	1.1896	0.105898	0.263313	Diseases of the eye and adnexa
H43	Disorders of vitreous body	Women	2.3	1.22369	0.263304	0.707626	1.73976	0.443265	0.638097	Diseases of the eye and adnexa
H54	Blindness and low vision	Women	5.99	0.91436	0.17555	0.570288	1.25843	0.61005	0.764792	Diseases of the eye and adnexa
H60	Otitis externa	Women	8.6	1.31867	0.132129	1.0597	1.57764	0.0362977	0.15179	Diseases of the ear and mastoid process
H65	Nonsuppurative otitis media	Women	2.34	1.78791	0.224411	1.34807	2.22774	0.00961983	0.0603371	Diseases of the ear and mastoid process
H90	Conductive and sensorineural hearing loss	Women	1.4	1.51532	0.303255	0.920949	2.10969	0.170516	0.392188	Diseases of the ear and mastoid process
H91	Other and unspecified hearing loss	Women	6.89	1.34584	0.147307	1.05712	1.63456	0.0437669	0.161062	Diseases of the ear and mastoid process
I10	Essential (primary) hypertension	Women	14.24	1.23961	0.114505	1.01518	1.46403	0.0606756	0.194915	Diseases of the circulatory system
I13	Hypertensive heart and chronic kidney disease	Women	2.67	1.18652	0.233847	0.728189	1.64485	0.464562	0.638097	Diseases of the circulatory system
I45	Other conduction disorders	Women	1.07	0.76981	0.436675	-0.0860571	1.62568	0.549106	0.711518	Diseases of the circulatory system
I49	Other cardiac arrhythmias	Women	2.17	2.10064	0.224607	1.66042	2.54087	0.00095103	0.00874947	Diseases of the circulatory system
J30	Vasomotor and allergic rhinitis	Women	14.03	1.72415	0.102607	1.52304	1.92525	1.10288e-07	1.01465e-05	Diseases of the respiratory system
J31	Chronic rhinitis, nasopharyngitis and pharyngitis	Women	1.76	1.01456	0.304165	0.418412	1.61072	0.962084	0.973387	Diseases of the respiratory system
J32	Chronic sinusitis	Women	1.56	1.38916	0.291353	0.818116	1.9602	0.259245	0.475367	Diseases of the respiratory system
J44	Other chronic obstructive pulmonary disease	Women	1.42	0.78818	0.379094	0.0451704	1.53119	0.530077	0.696673	Diseases of the respiratory system
J45	Asthma	Women	6.5	1.87108	0.137823	1.60095	2.14121	5.47258e-06	0.000167826	Diseases of the respiratory system
K05	Gingivitis and periodontal diseases	Women	1.17	1.36446	0.338508	0.700997	2.02792	0.358606	0.622485	Diseases of the digestive system
K08	Other disorders of teeth and supporting structures	Women	1.15	1.85482	0.311666	1.24397	2.46567	0.0474555	0.167413	Diseases of the digestive system
K21	Gastro-esophageal reflux disease	Women	5.48	1.84491	0.153011	1.54502	2.14481	6.26662e-05	0.000720661	Diseases of the digestive system
K29	Gastritis and duodenitis	Women	2.15	1.7807	0.236854	1.31647	2.24492	0.0148458	0.0758786	Diseases of the digestive system
K57	Diverticular disease of intestine	Women	2.67	1.36761	0.23612	0.90482	1.83039	0.184886	0.404989	Diseases of the digestive system
K58	Irritable bowel syndrome	Women	1.97	1.59792	0.250603	1.10675	2.0891	0.0614407	0.194915	Diseases of the digestive system
K76	Other diseases of liver	Women	3.96	1.71506	0.178479	1.36525	2.06487	0.00250717	0.0209691	Diseases of the digestive system
L20	Atopic dermatitis	Women	3.55	1.18474	0.205166	0.782622	1.58686	0.408648	0.637213	Diseases of the skin and subcutaneous tissue
L40	Psoriasis	Women	3.41	1.27228	0.206155	0.868225	1.67634	0.242763	0.472183	Diseases of the skin and subcutaneous tissue
L71	Rosacea	Women	1.54	0.932593	0.329429	0.286924	1.57826	0.832231	0.94525	Diseases of the skin and subcutaneous tissue
M12	Other and unspecified arthropathy	Women	3.59	0.984013	0.216685	0.559318	1.40871	0.940711	0.973387	Diseases of the musculoskeletal system and connective tissue
M13	Other arthritis	Women	2.54	1.04534	0.253065	0.549338	1.54134	0.860916	0.965905	Diseases of the musculoskeletal system and connective tissue
M15	Polyosteoarthritis	Women	1.76	1.01773	0.315861	0.398651	1.6368	0.955635	0.973387	Diseases of the musculoskeletal system and connective tissue
M16	Osteoarthritis of hip	Women	1.64	1.24717	0.308506	0.642507	1.85183	0.474021	0.641323	Diseases of the musculoskeletal system and connective tissue
M17	Osteoarthritis of knee	Women	4.74	1.3596	0.182767	1.00138	1.71782	0.0928076	0.237175	Diseases of the musculoskeletal system and connective tissue
M18	Osteoarthritis of first carpometacarpal joint	Women	2.65	1.21148	0.243963	0.733316	1.68963	0.431667	0.638097	Diseases of the musculoskeletal system and connective tissue
M19	Other and unspecified osteoarthritis	Women	5.62	1.0584	0.178527	0.708491	1.4083	0.75055	0.863132	Diseases of the musculoskeletal system and connective tissue
M20	Acquired deformities of fingers and toes	Women	6.87	1.10923	0.157932	0.799691	1.41877	0.511563	0.682083	Diseases of the musculoskeletal system and connective tissue
M22	Disorder of patella	Women	2.77	1.30949	0.22568	0.867168	1.75182	0.23217	0.46434	Diseases of the musculoskeletal system and connective tissue
M23	Internal derangement of knee	Women	5.87	1.37731	0.157225	1.06915	1.68546	0.0417383	0.159997	Diseases of the musculoskeletal system and connective tissue
M41	Scoliosis	Women	3.49	1.16448	0.208279	0.756265	1.5727	0.464701	0.638097	Diseases of the musculoskeletal system and connective tissue
M47	Spondylosis	Women	3.84	1.2947	0.197277	0.908046	1.68136	0.190457	0.40749	Diseases of the musculoskeletal system and connective tissue
M50	Cervical disc disorders	Women	2.46	1.19791	0.243942	0.719788	1.67602	0.459157	0.638097	Diseases of the musculoskeletal system and connective tissue
M51	Thoracic, thoracolum, and lumbosacral intvrt disc disorders	Women	7.3	1.71716	0.13478	1.453	1.98133	6.03271e-05	0.000720661	Diseases of the musculoskeletal system and connective tissue
M81	Osteoporosis without current pathological fracture	Women	5.64	0.788745	0.204713	0.387516	1.18997	0.246356	0.472183	Diseases of the musculoskeletal system and connective tissue
N39	Other disorders of urinary system	Women	2.81	2.27109	0.195656	1.88761	2.65457	2.76064e-05	0.000423299	Diseases of the genitourinary system
N60	Benign mammary dysplasia	Women	5.7	1.19985	0.162953	0.880472	1.51924	0.263519	0.475367	Diseases of the genitourinary system
N80	Endometriosis	Women	2.2	1.54392	0.23622	1.08094	2.00691	0.0659653	0.199258	Diseases of the genitourinary system
N81	Female genital prolapse	Women	2.67	1.23547	0.238642	0.767741	1.7032	0.375583	0.634337	Diseases of the genitourinary system
N91	Absent, scanty and rare menstruation	Women	4.23	1.5077	0.174786	1.16513	1.85028	0.0188191	0.0911238	Diseases of the genitourinary system
N92	Excessive, frequent and irregular menstruation	Women	15.16	1.26624	0.105814	1.05885	1.47363	0.0256915	0.112553	Diseases of the genitourinary system
N93	Other abnormal uterine and vaginal bleeding	Women	1.74	1.57829	0.263942	1.06097	2.09561	0.0838186	0.233676	Diseases of the genitourinary system
N94	Pain and oth cond assoc w fem gntl org and menstrual cycle	Women	3.41	1.63095	0.189898	1.25876	2.00315	0.0099968	0.0603371	Diseases of the genitourinary system
N95	Menopausal and other perimenopausal disorders	Women	14.73	0.985972	0.118579	0.753561	1.21838	0.905165	0.973387	Diseases of the genitourinary system
N97	Female infertility	Women	2.46	1.54972	0.22266	1.11331	1.98612	0.0491322	0.167413	Diseases of the genitourinary system
O99	Oth maternal diseases classd elsw but compl preg/chldbrth	Women	1.25	0.835405	0.365811	0.118429	1.55238	0.622989	0.764792	Pregnancy, childbirth and the puerperium
Q40	Other congenital malformations of upper alimentary tract	Women	1.56	1.85292	0.273662	1.31655	2.38928	0.0242129	0.111379	Congenital malformations, deformations and chromosomal abnormalities
R32	Unspecified urinary incontinence	Women	4.08	1.33099	0.187171	0.964147	1.69784	0.126605	0.306518	Symptoms, signs and abnormal clinical and laboratory findings, not elsewhere classified
Z96	Presence of other functional implants	Women	1.29	1.32049	0.336184	0.661577	1.9794	0.408278	0.637213	Factors influencing health status and contact with health services
C61	Malignant neoplasm of prostate	Men	1.19	0.931619	0.606067	-0.25625	2.11949	0.906963	0.990423	Neoplasms
D69	Purpura and other hemorrhagic conditions	Men	1.04	1.01219	0.606716	-0.176949	2.20133	0.984063	0.99346	Diseases of the blood and blood-forming organs and certain disorders involving the immune mechanism
D70	Neutropenia	Men	1.25	0.532103	0.726911	-0.892617	1.95682	0.385426	0.708107	Diseases of the blood and blood-forming organs and certain disorders involving the immune mechanism
D72	Other disorders of white blood cells	Men	1.13	2.04785	0.448863	1.16809	2.9276	0.110288	0.414893	Diseases of the blood and blood-forming organs and certain disorders involving the immune mechanism
E02	Subclinical iodine-deficiency hypothyroidism	Men	1.02	1.79793	0.487205	0.843027	2.75284	0.228556	0.603822	Endocrine, nutritional and metabolic diseases
E03	Other hypothyroidism	Men	2.32	1.06076	0.400964	0.274884	1.84663	0.883048	0.990423	Endocrine, nutritional and metabolic diseases
E04	Other nontoxic goiter	Men	1.04	0.995042	0.606396	-0.193472	2.18356	0.99346	0.99346	Endocrine, nutritional and metabolic diseases
E11	Type 2 diabetes mellitus	Men	5.77	1.15786	0.259188	0.649862	1.66586	0.571723	0.853297	Endocrine, nutritional and metabolic diseases
E55	Vitamin D deficiency	Men	1.68	1.08164	0.473714	0.153183	2.01011	0.868412	0.990423	Endocrine, nutritional and metabolic diseases
E66	Overweight and obesity	Men	20.42	1.28188	0.144941	0.997796	1.56596	0.0866619	0.360331	Endocrine, nutritional and metabolic diseases
E78	Disorders of lipoprotein metabolism and other lipidemias	Men	31.99	1.29293	0.132345	1.03353	1.55232	0.0522351	0.284202	Endocrine, nutritional and metabolic diseases
E80	Disorders of porphyrin and bilirubin metabolism	Men	1.07	1.70279	0.4851	0.752008	2.65356	0.272541	0.632321	Endocrine, nutritional and metabolic diseases
F10	Alcohol related disorders	Men	2.99	1.34348	0.325878	0.704776	1.98219	0.364901	0.708107	Mental, Behavioral and Neurodevelopmental disorders
F17	Nicotine dependence	Men	21.66	1.20926	0.142678	0.929612	1.4889	0.182957	0.53532	Mental, Behavioral and Neurodevelopmental disorders
F18	Inhalant related disorders	Men	3.83	0.907207	0.335496	0.249647	1.56477	0.771608	0.983178	Mental, Behavioral and Neurodevelopmental disorders
F32	Major depressive disorder, single episode	Men	6.32	1.39025	0.226032	0.947235	1.83327	0.144927	0.477053	Mental, Behavioral and Neurodevelopmental disorders
F33	Major depressive disorder, recurrent	Men	1.07	1.68849	0.485033	0.737845	2.63914	0.280142	0.632321	Mental, Behavioral and Neurodevelopmental disorders
F34	Persistent mood [affective] disorders	Men	4.03	1.03669	0.3087	0.431653	1.64174	0.907068	0.990423	Mental, Behavioral and Neurodevelopmental disorders
F39	Unspecified mood [affective] disorder	Men	2.96	1.64704	0.304115	1.05099	2.2431	0.100847	0.398346	Mental, Behavioral and Neurodevelopmental disorders
F40	Phobic anxiety disorders	Men	1.36	0.734878	0.599991	-0.441083	1.91084	0.607654	0.860689	Mental, Behavioral and Neurodevelopmental disorders
F41	Other anxiety disorders	Men	19.98	1.4734	0.140248	1.19852	1.74828	0.00571862	0.0832665	Mental, Behavioral and Neurodevelopmental disorders
F43	Reaction to severe stress, and adjustment disorders	Men	4.67	1.28494	0.264173	0.767171	1.80271	0.342597	0.708107	Mental, Behavioral and Neurodevelopmental disorders
F51	Sleep disorders not due to a substance or known physiol cond	Men	5.71	2.10413	0.209353	1.6938	2.51445	0.000380388	0.0104815	Mental, Behavioral and Neurodevelopmental disorders
F52	Sexual dysfnct not due to a substance or known physiol cond	Men	4.9	1.25912	0.264328	0.741048	1.77719	0.383374	0.708107	Mental, Behavioral and Neurodevelopmental disorders
F60	Specific personality disorders	Men	1.28	0.765036	0.601623	-0.414123	1.9442	0.656188	0.906571	Mental, Behavioral and Neurodevelopmental disorders
G43	Migraine	Men	3.39	1.62885	0.283727	1.07275	2.18494	0.0855208	0.360331	Diseases of the nervous system
G44	Other headache syndromes	Men	2.35	2.75549	0.286215	2.19452	3.31646	0.00039803	0.0104815	Diseases of the nervous system
G47	Sleep disorders	Men	6.79	1.64012	0.20976	1.229	2.05124	0.0183366	0.144859	Diseases of the nervous system
G56	Mononeuropathies of upper limb	Men	3.89	1.52638	0.274334	0.988697	2.06407	0.123183	0.442337	Diseases of the nervous system
G57	Mononeuropathies of lower limb	Men	1.39	1.61586	0.441782	0.74998	2.48173	0.277389	0.632321	Diseases of the nervous system
H25	Age-related cataract	Men	1.94	0.5439	0.596979	-0.626158	1.71396	0.307673	0.675171	Diseases of the eye and adnexa
H26	Other cataract	Men	1.36	1.42046	0.481152	0.477415	2.3635	0.465724	0.782813	Diseases of the eye and adnexa
H40	Glaucoma	Men	3.39	0.940615	0.354078	0.246634	1.6346	0.862728	0.990423	Diseases of the eye and adnexa
H43	Disorders of vitreous body	Men	1.48	2.30183	0.39637	1.52496	3.0787	0.0354347	0.233278	Diseases of the eye and adnexa
H54	Blindness and low vision	Men	5.71	1.18442	0.249928	0.694571	1.67427	0.498272	0.819467	Diseases of the eye and adnexa
H60	Otitis externa	Men	8	1.18154	0.212578	0.764892	1.59818	0.432613	0.759476	Diseases of the ear and mastoid process
H65	Nonsuppurative otitis media	Men	1.42	1.22852	0.476178	0.295231	2.16181	0.665584	0.906571	Diseases of the ear and mastoid process
H90	Conductive and sensorineural hearing loss	Men	1.45	0.98231	0.525996	-0.0486247	2.01324	0.97293	0.99346	Diseases of the ear and mastoid process
H91	Other and unspecified hearing loss	Men	8.41	1.42202	0.199268	1.03146	1.81258	0.0772517	0.358993	Diseases of the ear and mastoid process
I10	Essential (primary) hypertension	Men	25.99	1.13821	0.144314	0.855359	1.42106	0.369695	0.708107	Diseases of the circulatory system
I25	Chronic ischemic heart disease	Men	1.22	2.37441	0.421831	1.54764	3.20118	0.0403656	0.245298	Diseases of the circulatory system
I44	Atrioventricular and left bundle-branch block	Men	1.25	1.83989	0.445509	0.966712	2.71308	0.171136	0.519989	Diseases of the circulatory system
I45	Other conduction disorders	Men	2.81	1.43632	0.326948	0.795517	2.07713	0.268089	0.632321	Diseases of the circulatory system
I48	Atrial fibrillation and flutter	Men	1.28	1.12776	0.528988	0.0909661	2.16456	0.820194	0.990423	Diseases of the circulatory system
I49	Other cardiac arrhythmias	Men	2.93	1.23419	0.339817	0.568163	1.90022	0.535781	0.829936	Diseases of the circulatory system
I51	Complications and ill-defined descriptions of heart disease	Men	1.42	0.982039	0.525835	-0.0485774	2.01266	0.972505	0.99346	Diseases of the circulatory system
J30	Vasomotor and allergic rhinitis	Men	13.57	1.02935	0.176436	0.683544	1.37516	0.869759	0.990423	Diseases of the respiratory system
J31	Chronic rhinitis, nasopharyngitis and pharyngitis	Men	1.45	2.42686	0.373576	1.69466	3.15905	0.0176314	0.144859	Diseases of the respiratory system
J44	Other chronic obstructive pulmonary disease	Men	1.62	1.65976	0.411028	0.854159	2.46536	0.217689	0.603822	Diseases of the respiratory system
J45	Asthma	Men	5.68	1.50928	0.227741	1.06291	1.95564	0.0706925	0.349044	Diseases of the respiratory system
K05	Gingivitis and periodontal diseases	Men	1.42	1.52711	0.440403	0.663937	2.39029	0.33638	0.708107	Diseases of the digestive system
K08	Other disorders of teeth and supporting structures	Men	1.25	1.42282	0.479901	0.482233	2.36341	0.462448	0.782813	Diseases of the digestive system
K21	Gastro-esophageal reflux disease	Men	6.41	1.52588	0.219273	1.09611	1.95564	0.0539624	0.284202	Diseases of the digestive system
K26	Duodenal ulcer	Men	1.25	2.61929	0.398026	1.83918	3.39941	0.0155546	0.144859	Diseases of the digestive system
K29	Gastritis and duodenitis	Men	1.6	2.20445	0.370412	1.47845	2.93044	0.0328388	0.233278	Diseases of the digestive system
K57	Diverticular disease of intestine	Men	3.48	1.43287	0.304126	0.836792	2.02895	0.236943	0.603822	Diseases of the digestive system
K58	Irritable bowel syndrome	Men	1.48	1.18053	0.47512	0.249311	2.11175	0.726857	0.957029	Diseases of the digestive system
K76	Other diseases of liver	Men	5.8	1.10608	0.255998	0.604337	1.60783	0.693689	0.928838	Diseases of the digestive system
L20	Atopic dermatitis	Men	2.47	0.80385	0.428191	-0.0353888	1.64309	0.610109	0.860689	Diseases of the skin and subcutaneous tissue
L40	Psoriasis	Men	3.48	1.21809	0.310812	0.608908	1.82727	0.525602	0.829936	Diseases of the skin and subcutaneous tissue
M10	Gout	Men	3.48	0.899136	0.352888	0.207488	1.59078	0.763194	0.983178	Diseases of the musculoskeletal system and connective tissue
M12	Other and unspecified arthropathy	Men	2.81	0.967161	0.374386	0.233378	1.70094	0.928934	0.990423	Diseases of the musculoskeletal system and connective tissue
M13	Other arthritis	Men	1.8	0.965338	0.470831	0.0425266	1.88815	0.940275	0.990423	Diseases of the musculoskeletal system and connective tissue
M16	Osteoarthritis of hip	Men	2.76	1.03998	0.37606	0.302911	1.77704	0.916986	0.990423	Diseases of the musculoskeletal system and connective tissue
M17	Osteoarthritis of knee	Men	3.89	0.819145	0.353446	0.126404	1.51189	0.572465	0.853297	Diseases of the musculoskeletal system and connective tissue
M18	Osteoarthritis of first carpometacarpal joint	Men	1.13	3.00777	0.403298	2.21732	3.79822	0.00632404	0.0832665	Diseases of the musculoskeletal system and connective tissue
M19	Other and unspecified osteoarthritis	Men	2.87	1.32973	0.343602	0.656286	2.00318	0.406886	0.730545	Diseases of the musculoskeletal system and connective tissue
M20	Acquired deformities of fingers and toes	Men	2.29	1.6377	0.344913	0.961681	2.31371	0.152662	0.482412	Diseases of the musculoskeletal system and connective tissue
M22	Disorder of patella	Men	2.84	0.575772	0.463304	-0.332288	1.48383	0.233443	0.603822	Diseases of the musculoskeletal system and connective tissue
M23	Internal derangement of knee	Men	9.37	1.33166	0.193161	0.953073	1.71025	0.138117	0.4744	Diseases of the musculoskeletal system and connective tissue
M41	Scoliosis	Men	1.91	1.0692	0.432772	0.220985	1.91742	0.877125	0.990423	Diseases of the musculoskeletal system and connective tissue
M47	Spondylosis	Men	2.81	2.88923	0.265449	2.36896	3.4095	6.4159e-05	0.00506856	Diseases of the musculoskeletal system and connective tissue
M50	Cervical disc disorders	Men	1.39	2.91556	0.361114	2.20779	3.62333	0.00304432	0.0601253	Diseases of the musculoskeletal system and connective tissue
M51	Thoracic, thoracolum, and lumbosacral intvrt disc disorders	Men	7.69	1.61909	0.197242	1.2325	2.00567	0.0145656	0.144859	Diseases of the musculoskeletal system and connective tissue
N18	Chronic kidney disease (CKD)	Men	1.33	0.510403	0.726334	-0.913185	1.93399	0.354468	0.708107	Diseases of the genitourinary system
N40	Enlarged prostate	Men	13.54	0.974428	0.197506	0.587323	1.36153	0.895649	0.990423	Diseases of the genitourinary system
N48	Other disorders of penis	Men	2.47	0.959602	0.399602	0.176396	1.74281	0.917808	0.990423	Diseases of the genitourinary system
Q40	Other congenital malformations of upper alimentary tract	Men	2.03	1.24082	0.403861	0.449264	2.03237	0.593156	0.860689	Congenital malformations, deformations and chromosomal abnormalities
Z96	Presence of other functional implants	Men	1.36	1.37282	0.478997	0.434004	2.31164	0.508277	0.819467	Factors influencing health status and contact with health services

## Sheet: Sup Table S3
Table S3. Enrichment of ICD-10 Chapter in long COVID associated diseases. N background refers to the number of diseases included in the analysis and N significant the ones that were associated with long COVID.
Chapter	N background	N significant	OR	CI 95% lower	CI 95% upper	p-value	Analysis
Diseases of the blood and blood-forming organs and certain disorders involving the immune mechanism	3	0	0	0	6.33254	0.555988	Both
Endocrine, nutritional and metabolic diseases	9	3	1.33689	0.196744	7.04978	0.703257	Both
Mental, Behavioral and Neurodevelopmental disorders	14	4	1.04387	0.211639	4.23595	1	Both
Diseases of the nervous system	5	3	4.24587	0.450919	54.4264	0.128724	Both
Diseases of the eye and adnexa	5	0	0	0	2.81244	0.314508	Both
Diseases of the ear and mastoid process	4	2	2.70934	0.184994	39.7424	0.308666	Both
Diseases of the circulatory system	4	1	0.858769	0.0155994	11.402	1	Both
Diseases of the respiratory system	5	2	1.78519	0.139532	16.8095	0.614411	Both
Diseases of the digestive system	7	3	2.0703	0.277747	13.5033	0.390923	Both
Diseases of the skin and subcutaneous tissue	3	0	0	0	6.33254	0.555988	Both
Diseases of the musculoskeletal system and connective tissue	16	3	0.538304	0.0883042	2.29054	0.534805	Both
Diseases of the genitourinary system	1	1	Inf	0.0664334	Inf	0.278481	Both
Congenital malformations, deformations and chromosomal abnormalities	1	0	0	0	100.888	1	Both
Symptoms, signs and abnormal clinical and laboratory findings, not elsewhere classified	1	0	0	0	100.888	1	Both
Factors influencing health status and contact with health services	1	0	0	0	100.888	1	Both
Neoplasms	1	0	0	0	236.129	1	Women
Diseases of the blood and blood-forming organs and certain disorders involving the immune mechanism	3	0	0	0	15.3106	1	Women
Endocrine, nutritional and metabolic diseases	11	1	0.577974	0.0122469	4.79825	1	Women
Mental, Behavioral and Neurodevelopmental disorders	13	4	3.39497	0.63391	15.7542	0.0833994	Women
Diseases of the nervous system	6	1	1.23034	0.0240928	12.4986	1	Women
Diseases of the eye and adnexa	6	0	0	0	5.38092	0.589117	Women
Diseases of the ear and mastoid process	4	0	0	0	9.63671	1	Women
Diseases of the circulatory system	4	1	2.0896	0.0371515	28.6187	0.46227	Women
Diseases of the respiratory system	5	2	4.49084	0.339933	44.0369	0.14452	Women
Diseases of the digestive system	7	2	2.65289	0.226476	18.8831	0.256637	Women
Diseases of the skin and subcutaneous tissue	3	0	0	0	15.3106	1	Women
Diseases of the musculoskeletal system and connective tissue	15	1	0.390054	0.00845944	3.07148	0.685784	Women
Diseases of the genitourinary system	10	1	0.650854	0.0136678	5.52005	1	Women
Pregnancy, childbirth and the puerperium	1	0	0	0	236.129	1	Women
Congenital malformations, deformations and chromosomal abnormalities	1	0	0	0	236.129	1	Women
Symptoms, signs and abnormal clinical and laboratory findings, not elsewhere classified	1	0	0	0	236.129	1	Women
Factors influencing health status and contact with health services	1	0	0	0	236.129	1	Women
Neoplasms	1	0	0	0	972.995	1	Men
Diseases of the blood and blood-forming organs and certain disorders involving the immune mechanism	3	0	0	0	81.3938	1	Men
Endocrine, nutritional and metabolic diseases	8	0	0	0	23.1859	1	Men
Mental, Behavioral and Neurodevelopmental disorders	13	1	2.62345	0.0417549	54.1951	0.421338	Men
Diseases of the nervous system	5	1	8.44594	0.122257	198.403	0.180263	Men
Diseases of the eye and adnexa	5	0	0	0	41.3147	1	Men
Diseases of the ear and mastoid process	4	0	0	0	55.0057	1	Men
Diseases of the circulatory system	7	0	0	0	27.2911	1	Men
Diseases of the respiratory system	4	0	0	0	55.0057	1	Men
Diseases of the digestive system	8	0	0	0	23.1859	1	Men
Diseases of the skin and subcutaneous tissue	2	0	0	0	158.479	1	Men
Diseases of the musculoskeletal system and connective tissue	14	1	2.38888	0.0381649	49.1436	0.447641	Men
Diseases of the genitourinary system	3	0	0	0	81.3938	1	Men
Congenital malformations, deformations and chromosomal abnormalities	1	0	0	0	972.995	1	Men
Factors influencing health status and contact with health services	1	0	0	0	972.995	1	Men

## Sheet: Sup Table S4
Table S4. Enrichment of long COVID symptoms in long COVID associated diseases.
ICD	Description	Symptom	OR	CI 95% lower	CI 95% upper	P-value	Adjusted p-value	Analysis
E03	Other hypothyroidism	dry_eyes_mouth	1.21572	0.686232	2.06812	0.488073	0.897561	Both
E03	Other hypothyroidism	tingling_sensation	0.280273	0.0326789	1.08707	0.0787742	0.43416	Both
E03	Other hypothyroidism	dermatological	1.42419	0.80088	2.43357	0.190417	0.645451	Both
E03	Other hypothyroidism	fever	5.1111	0.78287	26.6922	0.0446114	0.342654	Both
E03	Other hypothyroidism	psychological	1.19205	0.721095	1.92052	0.463886	0.889244	Both
E03	Other hypothyroidism	abdominal_pain	0.459483	0.0109262	2.96755	0.71144	1	Both
E03	Other hypothyroidism	tiredness	1.09284	0.709969	1.66807	0.677279	1	Both
E03	Other hypothyroidism	digestive	0.509025	0.0997076	1.62331	0.35271	0.795803	Both
E03	Other hypothyroidism	menstrual_disturbances	0.593048	0.153013	1.65537	0.39112	0.837948	Both
E03	Other hypothyroidism	chills	1.01314	0.255751	2.93045	1	1	Both
E03	Other hypothyroidism	endocrin	2.64401	0.934748	6.56582	0.0333797	0.315871	Both
E03	Other hypothyroidism	cardiovascular	1.26845	0.586819	2.50875	0.464428	0.889244	Both
E03	Other hypothyroidism	hematological	0.757489	0.017436	5.30339	1	1	Both
E03	Other hypothyroidism	respiratory_problems	1.34116	0.854346	2.07752	0.178627	0.621213	Both
E03	Other hypothyroidism	muscular	1.16957	0.766693	1.77584	0.4719	0.889244	Both
E03	Other hypothyroidism	headache	1.85316	1.01958	3.23245	0.0335623	0.315871	Both
E03	Other hypothyroidism	cognitive	0.957807	0.581167	1.5378	0.907981	1	Both
E03	Other hypothyroidism	renal	0.757489	0.017436	5.30339	1	1	Both
E03	Other hypothyroidism	loss_taste_smell	0.730411	0.398034	1.27108	0.308465	0.768088	Both
E66	Overweight and obesity	dry_eyes_mouth	1.41247	0.945268	2.08653	0.0831527	0.4514	Both
E66	Overweight and obesity	tingling_sensation	1.93928	1.05734	3.47224	0.0244791	0.279286	Both
E66	Overweight and obesity	dermatological	0.95383	0.603865	1.47399	0.914948	1	Both
E66	Overweight and obesity	fever	0.478109	0.0105611	3.7517	0.690211	1	Both
E66	Overweight and obesity	psychological	1.34684	0.942483	1.91011	0.0881813	0.471186	Both
E66	Overweight and obesity	abdominal_pain	1.20419	0.335833	3.5852	0.782784	1	Both
E66	Overweight and obesity	tiredness	1.10203	0.80692	1.50064	0.539908	0.936029	Both
E66	Overweight and obesity	digestive	1.42669	0.71193	2.73041	0.304083	0.76232	Both
E66	Overweight and obesity	menstrual_disturbances	0.364477	0.12639	0.862467	0.015908	0.212695	Both
E66	Overweight and obesity	chills	1.25503	0.533662	2.72463	0.551562	0.945909	Both
E66	Overweight and obesity	endocrin	1.02333	0.366021	2.50337	1	1	Both
E66	Overweight and obesity	cardiovascular	1.037	0.581248	1.78096	0.893113	1	Both
E66	Overweight and obesity	hematological	1.12149	0.193723	4.54176	0.742672	1	Both
E66	Overweight and obesity	respiratory_problems	1.22774	0.880982	1.70195	0.216089	0.674875	Both
E66	Overweight and obesity	muscular	1.501	1.10758	2.03376	0.0080489	0.170921	Both
E66	Overweight and obesity	headache	0.961551	0.574764	1.56132	1	1	Both
E66	Overweight and obesity	cognitive	0.925563	0.647326	1.31081	0.670803	1	Both
E66	Overweight and obesity	renal	0.669476	0.0708414	3.17337	1	1	Both
E66	Overweight and obesity	loss_taste_smell	0.863362	0.577435	1.27099	0.512687	0.908225	Both
E78	Disorders of lipoprotein metabolism and other lipidemias	dry_eyes_mouth	1.44807	0.996923	2.08953	0.0474419	0.357655	Both
E78	Disorders of lipoprotein metabolism and other lipidemias	tingling_sensation	1.26984	0.688757	2.27658	0.460112	0.889244	Both
E78	Disorders of lipoprotein metabolism and other lipidemias	dermatological	0.692065	0.442416	1.05965	0.0922547	0.471186	Both
E78	Disorders of lipoprotein metabolism and other lipidemias	fever	1.469	0.226688	7.60552	0.697615	1	Both
E78	Disorders of lipoprotein metabolism and other lipidemias	psychological	1.23826	0.886174	1.72111	0.211939	0.674875	Both
E78	Disorders of lipoprotein metabolism and other lipidemias	abdominal_pain	0.869895	0.242967	2.58507	1	1	Both
E78	Disorders of lipoprotein metabolism and other lipidemias	tiredness	1.01442	0.75966	1.35148	0.943422	1	Both
E78	Disorders of lipoprotein metabolism and other lipidemias	digestive	1.47953	0.778433	2.74272	0.205818	0.670717	Both
E78	Disorders of lipoprotein metabolism and other lipidemias	menstrual_disturbances	0.676127	0.329875	1.29666	0.24094	0.682793	Both
E78	Disorders of lipoprotein metabolism and other lipidemias	chills	1.03416	0.454883	2.20053	1	1	Both
E78	Disorders of lipoprotein metabolism and other lipidemias	endocrin	0.88483	0.336619	2.09299	0.841374	1	Both
E78	Disorders of lipoprotein metabolism and other lipidemias	cardiovascular	1.14993	0.684725	1.8906	0.61792	0.988032	Both
E78	Disorders of lipoprotein metabolism and other lipidemias	hematological	2.46853	0.654167	9.31798	0.118014	0.516401	Both
E78	Disorders of lipoprotein metabolism and other lipidemias	respiratory_problems	1.07259	0.785849	1.45773	0.647333	0.998871	Both
E78	Disorders of lipoprotein metabolism and other lipidemias	muscular	1.25541	0.946532	1.6638	0.107546	0.501312	Both
E78	Disorders of lipoprotein metabolism and other lipidemias	headache	1.12417	0.71272	1.74536	0.582969	0.974314	Both
E78	Disorders of lipoprotein metabolism and other lipidemias	cognitive	0.986378	0.712426	1.35774	1	1	Both
E78	Disorders of lipoprotein metabolism and other lipidemias	renal	4.9807	1.32216	22.7787	0.00736381	0.166146	Both
E78	Disorders of lipoprotein metabolism and other lipidemias	loss_taste_smell	0.929814	0.647055	1.32363	0.729284	1	Both
F32	Major depressive disorder, single episode	dry_eyes_mouth	1.13465	0.686417	1.82169	0.628344	0.991674	Both
F32	Major depressive disorder, single episode	tingling_sensation	1.35819	0.620601	2.73341	0.347482	0.788938	Both
F32	Major depressive disorder, single episode	dermatological	1.19349	0.707565	1.94906	0.448256	0.884408	Both
F32	Major depressive disorder, single episode	fever	0.829665	0.0182852	6.53276	1	1	Both
F32	Major depressive disorder, single episode	psychological	1.72178	1.14517	2.56175	0.00735948	0.166146	Both
F32	Major depressive disorder, single episode	abdominal_pain	1.09199	0.201442	3.8826	0.750833	1	Both
F32	Major depressive disorder, single episode	tiredness	1.71378	1.19128	2.4643	0.002606	0.0855242	Both
F32	Major depressive disorder, single episode	digestive	2.08055	0.990707	4.117	0.039314	0.325312	Both
F32	Major depressive disorder, single episode	menstrual_disturbances	0.644355	0.222221	1.53614	0.446853	0.884408	Both
F32	Major depressive disorder, single episode	chills	1.3736	0.499659	3.27045	0.475647	0.889244	Both
F32	Major depressive disorder, single episode	endocrin	0.891794	0.222938	2.62425	1	1	Both
F32	Major depressive disorder, single episode	cardiovascular	1.51051	0.806349	2.69717	0.150705	0.576867	Both
F32	Major depressive disorder, single episode	hematological	1.95571	0.336692	7.95467	0.399661	0.845877	Both
F32	Major depressive disorder, single episode	respiratory_problems	1.18747	0.797205	1.74995	0.378382	0.822867	Both
F32	Major depressive disorder, single episode	muscular	1.77751	1.23763	2.55622	0.00120489	0.0512036	Both
F32	Major depressive disorder, single episode	headache	1.49255	0.8592	2.50461	0.120355	0.523473	Both
F32	Major depressive disorder, single episode	cognitive	1.16637	0.771198	1.74027	0.477876	0.889244	Both
F32	Major depressive disorder, single episode	renal	1.16489	0.122904	5.54497	0.692207	1	Both
F32	Major depressive disorder, single episode	loss_taste_smell	0.377895	0.196614	0.675523	0.000339566	0.0244855	Both
F39	Unspecified mood [affective] disorder	dry_eyes_mouth	1.22794	0.618169	2.29013	0.512707	0.908225	Both
F39	Unspecified mood [affective] disorder	tingling_sensation	1.75661	0.648457	4.08344	0.1937	0.650471	Both
F39	Unspecified mood [affective] disorder	dermatological	0.706964	0.286934	1.51782	0.490997	0.897561	Both
F39	Unspecified mood [affective] disorder	fever	0	0	7.42885	1	1	Both
F39	Unspecified mood [affective] disorder	psychological	1.03837	0.554958	1.8529	0.885548	1	Both
F39	Unspecified mood [affective] disorder	abdominal_pain	2.40375	0.438883	8.67812	0.159954	0.592239	Both
F39	Unspecified mood [affective] disorder	tiredness	2.21522	1.34748	3.66449	0.00120562	0.0512036	Both
F39	Unspecified mood [affective] disorder	digestive	2.09386	0.766816	4.92342	0.0927727	0.471186	Both
F39	Unspecified mood [affective] disorder	menstrual_disturbances	1.17221	0.354643	3.04277	0.795652	1	Both
F39	Unspecified mood [affective] disorder	chills	1.11066	0.213185	3.66586	0.749837	1	Both
F39	Unspecified mood [affective] disorder	endocrin	1.40889	0.267257	4.74732	0.480909	0.891469	Both
F39	Unspecified mood [affective] disorder	cardiovascular	1.13788	0.426393	2.59007	0.668559	1	Both
F39	Unspecified mood [affective] disorder	hematological	1.14166	0.0261825	8.05095	0.603821	0.988032	Both
F39	Unspecified mood [affective] disorder	respiratory_problems	1.36383	0.797227	2.2868	0.232998	0.677122	Both
F39	Unspecified mood [affective] disorder	muscular	1.82036	1.10859	3.00311	0.0146394	0.207248	Both
F39	Unspecified mood [affective] disorder	headache	1.59852	0.758599	3.11972	0.177314	0.621213	Both
F39	Unspecified mood [affective] disorder	cognitive	1.59698	0.931942	2.68262	0.0739349	0.426401	Both
F39	Unspecified mood [affective] disorder	renal	2.54524	0.266427	12.2642	0.220259	0.674875	Both
F39	Unspecified mood [affective] disorder	loss_taste_smell	0.604753	0.272001	1.21221	0.175832	0.619273	Both
F41	Other anxiety disorders	dry_eyes_mouth	1.24243	0.868595	1.7709	0.217055	0.674875	Both
F41	Other anxiety disorders	tingling_sensation	1.77518	1.01125	3.12107	0.0373794	0.324704	Both
F41	Other anxiety disorders	dermatological	0.928021	0.629902	1.3564	0.711585	1	Both
F41	Other anxiety disorders	fever	0.55094	0.0540978	3.10061	0.717275	1	Both
F41	Other anxiety disorders	psychological	1.97154	1.4446	2.69206	1.14953e-05	0.00285379	Both
F41	Other anxiety disorders	abdominal_pain	2.31652	0.840123	6.6966	0.0919028	0.471186	Both
F41	Other anxiety disorders	tiredness	1.72148	1.31682	2.25135	4.75642e-05	0.00490591	Both
F41	Other anxiety disorders	digestive	2.28098	1.2446	4.23482	0.00462101	0.119156	Both
F41	Other anxiety disorders	menstrual_disturbances	0.912059	0.500215	1.6227	0.78352	1	Both
F41	Other anxiety disorders	chills	2.24305	1.09944	4.66074	0.0232484	0.279286	Both
F41	Other anxiety disorders	endocrin	3.43983	1.51725	8.32376	0.00167257	0.0670888	Both
F41	Other anxiety disorders	cardiovascular	1.52858	0.952174	2.44713	0.0624956	0.413961	Both
F41	Other anxiety disorders	hematological	0.328602	0.0348217	1.55374	0.228708	0.677122	Both
F41	Other anxiety disorders	respiratory_problems	1.39007	1.04282	1.8513	0.0219212	0.268256	Both
F41	Other anxiety disorders	muscular	1.39142	1.06798	1.81288	0.0126338	0.207248	Both
F41	Other anxiety disorders	headache	1.69922	1.12267	2.57096	0.00961029	0.182596	Both
F41	Other anxiety disorders	cognitive	1.4181	1.05374	1.90651	0.0178362	0.234141	Both
F41	Other anxiety disorders	renal	3.36264	0.89366	15.3598	0.066768	0.417707	Both
F41	Other anxiety disorders	loss_taste_smell	0.671201	0.473108	0.944357	0.0185985	0.236086	Both
F43	Reaction to severe stress, and adjustment disorders	dry_eyes_mouth	0.930754	0.505438	1.62648	0.891854	1	Both
F43	Reaction to severe stress, and adjustment disorders	tingling_sensation	1.69832	0.744088	3.52569	0.137181	0.553736	Both
F43	Reaction to severe stress, and adjustment disorders	dermatological	0.698088	0.339556	1.31925	0.316232	0.769116	Both
F43	Reaction to severe stress, and adjustment disorders	fever	1.14774	0.0252494	9.06612	1	1	Both
F43	Reaction to severe stress, and adjustment disorders	psychological	2.56382	1.65741	3.93647	1.81419e-05	0.00285379	Both
F43	Reaction to severe stress, and adjustment disorders	abdominal_pain	0.44126	0.0104962	2.84813	0.712319	1	Both
F43	Reaction to severe stress, and adjustment disorders	tiredness	2.03502	1.34959	3.07483	0.000440874	0.0244855	Both
F43	Reaction to severe stress, and adjustment disorders	digestive	1.52976	0.604716	3.4078	0.257264	0.711665	Both
F43	Reaction to severe stress, and adjustment disorders	menstrual_disturbances	0.903624	0.310042	2.16991	1	1	Both
F43	Reaction to severe stress, and adjustment disorders	chills	2.30338	0.88643	5.33462	0.0553753	0.38919	Both
F43	Reaction to severe stress, and adjustment disorders	endocrin	0.888965	0.169849	2.9612	1	1	Both
F43	Reaction to severe stress, and adjustment disorders	cardiovascular	1.50633	0.738503	2.86485	0.205651	0.670717	Both
F43	Reaction to severe stress, and adjustment disorders	hematological	1.61516	0.169975	7.72004	0.63315	0.993771	Both
F43	Reaction to severe stress, and adjustment disorders	respiratory_problems	2.03243	1.33121	3.08667	0.000830208	0.042815	Both
F43	Reaction to severe stress, and adjustment disorders	muscular	1.56228	1.03675	2.35477	0.0260375	0.280991	Both
F43	Reaction to severe stress, and adjustment disorders	headache	1.2774	0.662021	2.32194	0.424512	0.862803	Both
F43	Reaction to severe stress, and adjustment disorders	cognitive	1.0636	0.658566	1.68056	0.81927	1	Both
F43	Reaction to severe stress, and adjustment disorders	renal	0.727472	0.01675	5.09069	1	1	Both
F43	Reaction to severe stress, and adjustment disorders	loss_taste_smell	0.805662	0.452467	1.3707	0.454453	0.884408	Both
G43	Migraine	dry_eyes_mouth	1.37205	0.825166	2.21839	0.199975	0.663055	Both
G43	Migraine	tingling_sensation	1.41799	0.623661	2.92929	0.317447	0.769116	Both
G43	Migraine	dermatological	1.71324	1.0326	2.77105	0.0306123	0.311297	Both
G43	Migraine	fever	0.970582	0.0213737	7.65343	1	1	Both
G43	Migraine	psychological	1.68382	1.09235	2.56208	0.0130089	0.207248	Both
G43	Migraine	abdominal_pain	1.83613	0.436761	5.88423	0.290706	0.748058	Both
G43	Migraine	tiredness	1.53347	1.04149	2.2533	0.0263414	0.280991	Both
G43	Migraine	digestive	4.12557	2.11379	7.83291	1.97631e-05	0.00285379	Both
G43	Migraine	menstrual_disturbances	1.60709	0.732028	3.24716	0.163458	0.596049	Both
G43	Migraine	chills	1.92958	0.745032	4.45049	0.127333	0.534503	Both
G43	Migraine	endocrin	2.126	0.754437	5.2532	0.0933235	0.471186	Both
G43	Migraine	cardiovascular	1.51396	0.778449	2.78022	0.174955	0.619204	Both
G43	Migraine	hematological	2.2922	0.394073	9.34003	0.191349	0.645578	Both
G43	Migraine	respiratory_problems	0.99687	0.644364	1.5174	1	1	Both
G43	Migraine	muscular	1.10926	0.750965	1.63116	0.634713	0.994062	Both
G43	Migraine	headache	1.79206	1.02644	3.0255	0.0346554	0.315871	Both
G43	Migraine	cognitive	1.33755	0.871224	2.02598	0.163459	0.596049	Both
G43	Migraine	renal	3.46618	0.752955	13.1629	0.0561932	0.38919	Both
G43	Migraine	loss_taste_smell	0.753814	0.436319	1.25034	0.291142	0.748058	Both
G44	Other headache syndromes	dry_eyes_mouth	1.68731	0.834753	3.22045	0.101221	0.490482	Both
G44	Other headache syndromes	tingling_sensation	1.91879	0.645265	4.7419	0.148223	0.576867	Both
G44	Other headache syndromes	dermatological	1.09012	0.460926	2.30333	0.84751	1	Both
G44	Other headache syndromes	fever	0	0	9.61325	1	1	Both
G44	Other headache syndromes	psychological	1.72603	0.925146	3.11899	0.0744135	0.426401	Both
G44	Other headache syndromes	abdominal_pain	0.895569	0.0211389	5.87036	1	1	Both
G44	Other headache syndromes	tiredness	1.4083	0.800201	2.45992	0.216387	0.674875	Both
G44	Other headache syndromes	digestive	4.51501	1.90444	9.85349	0.000415159	0.0244855	Both
G44	Other headache syndromes	menstrual_disturbances	1.1868	0.301565	3.39226	0.771701	1	Both
G44	Other headache syndromes	chills	2.02412	0.503401	5.9876	0.26798	0.724271	Both
G44	Other headache syndromes	endocrin	0.549664	0.0132329	3.4391	1	1	Both
G44	Other headache syndromes	cardiovascular	0.78324	0.201147	2.20209	0.811172	1	Both
G44	Other headache syndromes	hematological	0	0	5.89786	1	1	Both
G44	Other headache syndromes	respiratory_problems	1.76992	0.989962	3.11593	0.0386583	0.324704	Both
G44	Other headache syndromes	muscular	2.17774	1.24436	3.86119	0.00414424	0.11082	Both
G44	Other headache syndromes	headache	1.69895	0.744799	3.52394	0.137018	0.553736	Both
G44	Other headache syndromes	cognitive	1.18093	0.619383	2.1606	0.544161	0.937848	Both
G44	Other headache syndromes	renal	3.30045	0.343956	16.0246	0.151623	0.576867	Both
G44	Other headache syndromes	loss_taste_smell	0.527915	0.19931	1.18988	0.131505	0.545019	Both
G56	Mononeuropathies of upper limb	dry_eyes_mouth	2.17334	1.29376	3.56872	0.00219975	0.0793629	Both
G56	Mononeuropathies of upper limb	tingling_sensation	3.5426	1.75567	6.8199	0.000249269	0.0224966	Both
G56	Mononeuropathies of upper limb	dermatological	1.09431	0.568779	1.98199	0.7617	1	Both
G56	Mononeuropathies of upper limb	fever	0	0	5.4798	1	1	Both
G56	Mononeuropathies of upper limb	psychological	2.00215	1.24398	3.17731	0.00311119	0.093595	Both
G56	Mononeuropathies of upper limb	abdominal_pain	2.53563	0.600539	8.17442	0.104281	0.498614	Both
G56	Mononeuropathies of upper limb	tiredness	1.19252	0.762662	1.8505	0.446304	0.884408	Both
G56	Mononeuropathies of upper limb	digestive	3.10706	1.42696	6.3327	0.00230834	0.0793629	Both
G56	Mononeuropathies of upper limb	menstrual_disturbances	0.662351	0.170618	1.85388	0.648772	0.998871	Both
G56	Mononeuropathies of upper limb	chills	1.47468	0.438157	3.93927	0.39564	0.845124	Both
G56	Mononeuropathies of upper limb	endocrin	1.90173	0.555562	5.21825	0.20288	0.668854	Both
G56	Mononeuropathies of upper limb	cardiovascular	1.10995	0.47283	2.31933	0.704914	1	Both
G56	Mononeuropathies of upper limb	hematological	0.843086	0.019391	5.91277	1	1	Both
G56	Mononeuropathies of upper limb	respiratory_problems	1.05092	0.642018	1.68392	0.815712	1	Both
G56	Mononeuropathies of upper limb	muscular	1.69586	1.09741	2.62538	0.0134444	0.207248	Both
G56	Mononeuropathies of upper limb	headache	0.900975	0.404719	1.8081	0.866882	1	Both
G56	Mononeuropathies of upper limb	cognitive	1.16813	0.708315	1.88312	0.544828	0.937848	Both
G56	Mononeuropathies of upper limb	renal	0.843086	0.019391	5.91277	1	1	Both
G56	Mononeuropathies of upper limb	loss_taste_smell	0.962774	0.537182	1.65177	1	1	Both
H65	Nonsuppurative otitis media	dry_eyes_mouth	0.545485	0.105067	1.79259	0.459083	0.889244	Both
H65	Nonsuppurative otitis media	tingling_sensation	1.09929	0.124236	4.5214	0.705061	1	Both
H65	Nonsuppurative otitis media	dermatological	0.87461	0.219572	2.55508	1	1	Both
H65	Nonsuppurative otitis media	fever	0	0	18.9115	1	1	Both
H65	Nonsuppurative otitis media	psychological	1.00645	0.362554	2.43484	1	1	Both
H65	Nonsuppurative otitis media	abdominal_pain	0	0	6.90648	1	1	Both
H65	Nonsuppurative otitis media	tiredness	1.50747	0.692045	3.25146	0.26817	0.724271	Both
H65	Nonsuppurative otitis media	digestive	2.04333	0.384881	6.96013	0.208264	0.671905	Both
H65	Nonsuppurative otitis media	menstrual_disturbances	1.09929	0.124236	4.5214	0.705061	1	Both
H65	Nonsuppurative otitis media	chills	1.83106	0.204059	7.72575	0.321092	0.770043	Both
H65	Nonsuppurative otitis media	endocrin	1.07664	0.0255496	6.95298	0.617718	0.988032	Both
H65	Nonsuppurative otitis media	cardiovascular	0.734348	0.0835854	2.98249	1	1	Both
H65	Nonsuppurative otitis media	hematological	0	0	11.6292	1	1	Both
H65	Nonsuppurative otitis media	respiratory_problems	1.35432	0.581683	2.9837	0.427276	0.863851	Both
H65	Nonsuppurative otitis media	muscular	1.16066	0.527725	2.50183	0.716161	1	Both
H65	Nonsuppurative otitis media	headache	1.17572	0.294075	3.45333	0.770894	1	Both
H65	Nonsuppurative otitis media	cognitive	0.413808	0.104447	1.19912	0.100913	0.490482	Both
H65	Nonsuppurative otitis media	renal	0	0	11.6292	1	1	Both
H65	Nonsuppurative otitis media	loss_taste_smell	0.949137	0.315069	2.40084	1	1	Both
H91	Other and unspecified hearing loss	dry_eyes_mouth	1.01781	0.529119	1.84336	1	1	Both
H91	Other and unspecified hearing loss	tingling_sensation	0.916625	0.278908	2.35956	1	1	Both
H91	Other and unspecified hearing loss	dermatological	0.985028	0.48863	1.84548	1	1	Both
H91	Other and unspecified hearing loss	fever	0	0	5.87243	1	1	Both
H91	Other and unspecified hearing loss	psychological	1.89051	1.15373	3.04677	0.00837364	0.17109	Both
H91	Other and unspecified hearing loss	abdominal_pain	0.548043	0.0130126	3.55022	1	1	Both
H91	Other and unspecified hearing loss	tiredness	1.16028	0.731254	1.82487	0.503678	0.908225	Both
H91	Other and unspecified hearing loss	digestive	2.24889	0.930168	4.89489	0.0425603	0.334096	Both
H91	Other and unspecified hearing loss	menstrual_disturbances	0.71132	0.182985	1.99474	0.646302	0.998871	Both
H91	Other and unspecified hearing loss	chills	2.42431	0.872801	5.85058	0.0715413	0.423247	Both
H91	Other and unspecified hearing loss	endocrin	2.04309	0.596064	5.61751	0.184785	0.632297	Both
H91	Other and unspecified hearing loss	cardiovascular	1.72693	0.818898	3.37327	0.113045	0.508951	Both
H91	Other and unspecified hearing loss	hematological	2.00909	0.210959	9.63528	0.301064	0.76232	Both
H91	Other and unspecified hearing loss	respiratory_problems	1.7582	1.1011	2.78075	0.0155231	0.212695	Both
H91	Other and unspecified hearing loss	muscular	1.11099	0.703657	1.7423	0.65961	1	Both
H91	Other and unspecified hearing loss	headache	1.2217	0.585711	2.35258	0.491048	0.897561	Both
H91	Other and unspecified hearing loss	cognitive	1.28521	0.775272	2.08503	0.318974	0.770043	Both
H91	Other and unspecified hearing loss	renal	0.903304	0.0207637	6.34227	1	1	Both
H91	Other and unspecified hearing loss	loss_taste_smell	0.577859	0.280954	1.09309	0.100559	0.490482	Both
I49	Other cardiac arrhythmias	dry_eyes_mouth	1.21762	0.444481	2.88457	0.649315	0.998871	Both
I49	Other cardiac arrhythmias	tingling_sensation	1.43053	0.273166	4.76106	0.475212	0.889244	Both
I49	Other cardiac arrhythmias	dermatological	0.516985	0.100388	1.67462	0.345963	0.787966	Both
I49	Other cardiac arrhythmias	fever	0	0	15.73	1	1	Both
I49	Other cardiac arrhythmias	psychological	0.956808	0.373444	2.17585	1	1	Both
I49	Other cardiac arrhythmias	abdominal_pain	0	0	5.73338	1	1	Both
I49	Other cardiac arrhythmias	tiredness	1.10398	0.528491	2.24112	0.86445	1	Both
I49	Other cardiac arrhythmias	digestive	1.06799	0.121113	4.36241	0.712269	1	Both
I49	Other cardiac arrhythmias	menstrual_disturbances	0.435014	0.0105448	2.67942	0.719433	1	Both
I49	Other cardiac arrhythmias	chills	2.40957	0.452004	8.25963	0.152542	0.576867	Both
I49	Other cardiac arrhythmias	endocrin	0	0	3.46937	0.623038	0.990822	Both
I49	Other cardiac arrhythmias	cardiovascular	2.1623	0.717254	5.45824	0.121192	0.523956	Both
I49	Other cardiac arrhythmias	hematological	2.40476	0.0544858	17.3639	0.364928	0.806924	Both
I49	Other cardiac arrhythmias	respiratory_problems	1.04485	0.46115	2.21204	0.856234	1	Both
I49	Other cardiac arrhythmias	muscular	1.35184	0.665036	2.72942	0.400788	0.845877	Both
I49	Other cardiac arrhythmias	headache	0.961906	0.243293	2.7734	1	1	Both
I49	Other cardiac arrhythmias	cognitive	0.915039	0.375765	2.01929	1	1	Both
I49	Other cardiac arrhythmias	renal	5.43032	0.558938	26.8666	0.0694249	0.417707	Both
I49	Other cardiac arrhythmias	loss_taste_smell	1.7165	0.754397	3.65187	0.144887	0.572186	Both
J30	Vasomotor and allergic rhinitis	dry_eyes_mouth	1.13892	0.724405	1.75381	0.582696	0.974314	Both
J30	Vasomotor and allergic rhinitis	tingling_sensation	1.12046	0.529832	2.19986	0.731119	1	Both
J30	Vasomotor and allergic rhinitis	dermatological	0.853702	0.510011	1.38154	0.565137	0.960068	Both
J30	Vasomotor and allergic rhinitis	fever	1.4573	0.142767	8.23106	0.647574	0.998871	Both
J30	Vasomotor and allergic rhinitis	psychological	1.25164	0.84773	1.82671	0.244705	0.687849	Both
J30	Vasomotor and allergic rhinitis	abdominal_pain	0.508018	0.0564641	2.16914	0.552989	0.94611	Both
J30	Vasomotor and allergic rhinitis	tiredness	1.22549	0.876806	1.70749	0.215432	0.674875	Both
J30	Vasomotor and allergic rhinitis	digestive	1.21067	0.549237	2.46218	0.580981	0.974314	Both
J30	Vasomotor and allergic rhinitis	menstrual_disturbances	1.83744	0.957149	3.38971	0.0561564	0.38919	Both
J30	Vasomotor and allergic rhinitis	chills	0.838847	0.281966	2.08063	0.831668	1	Both
J30	Vasomotor and allergic rhinitis	endocrin	0.868564	0.256306	2.35121	1	1	Both
J30	Vasomotor and allergic rhinitis	cardiovascular	0.92864	0.48195	1.68587	0.885118	1	Both
J30	Vasomotor and allergic rhinitis	hematological	1.45972	0.251815	5.92173	0.476575	0.889244	Both
J30	Vasomotor and allergic rhinitis	respiratory_problems	1.28133	0.89669	1.81826	0.155003	0.576867	Both
J30	Vasomotor and allergic rhinitis	muscular	1.07563	0.770953	1.4962	0.683517	1	Both
J30	Vasomotor and allergic rhinitis	headache	1.21567	0.717507	1.99669	0.440921	0.884291	Both
J30	Vasomotor and allergic rhinitis	cognitive	1.16027	0.798063	1.67036	0.408446	0.852307	Both
J30	Vasomotor and allergic rhinitis	renal	0.870639	0.0920271	4.13433	1	1	Both
J30	Vasomotor and allergic rhinitis	loss_taste_smell	0.790727	0.504418	1.21086	0.312757	0.769116	Both
J45	Asthma	dry_eyes_mouth	0.926752	0.4834	1.67112	0.886152	1	Both
J45	Asthma	tingling_sensation	0.476941	0.0937386	1.51199	0.263381	0.723047	Both
J45	Asthma	dermatological	0.81323	0.393884	1.54567	0.650235	0.998871	Both
J45	Asthma	fever	1.31532	0.0289077	10.4076	0.563717	0.959915	Both
J45	Asthma	psychological	0.937558	0.536767	1.57676	0.899139	1	Both
J45	Asthma	abdominal_pain	0.505813	0.0120185	3.27189	1	1	Both
J45	Asthma	tiredness	0.842049	0.528545	1.32121	0.450674	0.884408	Both
J45	Asthma	digestive	2.37456	1.0257	5.02566	0.0262424	0.280991	Both
J45	Asthma	menstrual_disturbances	0.654778	0.168704	1.83215	0.64995	0.998871	Both
J45	Asthma	chills	0.805093	0.155351	2.63425	1	1	Both
J45	Asthma	endocrin	2.3761	0.774849	6.16365	0.108183	0.501312	Both
J45	Asthma	cardiovascular	1.40998	0.650411	2.79938	0.338721	0.778841	Both
J45	Asthma	hematological	1.85307	0.194758	8.87816	0.332668	0.778325	Both
J45	Asthma	respiratory_problems	1.33892	0.83728	2.10954	0.200202	0.663055	Both
J45	Asthma	muscular	0.806027	0.509803	1.25791	0.338196	0.778841	Both
J45	Asthma	headache	1.63047	0.855933	2.94594	0.0941951	0.472284	Both
J45	Asthma	cognitive	0.97005	0.577048	1.58489	1	1	Both
J45	Asthma	renal	0.83375	0.0191781	5.8463	1	1	Both
J45	Asthma	loss_taste_smell	1.32209	0.776253	2.18563	0.289689	0.748058	Both
K21	Gastro-esophageal reflux disease	dry_eyes_mouth	1.44508	0.785117	2.54435	0.21677	0.674875	Both
K21	Gastro-esophageal reflux disease	tingling_sensation	1.2422	0.423376	3.01153	0.627412	0.991674	Both
K21	Gastro-esophageal reflux disease	dermatological	1.82488	1.00065	3.19849	0.0349996	0.315871	Both
K21	Gastro-esophageal reflux disease	fever	6.66917	1.018	34.96	0.0239378	0.279286	Both
K21	Gastro-esophageal reflux disease	psychological	1.70079	1.00978	2.80446	0.0406046	0.329202	Both
K21	Gastro-esophageal reflux disease	abdominal_pain	2.97371	0.702307	9.62286	0.0691849	0.417707	Both
K21	Gastro-esophageal reflux disease	tiredness	0.979661	0.60045	1.57608	1	1	Both
K21	Gastro-esophageal reflux disease	digestive	2.84963	1.22433	6.07278	0.00779667	0.170582	Both
K21	Gastro-esophageal reflux disease	menstrual_disturbances	0.777392	0.199635	2.18588	0.81112	1	Both
K21	Gastro-esophageal reflux disease	chills	3.18261	1.2155	7.44598	0.00947101	0.182596	Both
K21	Gastro-esophageal reflux disease	endocrin	3.4894	1.226	8.73473	0.00987894	0.182887	Both
K21	Gastro-esophageal reflux disease	cardiovascular	1.31439	0.557276	2.76467	0.41893	0.857107	Both
K21	Gastro-esophageal reflux disease	hematological	0	0	3.92289	0.613825	0.988032	Both
K21	Gastro-esophageal reflux disease	respiratory_problems	1.55005	0.946718	2.50338	0.0623766	0.413961	Both
K21	Gastro-esophageal reflux disease	muscular	1.42956	0.896686	2.27562	0.111426	0.508951	Both
K21	Gastro-esophageal reflux disease	headache	1.81351	0.928393	3.34854	0.0690681	0.417707	Both
K21	Gastro-esophageal reflux disease	cognitive	1.4518	0.869357	2.3769	0.123264	0.526607	Both
K21	Gastro-esophageal reflux disease	renal	2.19064	0.229784	10.5254	0.269448	0.724271	Both
K21	Gastro-esophageal reflux disease	loss_taste_smell	0.704804	0.350813	1.31505	0.322233	0.770043	Both
K29	Gastritis and duodenitis	dry_eyes_mouth	1.19633	0.39728	3.02235	0.631154	0.992795	Both
K29	Gastritis and duodenitis	tingling_sensation	1.06278	0.120274	4.35967	0.713538	1	Both
K29	Gastritis and duodenitis	dermatological	1.1009	0.326381	2.95463	0.799272	1	Both
K29	Gastritis and duodenitis	fever	10.5687	1.00543	62.2788	0.0247566	0.279286	Both
K29	Gastritis and duodenitis	psychological	1.15542	0.443961	2.68965	0.672653	1	Both
K29	Gastritis and duodenitis	abdominal_pain	0	0	6.67987	1	1	Both
K29	Gastritis and duodenitis	tiredness	2.68006	1.25165	5.9385	0.00591975	0.147381	Both
K29	Gastritis and duodenitis	digestive	1.97327	0.372336	6.70124	0.221531	0.674875	Both
K29	Gastritis and duodenitis	menstrual_disturbances	0.505666	0.0122076	3.14316	1	1	Both
K29	Gastritis and duodenitis	chills	0.833465	0.0199203	5.29568	1	1	Both
K29	Gastritis and duodenitis	endocrin	3.58071	0.659318	12.6679	0.067667	0.417707	Both
K29	Gastritis and duodenitis	cardiovascular	1.11449	0.21312	3.70373	0.748975	1	Both
K29	Gastritis and duodenitis	hematological	2.79373	0.0630642	20.3245	0.325165	0.770043	Both
K29	Gastritis and duodenitis	respiratory_problems	1.48263	0.655563	3.20503	0.324425	0.770043	Both
K29	Gastritis and duodenitis	muscular	1.24658	0.57747	2.65376	0.589759	0.978864	Both
K29	Gastritis and duodenitis	headache	1.13393	0.284241	3.31829	0.775536	1	Both
K29	Gastritis and duodenitis	cognitive	1.72248	0.760804	3.7276	0.153719	0.576867	Both
K29	Gastritis and duodenitis	renal	0	0	11.2493	1	1	Both
K29	Gastritis and duodenitis	loss_taste_smell	1.11291	0.401801	2.68239	0.823364	1	Both
K76	Other diseases of liver	dry_eyes_mouth	1.8199	0.918866	3.42428	0.0674798	0.417707	Both
K76	Other diseases of liver	tingling_sensation	0.842476	0.163739	2.72102	1	1	Both
K76	Other diseases of liver	dermatological	0.656364	0.226532	1.56291	0.446225	0.884408	Both
K76	Other diseases of liver	fever	0	0	9.44246	1	1	Both
K76	Other diseases of liver	psychological	1.07511	0.535878	2.03328	0.872839	1	Both
K76	Other diseases of liver	abdominal_pain	1.89482	0.207552	8.28945	0.31216	0.769116	Both
K76	Other diseases of liver	tiredness	1.93842	1.11501	3.38232	0.0136847	0.207248	Both
K76	Other diseases of liver	digestive	1.78828	0.53358	4.74035	0.219766	0.674875	Both
K76	Other diseases of liver	menstrual_disturbances	0.542033	0.0625801	2.1418	0.572563	0.968128	Both
K76	Other diseases of liver	chills	1.42032	0.271122	4.73026	0.477676	0.889244	Both
K76	Other diseases of liver	endocrin	1.80133	0.339855	6.12307	0.416107	0.857107	Both
K76	Other diseases of liver	cardiovascular	0.361691	0.0420597	1.41021	0.225412	0.675058	Both
K76	Other diseases of liver	hematological	0	0	5.79274	1	1	Both
K76	Other diseases of liver	respiratory_problems	1.16928	0.630312	2.09847	0.560351	0.956438	Both
K76	Other diseases of liver	muscular	1.03362	0.584703	1.80206	0.89383	1	Both
K76	Other diseases of liver	headache	1.06538	0.398529	2.43166	0.832533	1	Both
K76	Other diseases of liver	cognitive	0.962295	0.489946	1.79286	1	1	Both
K76	Other diseases of liver	renal	5.49362	0.931858	22.7919	0.0297178	0.306518	Both
K76	Other diseases of liver	loss_taste_smell	0.699749	0.297829	1.46565	0.406256	0.850193	Both
M23	Internal derangement of knee	dry_eyes_mouth	1.31405	0.704317	2.33473	0.357701	0.799567	Both
M23	Internal derangement of knee	tingling_sensation	0.558029	0.10939	1.7763	0.471198	0.889244	Both
M23	Internal derangement of knee	dermatological	0.6804	0.292997	1.40148	0.337303	0.778841	Both
M23	Internal derangement of knee	fever	1.53289	0.0336471	12.1562	0.512154	0.908225	Both
M23	Internal derangement of knee	psychological	1.06251	0.596442	1.82107	0.788342	1	Both
M23	Internal derangement of knee	abdominal_pain	1.2637	0.139371	5.46682	0.67378	1	Both
M23	Internal derangement of knee	tiredness	1.60568	1.00857	2.55125	0.0378196	0.324704	Both
M23	Internal derangement of knee	digestive	1.17188	0.353712	3.05361	0.795344	1	Both
M23	Internal derangement of knee	menstrual_disturbances	0.558029	0.10939	1.7763	0.471198	0.889244	Both
M23	Internal derangement of knee	chills	2.14579	0.710948	5.42631	0.122662	0.526607	Both
M23	Internal derangement of knee	endocrin	1.67479	0.414982	4.99248	0.316044	0.769116	Both
M23	Internal derangement of knee	cardiovascular	3.06911	1.60222	5.6322	0.000414188	0.0244855	Both
M23	Internal derangement of knee	hematological	0.971813	0.0223236	6.83248	1	1	Both
M23	Internal derangement of knee	respiratory_problems	2.69663	1.68817	4.30419	1.76332e-05	0.00285379	Both
M23	Internal derangement of knee	muscular	1.32799	0.833759	2.1084	0.212505	0.674875	Both
M23	Internal derangement of knee	headache	1.62651	0.816703	3.04191	0.149133	0.576867	Both
M23	Internal derangement of knee	cognitive	1.12009	0.654351	1.86424	0.70036	1	Both
M23	Internal derangement of knee	renal	0.971813	0.0223236	6.83248	1	1	Both
M23	Internal derangement of knee	loss_taste_smell	0.763022	0.389029	1.39994	0.481541	0.891469	Both
M47	Spondylosis	dry_eyes_mouth	1.65306	0.770936	3.30633	0.168116	0.603881	Both
M47	Spondylosis	tingling_sensation	2.27152	0.75864	5.66943	0.113697	0.508951	Both
M47	Spondylosis	dermatological	0.641601	0.195722	1.64623	0.418257	0.857107	Both
M47	Spondylosis	fever	2.71295	0.059141	21.774	0.34052	0.780494	Both
M47	Spondylosis	psychological	2.1663	1.13861	4.01714	0.0144157	0.207248	Both
M47	Spondylosis	abdominal_pain	2.25627	0.246225	9.93559	0.248788	0.693531	Both
M47	Spondylosis	tiredness	1.60014	0.875993	2.91334	0.106114	0.501312	Both
M47	Spondylosis	digestive	2.69774	0.894563	6.80299	0.0386766	0.324704	Both
M47	Spondylosis	menstrual_disturbances	0.310907	0.00759053	1.88441	0.35733	0.799567	Both
M47	Spondylosis	chills	3.136	0.91247	8.63473	0.0344598	0.315871	Both
M47	Spondylosis	endocrin	1.35525	0.152266	5.63956	0.66059	1	Both
M47	Spondylosis	cardiovascular	1.1926	0.359967	3.10744	0.610561	0.988032	Both
M47	Spondylosis	hematological	0	0	6.88861	1	1	Both
M47	Spondylosis	respiratory_problems	2.11821	1.14802	3.86781	0.0108503	0.191071	Both
M47	Spondylosis	muscular	1.09429	0.592065	1.99413	0.772937	1	Both
M47	Spondylosis	headache	1.07173	0.365298	2.59896	0.819815	1	Both
M47	Spondylosis	cognitive	1.21106	0.60646	2.30683	0.516513	0.908225	Both
M47	Spondylosis	renal	1.72076	0.0392445	12.2651	0.46512	0.889244	Both
M47	Spondylosis	loss_taste_smell	0.424163	0.129929	1.08196	0.0721043	0.423247	Both
M51	Thoracic, thoracolum, and lumbosacral intvrt disc disorders	dry_eyes_mouth	0.880243	0.469803	1.55784	0.783377	1	Both
M51	Thoracic, thoracolum, and lumbosacral intvrt disc disorders	tingling_sensation	0.580727	0.149879	1.62019	0.390788	0.837948	Both
M51	Thoracic, thoracolum, and lumbosacral intvrt disc disorders	dermatological	0.713855	0.347012	1.35011	0.385707	0.831286	Both
M51	Thoracic, thoracolum, and lumbosacral intvrt disc disorders	fever	0	0	4.82227	1	1	Both
M51	Thoracic, thoracolum, and lumbosacral intvrt disc disorders	psychological	1.50976	0.939694	2.38098	0.0693266	0.417707	Both
M51	Thoracic, thoracolum, and lumbosacral intvrt disc disorders	abdominal_pain	1.5491	0.284754	5.53653	0.452113	0.884408	Both
M51	Thoracic, thoracolum, and lumbosacral intvrt disc disorders	tiredness	1.25002	0.819611	1.89541	0.300565	0.76232	Both
M51	Thoracic, thoracolum, and lumbosacral intvrt disc disorders	digestive	2.69791	1.24398	5.47379	0.0085308	0.17109	Both
M51	Thoracic, thoracolum, and lumbosacral intvrt disc disorders	menstrual_disturbances	1.1089	0.414113	2.53724	0.828693	1	Both
M51	Thoracic, thoracolum, and lumbosacral intvrt disc disorders	chills	1.61687	0.53886	4.05676	0.280643	0.736815	Both
M51	Thoracic, thoracolum, and lumbosacral intvrt disc disorders	endocrin	0.577525	0.0657837	2.34395	0.763689	1	Both
M51	Thoracic, thoracolum, and lumbosacral intvrt disc disorders	cardiovascular	2.04653	1.06465	3.73973	0.0268578	0.281033	Both
M51	Thoracic, thoracolum, and lumbosacral intvrt disc disorders	hematological	2.77278	0.475758	11.3267	0.133357	0.547066	Both
M51	Thoracic, thoracolum, and lumbosacral intvrt disc disorders	respiratory_problems	1.07849	0.677904	1.68522	0.738867	1	Both
M51	Thoracic, thoracolum, and lumbosacral intvrt disc disorders	muscular	1.56071	1.03226	2.36023	0.0317262	0.315871	Both
M51	Thoracic, thoracolum, and lumbosacral intvrt disc disorders	headache	0.783527	0.35324	1.56484	0.629068	0.991674	Both
M51	Thoracic, thoracolum, and lumbosacral intvrt disc disorders	cognitive	1.03757	0.638096	1.64861	0.908339	1	Both
M51	Thoracic, thoracolum, and lumbosacral intvrt disc disorders	renal	1.64812	0.173412	7.87984	0.38188	0.827981	Both
M51	Thoracic, thoracolum, and lumbosacral intvrt disc disorders	loss_taste_smell	0.768245	0.425302	1.32126	0.377693	0.822867	Both
N39	Other disorders of urinary system	dry_eyes_mouth	1.14124	0.418417	2.68545	0.664013	1	Both
N39	Other disorders of urinary system	tingling_sensation	0.860681	0.0981622	3.47961	1	1	Both
N39	Other disorders of urinary system	dermatological	0.674038	0.171646	1.92336	0.641683	0.998871	Both
N39	Other disorders of urinary system	fever	0	0	14.8805	1	1	Both
N39	Other disorders of urinary system	psychological	1.56998	0.714485	3.2529	0.238775	0.681405	Both
N39	Other disorders of urinary system	abdominal_pain	3.00396	0.32528	13.4074	0.166395	0.600687	Both
N39	Other disorders of urinary system	tiredness	1.12974	0.553065	2.24992	0.740003	1	Both
N39	Other disorders of urinary system	digestive	0.481819	0.0116633	2.97604	0.716764	1	Both
N39	Other disorders of urinary system	menstrual_disturbances	0	0	1.57261	0.163013	0.596049	Both
N39	Other disorders of urinary system	chills	0.678977	0.0163134	4.2634	1	1	Both
N39	Other disorders of urinary system	endocrin	0.848929	0.0202692	5.40686	1	1	Both
N39	Other disorders of urinary system	cardiovascular	1.62229	0.482669	4.32243	0.370484	0.815516	Both
N39	Other disorders of urinary system	hematological	0	0	9.14512	1	1	Both
N39	Other disorders of urinary system	respiratory_problems	1.94704	0.960398	3.87489	0.0476856	0.357655	Both
N39	Other disorders of urinary system	muscular	1.10207	0.545119	2.18673	0.869595	1	Both
N39	Other disorders of urinary system	headache	2.12538	0.823862	4.87034	0.0687942	0.417707	Both
N39	Other disorders of urinary system	cognitive	1.12712	0.500356	2.36591	0.713161	1	Both
N39	Other disorders of urinary system	renal	0	0	9.14512	1	1	Both
N39	Other disorders of urinary system	loss_taste_smell	0.869374	0.319678	2.03806	0.841296	1	Both
E03	Other hypothyroidism	dry_eyes_mouth	1.07533	0.591722	1.87526	0.780651	1	Women
E03	Other hypothyroidism	tingling_sensation	0.301928	0.0347834	1.19842	0.10333	0.497364	Women
E03	Other hypothyroidism	dermatological	1.36399	0.755705	2.37271	0.244844	0.687849	Women
E03	Other hypothyroidism	fever	9.41464	1.06488	114.079	0.0215509	0.268256	Women
E03	Other hypothyroidism	psychological	1.17516	0.683384	1.96405	0.51548	0.908225	Women
E03	Other hypothyroidism	abdominal_pain	0.611129	0.0139425	4.378	1	1	Women
E03	Other hypothyroidism	tiredness	1.16584	0.742204	1.81837	0.511049	0.908225	Women
E03	Other hypothyroidism	digestive	0.483624	0.0936295	1.57338	0.345589	0.787966	Women
E03	Other hypothyroidism	menstrual_disturbances	0.42498	0.109398	1.19035	0.116772	0.514084	Women
E03	Other hypothyroidism	chills	0.982648	0.243355	2.93289	1	1	Women
E03	Other hypothyroidism	endocrin	2.35278	0.813514	6.04079	0.0764411	0.428105	Women
E03	Other hypothyroidism	cardiovascular	1.48984	0.671744	3.04911	0.241153	0.682793	Women
E03	Other hypothyroidism	hematological	0.876924	0.019267	6.94147	1	1	Women
E03	Other hypothyroidism	respiratory_problems	1.49559	0.928126	2.37894	0.0923262	0.471186	Women
E03	Other hypothyroidism	muscular	1.08384	0.693128	1.68536	0.746293	1	Women
E03	Other hypothyroidism	headache	1.59853	0.855073	2.86691	0.108317	0.501312	Women
E03	Other hypothyroidism	cognitive	0.949993	0.564131	1.5594	0.903977	1	Women
E03	Other hypothyroidism	renal	2.05629	0.038841	25.8985	0.453581	0.884408	Women
E03	Other hypothyroidism	loss_taste_smell	0.725894	0.383764	1.29965	0.287378	0.746355	Women
F32	Major depressive disorder, single episode	dry_eyes_mouth	1.18988	0.700286	1.96664	0.521071	0.913139	Women
F32	Major depressive disorder, single episode	tingling_sensation	1.59245	0.67717	3.44725	0.206231	0.670717	Women
F32	Major depressive disorder, single episode	dermatological	1.0113	0.565737	1.73865	1	1	Women
F32	Major depressive disorder, single episode	fever	1.20005	0.0241851	12.2639	1	1	Women
F32	Major depressive disorder, single episode	psychological	1.56546	0.978604	2.46723	0.0544087	0.38919	Women
F32	Major depressive disorder, single episode	abdominal_pain	1.06658	0.110836	5.24192	1	1	Women
F32	Major depressive disorder, single episode	tiredness	1.49601	0.996269	2.24189	0.0441704	0.342654	Women
F32	Major depressive disorder, single episode	digestive	1.64828	0.698989	3.58213	0.195987	0.655105	Women
F32	Major depressive disorder, single episode	menstrual_disturbances	0.520595	0.178756	1.24855	0.152705	0.576867	Women
F32	Major depressive disorder, single episode	chills	1.26295	0.411718	3.27965	0.616252	0.988032	Women
F32	Major depressive disorder, single episode	endocrin	0.867862	0.21363	2.61925	1	1	Women
F32	Major depressive disorder, single episode	cardiovascular	1.27667	0.596366	2.54478	0.469961	0.889244	Women
F32	Major depressive disorder, single episode	hematological	2.91662	0.447193	15.2119	0.145028	0.572186	Women
F32	Major depressive disorder, single episode	respiratory_problems	1.26466	0.808692	1.95284	0.272213	0.725426	Women
F32	Major depressive disorder, single episode	muscular	1.77578	1.1872	2.66129	0.00393674	0.10932	Women
F32	Major depressive disorder, single episode	headache	1.3934	0.770188	2.4313	0.238043	0.681405	Women
F32	Major depressive disorder, single episode	cognitive	1.14854	0.726755	1.78789	0.507652	0.908225	Women
F32	Major depressive disorder, single episode	renal	1.60198	0.0303004	20.1353	0.532031	0.925606	Women
F32	Major depressive disorder, single episode	loss_taste_smell	0.416508	0.208392	0.771498	0.00299926	0.093595	Women
F39	Unspecified mood [affective] disorder	dry_eyes_mouth	1.24805	0.601831	2.4258	0.489789	0.897561	Women
F39	Unspecified mood [affective] disorder	tingling_sensation	1.91669	0.632063	4.87413	0.151428	0.576867	Women
F39	Unspecified mood [affective] disorder	dermatological	0.441622	0.135131	1.12709	0.100605	0.490482	Women
F39	Unspecified mood [affective] disorder	fever	0	0	11.8023	1	1	Women
F39	Unspecified mood [affective] disorder	psychological	0.880017	0.415535	1.72972	0.871283	1	Women
F39	Unspecified mood [affective] disorder	abdominal_pain	1.06928	0.0242545	7.74066	1	1	Women
F39	Unspecified mood [affective] disorder	tiredness	1.68021	0.965756	2.92072	0.0565996	0.38919	Women
F39	Unspecified mood [affective] disorder	digestive	1.57028	0.462411	4.24612	0.376724	0.822867	Women
F39	Unspecified mood [affective] disorder	menstrual_disturbances	0.988202	0.296765	2.59325	1	1	Women
F39	Unspecified mood [affective] disorder	chills	1.24383	0.234177	4.24314	0.730602	1	Women
F39	Unspecified mood [affective] disorder	endocrin	0.886737	0.0992538	3.7171	1	1	Women
F39	Unspecified mood [affective] disorder	cardiovascular	1.00845	0.302678	2.64913	1	1	Women
F39	Unspecified mood [affective] disorder	hematological	1.53349	0.0335151	12.253	0.512987	0.908225	Women
F39	Unspecified mood [affective] disorder	respiratory_problems	1.3029	0.705737	2.33552	0.372545	0.817561	Women
F39	Unspecified mood [affective] disorder	muscular	1.65084	0.951285	2.875	0.0612417	0.413238	Women
F39	Unspecified mood [affective] disorder	headache	1.35925	0.592919	2.83654	0.423836	0.862803	Women
F39	Unspecified mood [affective] disorder	cognitive	1.58658	0.873484	2.81691	0.100214	0.490482	Women
F39	Unspecified mood [affective] disorder	renal	3.59179	0.0675378	45.4817	0.301419	0.76232	Women
F39	Unspecified mood [affective] disorder	loss_taste_smell	0.664547	0.281276	1.40154	0.320975	0.770043	Women
F41	Other anxiety disorders	dry_eyes_mouth	1.06602	0.711426	1.59147	0.768788	1	Women
F41	Other anxiety disorders	tingling_sensation	2.01698	1.01818	4.07913	0.0340438	0.315871	Women
F41	Other anxiety disorders	dermatological	0.901661	0.586404	1.3768	0.681122	1	Women
F41	Other anxiety disorders	fever	0.341855	0.00691544	3.47647	0.404127	0.848197	Women
F41	Other anxiety disorders	psychological	1.95279	1.34386	2.84586	0.000324961	0.0244855	Women
F41	Other anxiety disorders	abdominal_pain	1.66063	0.418033	6.94548	0.540615	0.936029	Women
F41	Other anxiety disorders	tiredness	1.65548	1.21056	2.26602	0.0012	0.0512036	Women
F41	Other anxiety disorders	digestive	1.92634	0.965263	3.91673	0.048546	0.357655	Women
F41	Other anxiety disorders	menstrual_disturbances	0.742236	0.404579	1.32923	0.33663	0.778841	Women
F41	Other anxiety disorders	chills	2.71244	1.17971	6.63177	0.0118859	0.204324	Women
F41	Other anxiety disorders	endocrin	2.68465	1.11376	6.93356	0.0242241	0.279286	Women
F41	Other anxiety disorders	cardiovascular	1.6408	0.924784	2.92739	0.0729349	0.42467	Women
F41	Other anxiety disorders	hematological	0.194038	0.00428886	1.52285	0.147966	0.576867	Women
F41	Other anxiety disorders	respiratory_problems	1.52593	1.08409	2.14887	0.0143622	0.207248	Women
F41	Other anxiety disorders	muscular	1.43716	1.05602	1.95714	0.0186384	0.236086	Women
F41	Other anxiety disorders	headache	1.43864	0.905944	2.28507	0.114197	0.508951	Women
F41	Other anxiety disorders	cognitive	1.1924	0.843516	1.6835	0.308512	0.768088	Women
F41	Other anxiety disorders	renal	4.14543	0.331064	218.272	0.315421	0.769116	Women
F41	Other anxiety disorders	loss_taste_smell	0.679568	0.454493	1.00745	0.0483362	0.357655	Women
F43	Reaction to severe stress, and adjustment disorders	dry_eyes_mouth	0.842618	0.434875	1.53939	0.667665	1	Women
F43	Reaction to severe stress, and adjustment disorders	tingling_sensation	1.64934	0.637431	3.79274	0.232328	0.677122	Women
F43	Reaction to severe stress, and adjustment disorders	dermatological	0.658337	0.306033	1.2935	0.233448	0.677122	Women
F43	Reaction to severe stress, and adjustment disorders	fever	1.65229	0.0332361	16.9208	0.507716	0.908225	Women
F43	Reaction to severe stress, and adjustment disorders	psychological	2.89847	1.78523	4.67193	1.16581e-05	0.00285379	Women
F43	Reaction to severe stress, and adjustment disorders	abdominal_pain	0.655532	0.0149474	4.70076	1	1	Women
F43	Reaction to severe stress, and adjustment disorders	tiredness	1.92906	1.22643	3.03893	0.00330301	0.095391	Women
F43	Reaction to severe stress, and adjustment disorders	digestive	1.4275	0.517231	3.41179	0.467479	0.889244	Women
F43	Reaction to severe stress, and adjustment disorders	menstrual_disturbances	0.729293	0.248965	1.76346	0.687133	1	Women
F43	Reaction to severe stress, and adjustment disorders	chills	2.64052	0.980827	6.43936	0.0425718	0.334096	Women
F43	Reaction to severe stress, and adjustment disorders	endocrin	0.85494	0.161197	2.91344	1	1	Women
F43	Reaction to severe stress, and adjustment disorders	cardiovascular	1.41449	0.61494	2.96579	0.316476	0.769116	Women
F43	Reaction to severe stress, and adjustment disorders	hematological	2.2179	0.215939	12.6344	0.284938	0.742692	Women
F43	Reaction to severe stress, and adjustment disorders	respiratory_problems	2.04484	1.27424	3.25657	0.00199406	0.0757744	Women
F43	Reaction to severe stress, and adjustment disorders	muscular	1.48396	0.944157	2.33196	0.0765753	0.428105	Women
F43	Reaction to severe stress, and adjustment disorders	headache	1.33456	0.679599	2.47951	0.326379	0.770043	Women
F43	Reaction to severe stress, and adjustment disorders	cognitive	1.04338	0.616939	1.72171	0.901317	1	Women
F43	Reaction to severe stress, and adjustment disorders	renal	0	0	10.0404	1	1	Women
F43	Reaction to severe stress, and adjustment disorders	loss_taste_smell	0.788833	0.415876	1.41743	0.49263	0.898048	Women
G43	Migraine	dry_eyes_mouth	1.34505	0.78838	2.23419	0.234461	0.677122	Women
G43	Migraine	tingling_sensation	1.77106	0.751558	3.84368	0.127082	0.534503	Women
G43	Migraine	dermatological	1.70003	0.997444	2.82967	0.0373595	0.324704	Women
G43	Migraine	fever	1.32487	0.0266864	13.5501	0.580295	0.974314	Women
G43	Migraine	psychological	1.88523	1.17568	2.98419	0.00618389	0.148826	Women
G43	Migraine	abdominal_pain	3.08826	0.652076	12.3869	0.0814008	0.445238	Women
G43	Migraine	tiredness	1.45948	0.957992	2.21752	0.0765706	0.428105	Women
G43	Migraine	digestive	4.39246	2.122	8.93988	3.17093e-05	0.00381568	Women
G43	Migraine	menstrual_disturbances	1.2341	0.559317	2.50875	0.576921	0.973218	Women
G43	Migraine	chills	2.08742	0.779031	5.06181	0.113529	0.508951	Women
G43	Migraine	endocrin	2.00728	0.696035	5.13544	0.164925	0.598372	Women
G43	Migraine	cardiovascular	1.77461	0.865813	3.44525	0.0902897	0.471186	Women
G43	Migraine	hematological	1.77515	0.173168	10.0868	0.619915	0.988032	Women
G43	Migraine	respiratory_problems	0.884805	0.540034	1.41743	0.649782	0.998871	Women
G43	Migraine	muscular	1.2818	0.843171	1.94429	0.220882	0.674875	Women
G43	Migraine	headache	1.81464	1.01897	3.13651	0.0320871	0.315871	Women
G43	Migraine	cognitive	1.38387	0.873312	2.16441	0.137443	0.553736	Women
G43	Migraine	renal	16.1653	1.28506	850.473	0.0138892	0.207248	Women
G43	Migraine	loss_taste_smell	0.711681	0.390245	1.23802	0.252966	0.702467	Women
I49	Other cardiac arrhythmias	dry_eyes_mouth	0.554663	0.105562	1.86058	0.450895	0.884408	Women
I49	Other cardiac arrhythmias	tingling_sensation	1.31896	0.146538	5.60048	0.6653	1	Women
I49	Other cardiac arrhythmias	dermatological	0.638911	0.12143	2.14817	0.602072	0.988032	Women
I49	Other cardiac arrhythmias	fever	0	0	28.5342	1	1	Women
I49	Other cardiac arrhythmias	psychological	1.0319	0.336052	2.68619	1	1	Women
I49	Other cardiac arrhythmias	abdominal_pain	0	0	10.4807	1	1	Women
I49	Other cardiac arrhythmias	tiredness	0.777955	0.305335	1.8358	0.691489	1	Women
I49	Other cardiac arrhythmias	digestive	0.635682	0.0151375	4.07513	1	1	Women
I49	Other cardiac arrhythmias	menstrual_disturbances	0.415424	0.00997147	2.61779	0.718666	1	Women
I49	Other cardiac arrhythmias	chills	1.93786	0.212212	8.44674	0.303315	0.76232	Women
I49	Other cardiac arrhythmias	endocrin	0	0	3.95741	0.618069	0.988032	Women
I49	Other cardiac arrhythmias	cardiovascular	2.01601	0.490629	6.17655	0.26782	0.724271	Women
I49	Other cardiac arrhythmias	hematological	0	0	15.4081	1	1	Women
I49	Other cardiac arrhythmias	respiratory_problems	1.30969	0.512465	3.10195	0.517009	0.908225	Women
I49	Other cardiac arrhythmias	muscular	1.45754	0.633492	3.35373	0.334184	0.778325	Women
I49	Other cardiac arrhythmias	headache	1.17395	0.289267	3.53206	0.769359	1	Women
I49	Other cardiac arrhythmias	cognitive	0.765672	0.250027	1.98624	0.665545	1	Women
I49	Other cardiac arrhythmias	renal	0	0	39.4632	1	1	Women
I49	Other cardiac arrhythmias	loss_taste_smell	1.68099	0.626567	4.08869	0.226266	0.675058	Women
J30	Vasomotor and allergic rhinitis	dry_eyes_mouth	1.21683	0.744308	1.9483	0.40185	0.845877	Women
J30	Vasomotor and allergic rhinitis	tingling_sensation	1.09517	0.449215	2.41547	0.842299	1	Women
J30	Vasomotor and allergic rhinitis	dermatological	0.843977	0.480203	1.429	0.6151	0.988032	Women
J30	Vasomotor and allergic rhinitis	fever	2.59986	0.215331	22.9076	0.273074	0.725426	Women
J30	Vasomotor and allergic rhinitis	psychological	1.29777	0.825122	2.01137	0.261503	0.720629	Women
J30	Vasomotor and allergic rhinitis	abdominal_pain	0.859231	0.0894298	4.21354	1	1	Women
J30	Vasomotor and allergic rhinitis	tiredness	1.15763	0.787627	1.69415	0.4517	0.884408	Women
J30	Vasomotor and allergic rhinitis	digestive	1.31154	0.55821	2.83754	0.428336	0.863851	Women
J30	Vasomotor and allergic rhinitis	menstrual_disturbances	1.63895	0.84699	3.05105	0.128431	0.535996	Women
J30	Vasomotor and allergic rhinitis	chills	0.800744	0.234557	2.19088	0.816147	1	Women
J30	Vasomotor and allergic rhinitis	endocrin	0.696668	0.171888	2.09583	0.627252	0.991674	Women
J30	Vasomotor and allergic rhinitis	cardiovascular	1.01156	0.474489	2.00592	1	1	Women
J30	Vasomotor and allergic rhinitis	hematological	1.29481	0.126618	7.33592	0.67034	1	Women
J30	Vasomotor and allergic rhinitis	respiratory_problems	1.209	0.794563	1.8207	0.35446	0.797259	Women
J30	Vasomotor and allergic rhinitis	muscular	1.03639	0.707473	1.51243	0.853245	1	Women
J30	Vasomotor and allergic rhinitis	headache	1.34318	0.768475	2.28049	0.269846	0.724271	Women
J30	Vasomotor and allergic rhinitis	cognitive	1.11725	0.728082	1.69367	0.603845	0.988032	Women
J30	Vasomotor and allergic rhinitis	renal	1.29285	0.0244749	16.2301	1	1	Women
J30	Vasomotor and allergic rhinitis	loss_taste_smell	0.647576	0.37568	1.07599	0.0854902	0.460626	Women
J45	Asthma	dry_eyes_mouth	0.764392	0.352961	1.5158	0.526823	0.920983	Women
J45	Asthma	tingling_sensation	0.20387	0.00497008	1.24081	0.111487	0.508951	Women
J45	Asthma	dermatological	0.787734	0.349807	1.60534	0.619127	0.988032	Women
J45	Asthma	fever	2.1516	0.0431887	22.1093	0.425427	0.862803	Women
J45	Asthma	psychological	0.99027	0.516133	1.80603	1	1	Women
J45	Asthma	abdominal_pain	0.854096	0.0194249	6.15277	1	1	Women
J45	Asthma	tiredness	0.776741	0.449762	1.31175	0.384405	0.830958	Women
J45	Asthma	digestive	2.26853	0.868017	5.28566	0.0580767	0.395579	Women
J45	Asthma	menstrual_disturbances	0.602096	0.153998	1.70325	0.503686	0.908225	Women
J45	Asthma	chills	0.987023	0.186727	3.34095	1	1	Women
J45	Asthma	endocrin	2.107	0.602289	5.97815	0.178964	0.621213	Women
J45	Asthma	cardiovascular	1.19184	0.439264	2.77709	0.654966	1	Women
J45	Asthma	hematological	1.2252	0.0268441	9.74632	0.58874	0.978864	Women
J45	Asthma	respiratory_problems	1.45409	0.84218	2.46215	0.172988	0.615257	Women
J45	Asthma	muscular	0.75432	0.442256	1.26329	0.273291	0.725426	Women
J45	Asthma	headache	1.82697	0.918817	3.448	0.0663921	0.417707	Women
J45	Asthma	cognitive	0.85057	0.458765	1.51137	0.680858	1	Women
J45	Asthma	renal	0	0	13.0816	1	1	Women
J45	Asthma	loss_taste_smell	1.18662	0.626861	2.14613	0.545563	0.937848	Women
K21	Gastro-esophageal reflux disease	dry_eyes_mouth	1.76673	0.899147	3.32176	0.0770826	0.428105	Women
K21	Gastro-esophageal reflux disease	tingling_sensation	1.20972	0.302476	3.54681	0.767884	1	Women
K21	Gastro-esophageal reflux disease	dermatological	1.69146	0.828343	3.26717	0.13805	0.553736	Women
K21	Gastro-esophageal reflux disease	fever	2.78987	0.0558505	28.7842	0.351971	0.795803	Women
K21	Gastro-esophageal reflux disease	psychological	2.13688	1.15606	3.8557	0.0125931	0.207248	Women
K21	Gastro-esophageal reflux disease	abdominal_pain	4.29773	0.71526	18.5312	0.0553253	0.38919	Women
K21	Gastro-esophageal reflux disease	tiredness	1.08182	0.604044	1.90625	0.78377	1	Women
K21	Gastro-esophageal reflux disease	digestive	2.51747	0.897157	6.15266	0.0396502	0.325312	Women
K21	Gastro-esophageal reflux disease	menstrual_disturbances	0.791301	0.201008	2.26279	0.80892	1	Women
K21	Gastro-esophageal reflux disease	chills	3.08529	0.985638	8.23193	0.0264646	0.280991	Women
K21	Gastro-esophageal reflux disease	endocrin	3.56276	1.12358	9.69937	0.0156346	0.212695	Women
K21	Gastro-esophageal reflux disease	cardiovascular	1.30647	0.438816	3.23348	0.616755	0.988032	Women
K21	Gastro-esophageal reflux disease	hematological	0	0	6.56699	1	1	Women
K21	Gastro-esophageal reflux disease	respiratory_problems	1.74124	0.961413	3.0961	0.0499237	0.36409	Women
K21	Gastro-esophageal reflux disease	muscular	1.24138	0.705009	2.17297	0.418762	0.857107	Women
K21	Gastro-esophageal reflux disease	headache	1.41723	0.616994	2.9655	0.315926	0.769116	Women
K21	Gastro-esophageal reflux disease	cognitive	1.42581	0.768982	2.57025	0.224338	0.675058	Women
K21	Gastro-esophageal reflux disease	renal	0	0	16.9632	1	1	Women
K21	Gastro-esophageal reflux disease	loss_taste_smell	0.692636	0.292646	1.46456	0.400255	0.845877	Women
K76	Other diseases of liver	dry_eyes_mouth	1.46084	0.624562	3.13845	0.30366	0.76232	Women
K76	Other diseases of liver	tingling_sensation	0.389037	0.00938638	2.42139	0.504003	0.908225	Women
K76	Other diseases of liver	dermatological	0.868992	0.292632	2.14559	1	1	Women
K76	Other diseases of liver	fever	0	0	17.9495	1	1	Women
K76	Other diseases of liver	psychological	1.15503	0.495695	2.47011	0.700084	1	Women
K76	Other diseases of liver	abdominal_pain	1.62485	0.0366107	11.9179	0.486695	0.897561	Women
K76	Other diseases of liver	tiredness	1.98569	1.02041	3.89476	0.0342749	0.315871	Women
K76	Other diseases of liver	digestive	1.86982	0.460362	5.61573	0.283707	0.742162	Women
K76	Other diseases of liver	menstrual_disturbances	0.544647	0.0622362	2.19398	0.567539	0.961885	Women
K76	Other diseases of liver	chills	1.92184	0.357287	6.69042	0.236683	0.680816	Women
K76	Other diseases of liver	endocrin	2.18158	0.402543	7.69458	0.189594	0.645451	Women
K76	Other diseases of liver	cardiovascular	0	0	1.01476	0.0410362	0.329202	Women
K76	Other diseases of liver	hematological	0	0	9.65418	1	1	Women
K76	Other diseases of liver	respiratory_problems	1.19839	0.561046	2.42908	0.596614	0.983459	Women
K76	Other diseases of liver	muscular	1.14672	0.581915	2.23057	0.749744	1	Women
K76	Other diseases of liver	headache	1.39015	0.50582	3.30141	0.47296	0.889244	Women
K76	Other diseases of liver	cognitive	1.24397	0.582097	2.52267	0.591166	0.978949	Women
K76	Other diseases of liver	renal	5.44928	0.101912	69.4946	0.2144	0.674875	Women
K76	Other diseases of liver	loss_taste_smell	0.936235	0.366639	2.11482	1	1	Women
M51	Thoracic, thoracolum, and lumbosacral intvrt disc disorders	dry_eyes_mouth	0.739199	0.341709	1.46337	0.435671	0.876196	Women
M51	Thoracic, thoracolum, and lumbosacral intvrt disc disorders	tingling_sensation	0.643337	0.124083	2.10561	0.609061	0.988032	Women
M51	Thoracic, thoracolum, and lumbosacral intvrt disc disorders	dermatological	0.762171	0.33886	1.55075	0.514459	0.908225	Women
M51	Thoracic, thoracolum, and lumbosacral intvrt disc disorders	fever	0	0	9.15598	1	1	Women
M51	Thoracic, thoracolum, and lumbosacral intvrt disc disorders	psychological	1.22411	0.666274	2.16471	0.465962	0.889244	Women
M51	Thoracic, thoracolum, and lumbosacral intvrt disc disorders	abdominal_pain	1.86805	0.193029	9.26411	0.33409	0.778325	Women
M51	Thoracic, thoracolum, and lumbosacral intvrt disc disorders	tiredness	1.28677	0.776255	2.11736	0.325834	0.770043	Women
M51	Thoracic, thoracolum, and lumbosacral intvrt disc disorders	digestive	1.83643	0.661261	4.426	0.182636	0.630926	Women
M51	Thoracic, thoracolum, and lumbosacral intvrt disc disorders	menstrual_disturbances	1.13091	0.417557	2.62839	0.825592	1	Women
M51	Thoracic, thoracolum, and lumbosacral intvrt disc disorders	chills	1.78038	0.515008	4.95678	0.225902	0.675058	Women
M51	Thoracic, thoracolum, and lumbosacral intvrt disc disorders	endocrin	0.685372	0.077043	2.85134	1	1	Women
M51	Thoracic, thoracolum, and lumbosacral intvrt disc disorders	cardiovascular	1.59415	0.659868	3.46352	0.264822	0.724248	Women
M51	Thoracic, thoracolum, and lumbosacral intvrt disc disorders	hematological	2.81241	0.273086	16.0796	0.208458	0.671905	Women
M51	Thoracic, thoracolum, and lumbosacral intvrt disc disorders	respiratory_problems	1.13986	0.648758	1.94948	0.593645	0.980805	Women
M51	Thoracic, thoracolum, and lumbosacral intvrt disc disorders	muscular	1.23027	0.74597	2.01966	0.398699	0.845877	Women
M51	Thoracic, thoracolum, and lumbosacral intvrt disc disorders	headache	0.889294	0.3761	1.8766	0.858399	1	Women
M51	Thoracic, thoracolum, and lumbosacral intvrt disc disorders	cognitive	0.819335	0.442757	1.45232	0.587544	0.978864	Women
M51	Thoracic, thoracolum, and lumbosacral intvrt disc disorders	renal	0	0	12.7069	1	1	Women
M51	Thoracic, thoracolum, and lumbosacral intvrt disc disorders	loss_taste_smell	0.56601	0.253012	1.1434	0.132103	0.545019	Women
N39	Other disorders of urinary system	dry_eyes_mouth	1.06602	0.387066	2.54275	0.828258	1	Women
N39	Other disorders of urinary system	tingling_sensation	0.938822	0.105705	3.88648	1	1	Women
N39	Other disorders of urinary system	dermatological	0.622502	0.157351	1.79634	0.493802	0.898048	Women
N39	Other disorders of urinary system	fever	0	0	20.5329	1	1	Women
N39	Other disorders of urinary system	psychological	1.58009	0.690078	3.38678	0.220409	0.674875	Women
N39	Other disorders of urinary system	abdominal_pain	4.23747	0.430396	21.5766	0.106415	0.501312	Women
N39	Other disorders of urinary system	tiredness	1.08517	0.516627	2.21609	0.863995	1	Women
N39	Other disorders of urinary system	digestive	0.457044	0.0109869	2.868	0.715071	1	Women
N39	Other disorders of urinary system	menstrual_disturbances	0	0	1.14151	0.0642373	0.417707	Women
N39	Other disorders of urinary system	chills	0.647009	0.0154077	4.1474	1	1	Women
N39	Other disorders of urinary system	endocrin	0.727824	0.01726	4.70855	1	1	Women
N39	Other disorders of urinary system	cardiovascular	1.40231	0.348598	4.15022	0.531018	0.925606	Women
N39	Other disorders of urinary system	hematological	0	0	11.0486	1	1	Women
N39	Other disorders of urinary system	respiratory_problems	2.07506	0.994963	4.24051	0.0373899	0.324704	Women
N39	Other disorders of urinary system	muscular	1.04758	0.504718	2.12995	1	1	Women
N39	Other disorders of urinary system	headache	1.94707	0.745985	4.53288	0.125384	0.532513	Women
N39	Other disorders of urinary system	cognitive	1.16343	0.509995	2.48267	0.705172	1	Women
N39	Other disorders of urinary system	renal	0	0	28.4157	1	1	Women
N39	Other disorders of urinary system	loss_taste_smell	0.924754	0.336446	2.20001	1	1	Women
F51	Sleep disorders not due to a substance or known physiol cond	dry_eyes_mouth	0.863378	0.158159	3.0758	1	1	Men
F51	Sleep disorders not due to a substance or known physiol cond	tingling_sensation	1.83227	0.319991	7.09213	0.41031	0.85373	Men
F51	Sleep disorders not due to a substance or known physiol cond	dermatological	1.01278	0.184154	3.65381	1	1	Men
F51	Sleep disorders not due to a substance or known physiol cond	fever	4.4611	0.0737553	88.3685	0.277639	0.73427	Men
F51	Sleep disorders not due to a substance or known physiol cond	psychological	0.326	0.0613425	1.11206	0.0705201	0.420789	Men
F51	Sleep disorders not due to a substance or known physiol cond	abdominal_pain	0	0	5.24933	1	1	Men
F51	Sleep disorders not due to a substance or known physiol cond	tiredness	1.62361	0.699813	3.72866	0.231349	0.677122	Men
F51	Sleep disorders not due to a substance or known physiol cond	digestive	3.51814	0.568037	15.8153	0.090967	0.471186	Men
F51	Sleep disorders not due to a substance or known physiol cond	menstrual_disturbances	0	0	Inf	1	1	Men
F51	Sleep disorders not due to a substance or known physiol cond	chills	0	0	5.24933	1	1	Men
F51	Sleep disorders not due to a substance or known physiol cond	endocrin	0	0	13.5804	1	1	Men
F51	Sleep disorders not due to a substance or known physiol cond	cardiovascular	2.18335	0.594082	6.63868	0.17291	0.615257	Men
F51	Sleep disorders not due to a substance or known physiol cond	hematological	0	0	13.5804	1	1	Men
F51	Sleep disorders not due to a substance or known physiol cond	respiratory_problems	1.10328	0.440495	2.60182	0.836744	1	Men
F51	Sleep disorders not due to a substance or known physiol cond	muscular	1.47115	0.634923	3.37439	0.327428	0.770043	Men
F51	Sleep disorders not due to a substance or known physiol cond	headache	1.60478	0.283364	6.09067	0.442733	0.884408	Men
F51	Sleep disorders not due to a substance or known physiol cond	cognitive	1.47969	0.565195	3.59252	0.364419	0.806924	Men
F51	Sleep disorders not due to a substance or known physiol cond	renal	0	0	5.24933	1	1	Men
F51	Sleep disorders not due to a substance or known physiol cond	loss_taste_smell	0.431022	0.0806919	1.48227	0.225051	0.675058	Men
G44	Other headache syndromes	dry_eyes_mouth	0	0	2.03081	0.231344	0.677122	Men
G44	Other headache syndromes	tingling_sensation	1.01954	0.0228905	7.45384	1	1	Men
G44	Other headache syndromes	dermatological	0.593734	0.0136067	4.15368	1	1	Men
G44	Other headache syndromes	fever	0	0	43.6222	1	1	Men
G44	Other headache syndromes	psychological	1.06543	0.242227	3.67054	1	1	Men
G44	Other headache syndromes	abdominal_pain	2.55906	0.0535284	22.1799	0.365463	0.806924	Men
G44	Other headache syndromes	tiredness	1.06178	0.307593	3.33749	1	1	Men
G44	Other headache syndromes	digestive	4.21646	0.406614	23.3838	0.115296	0.510696	Men
G44	Other headache syndromes	menstrual_disturbances	0	0	Inf	1	1	Men
G44	Other headache syndromes	chills	2.55906	0.0535284	22.1799	0.365463	0.806924	Men
G44	Other headache syndromes	endocrin	0	0	27.5954	1	1	Men
G44	Other headache syndromes	cardiovascular	0.644414	0.0147321	4.53153	1	1	Men
G44	Other headache syndromes	hematological	0	0	27.5954	1	1	Men
G44	Other headache syndromes	respiratory_problems	1.75313	0.535928	5.49073	0.278729	0.734462	Men
G44	Other headache syndromes	muscular	2.16599	0.694208	7.06692	0.184154	0.632297	Men
G44	Other headache syndromes	headache	2.04892	0.210308	10.0741	0.29935	0.76232	Men
G44	Other headache syndromes	cognitive	0.753354	0.133664	2.86009	1	1	Men
G44	Other headache syndromes	renal	6.36504	0.578912	40.1054	0.0646454	0.417707	Men
G44	Other headache syndromes	loss_taste_smell	0.577565	0.0619384	2.63153	0.745589	1	Men
M47	Spondylosis	dry_eyes_mouth	2.24477	0.508256	7.70802	0.247638	0.693003	Men
M47	Spondylosis	tingling_sensation	0.840313	0.0190515	6.00999	1	1	Men
M47	Spondylosis	dermatological	0	0	1.93335	0.233956	0.677122	Men
M47	Spondylosis	fever	0	0	36.0927	1	1	Men
M47	Spondylosis	psychological	2.47761	0.826405	7.1092	0.089687	0.471186	Men
M47	Spondylosis	abdominal_pain	2.11172	0.0445708	17.982	0.419057	0.857107	Men
M47	Spondylosis	tiredness	2.05483	0.722847	5.93038	0.141663	0.565088	Men
M47	Spondylosis	digestive	3.44017	0.336396	18.6292	0.154385	0.576867	Men
M47	Spondylosis	menstrual_disturbances	0	0	Inf	1	1	Men
M47	Spondylosis	chills	9.89963	1.41388	56.3863	0.0105875	0.191071	Men
M47	Spondylosis	endocrin	0	0	22.7709	1	1	Men
M47	Spondylosis	cardiovascular	1.17108	0.124234	5.41363	0.690253	1	Men
M47	Spondylosis	hematological	0	0	22.7709	1	1	Men
M47	Spondylosis	respiratory_problems	1.29591	0.416853	3.71885	0.614057	0.988032	Men
M47	Spondylosis	muscular	1.18809	0.400821	3.3652	0.808308	1	Men
M47	Spondylosis	headache	0.746284	0.0170118	5.27158	1	1	Men
M47	Spondylosis	cognitive	1.19542	0.324188	3.68716	0.779464	1	Men
M47	Spondylosis	renal	2.11172	0.0445708	17.982	0.419057	0.857107	Men
M47	Spondylosis	loss_taste_smell	0.764547	0.137894	2.81103	1	1	Men

## Sheet: Sup Table S5
Table S5. Results of the association between disease trajectories and long COVID in aggregated (Both) and sex-stratified analysis (Women and Men). Each trajectory consists in a first disease and a second disease.
Trajectory first ICD	Description first	Trajectory second ICD	Description second	OR	SE	CI 95% lower	CI 95% upper	p-value	Adjusted p-value	Analysis	Chapter first	Chapter second	Cluster
F17	Nicotine dependence	F41	Other anxiety disorders	1.41567	0.130119	1.16064	1.67069	0.00755381	0.025683	Both	Mental, Behavioral and Neurodevelopmental disorders	Mental, Behavioral and Neurodevelopmental disorders	MHNM
E78	Disorders of lipoprotein metabolism and other lipidemias	I10	Essential (primary) hypertension	1.25675	0.158829	0.945453	1.56805	0.150194	0.22696	Both	Endocrine, nutritional and metabolic diseases	Diseases of the circulatory system	CMD
I10	Essential (primary) hypertension	E66	Overweight and obesity	1.27183	0.156891	0.96433	1.57933	0.125364	0.207921	Both	Diseases of the circulatory system	Endocrine, nutritional and metabolic diseases	CMD
E78	Disorders of lipoprotein metabolism and other lipidemias	E66	Overweight and obesity	1.22691	0.156493	0.920191	1.53363	0.191292	0.270997	Both	Endocrine, nutritional and metabolic diseases	Endocrine, nutritional and metabolic diseases	CMD
F32	Major depressive disorder, single episode	F39	Unspecified mood [affective] disorder	1.48436	0.137747	1.21438	1.75434	0.00413782	0.0165513	Both	Mental, Behavioral and Neurodevelopmental disorders	Mental, Behavioral and Neurodevelopmental disorders	MHNM
I10	Essential (primary) hypertension	E78	Disorders of lipoprotein metabolism and other lipidemias	1.67424	0.149311	1.38159	1.96688	0.000557353	0.00541428	Both	Diseases of the circulatory system	Endocrine, nutritional and metabolic diseases	CMD
F41	Other anxiety disorders	F34	Persistent mood [affective] disorders	1.26341	0.154934	0.959744	1.56707	0.131268	0.20858	Both	Mental, Behavioral and Neurodevelopmental disorders	Mental, Behavioral and Neurodevelopmental disorders	MHNM
E66	Overweight and obesity	E78	Disorders of lipoprotein metabolism and other lipidemias	1.56922	0.158913	1.25775	1.88068	0.00457729	0.017292	Both	Endocrine, nutritional and metabolic diseases	Endocrine, nutritional and metabolic diseases	CMD
E66	Overweight and obesity	I10	Essential (primary) hypertension	1.43027	0.165495	1.10591	1.75464	0.0305875	0.0742839	Both	Endocrine, nutritional and metabolic diseases	Diseases of the circulatory system	CMD
F41	Other anxiety disorders	F32	Major depressive disorder, single episode	1.56521	0.152253	1.2668	1.86362	0.00325485	0.0158093	Both	Mental, Behavioral and Neurodevelopmental disorders	Mental, Behavioral and Neurodevelopmental disorders	MHNM
F17	Nicotine dependence	F18	Inhalant related disorders	1.11415	0.180916	0.75956	1.46874	0.550198	0.653777	Both	Mental, Behavioral and Neurodevelopmental disorders	Mental, Behavioral and Neurodevelopmental disorders	MHNM
F41	Other anxiety disorders	F43	Reaction to severe stress, and adjustment disorders	1.33448	0.170629	1.00005	1.6689	0.0908298	0.15837	Both	Mental, Behavioral and Neurodevelopmental disorders	Mental, Behavioral and Neurodevelopmental disorders	MHNM
F41	Other anxiety disorders	F17	Nicotine dependence	1.04214	0.186401	0.6768	1.40748	0.824754	0.849746	Both	Mental, Behavioral and Neurodevelopmental disorders	Mental, Behavioral and Neurodevelopmental disorders	MHNM
F32	Major depressive disorder, single episode	F41	Other anxiety disorders	1.4029	0.185717	1.03891	1.7669	0.0683172	0.132731	Both	Mental, Behavioral and Neurodevelopmental disorders	Mental, Behavioral and Neurodevelopmental disorders	MHNM
F41	Other anxiety disorders	F51	Sleep disorders not due to a substance or known physiol cond	1.1532	0.202211	0.756879	1.54953	0.480853	0.594509	Both	Mental, Behavioral and Neurodevelopmental disorders	Mental, Behavioral and Neurodevelopmental disorders	MHNM
F17	Nicotine dependence	F32	Major depressive disorder, single episode	1.39926	0.193221	1.02055	1.77797	0.0820965	0.14691	Both	Mental, Behavioral and Neurodevelopmental disorders	Mental, Behavioral and Neurodevelopmental disorders	MHNM
F41	Other anxiety disorders	F39	Unspecified mood [affective] disorder	1.46669	0.196758	1.08105	1.85233	0.0515833	0.109615	Both	Mental, Behavioral and Neurodevelopmental disorders	Mental, Behavioral and Neurodevelopmental disorders	MHNM
E78	Disorders of lipoprotein metabolism and other lipidemias	H91	Other and unspecified hearing loss	1.50097	0.21843	1.07285	1.92908	0.0629964	0.125993	Both	Endocrine, nutritional and metabolic diseases	Diseases of the ear and mastoid process	CMD - MHNM
G43	Migraine	F41	Other anxiety disorders	1.79494	0.188789	1.42492	2.16495	0.00194477	0.0110204	Both	Diseases of the nervous system	Mental, Behavioral and Neurodevelopmental disorders	MHNM
E02	Subclinical iodine-deficiency hypothyroidism	E03	Other hypothyroidism	0.958569	0.228072	0.511556	1.40558	0.852815	0.865544	Both	Endocrine, nutritional and metabolic diseases	Endocrine, nutritional and metabolic diseases	CMD
F41	Other anxiety disorders	G56	Mononeuropathies of upper limb	1.8238	0.193197	1.44514	2.20246	0.00186829	0.0110204	Both	Mental, Behavioral and Neurodevelopmental disorders	Diseases of the nervous system	MHNM
E78	Disorders of lipoprotein metabolism and other lipidemias	K21	Gastro-esophageal reflux disease	1.98506	0.20603	1.58125	2.38887	0.000874988	0.00594992	Both	Endocrine, nutritional and metabolic diseases	Diseases of the digestive system	CMD
F41	Other anxiety disorders	M51	Thoracic, thoracolum, and lumbosacral intvrt disc disorders	2.27546	0.186734	1.90946	2.64145	1.06787e-05	0.000726155	Both	Mental, Behavioral and Neurodevelopmental disorders	Diseases of the musculoskeletal system and connective tissue	MHNM
E78	Disorders of lipoprotein metabolism and other lipidemias	K76	Other diseases of liver	1.64352	0.219963	1.2124	2.07464	0.0239001	0.0650082	Both	Endocrine, nutritional and metabolic diseases	Diseases of the digestive system	CMD
F41	Other anxiety disorders	K21	Gastro-esophageal reflux disease	2.07921	0.19679	1.69351	2.46491	0.000199496	0.00389114	Both	Mental, Behavioral and Neurodevelopmental disorders	Diseases of the digestive system	MHNM - CMD
F32	Major depressive disorder, single episode	E66	Overweight and obesity	1.38504	0.223387	0.947211	1.82287	0.144801	0.223784	Both	Mental, Behavioral and Neurodevelopmental disorders	Endocrine, nutritional and metabolic diseases	MHNM - CMD
F41	Other anxiety disorders	G43	Migraine	2.20383	0.18974	1.83194	2.57571	3.11873e-05	0.00106037	Both	Mental, Behavioral and Neurodevelopmental disorders	Diseases of the nervous system	MHNM
E66	Overweight and obesity	K76	Other diseases of liver	1.2157	0.245277	0.734965	1.69643	0.425845	0.536249	Both	Endocrine, nutritional and metabolic diseases	Diseases of the digestive system	CMD
F32	Major depressive disorder, single episode	F34	Persistent mood [affective] disorders	1.5153	0.221362	1.08143	1.94916	0.0604473	0.124558	Both	Mental, Behavioral and Neurodevelopmental disorders	Mental, Behavioral and Neurodevelopmental disorders	MHNM
F17	Nicotine dependence	F34	Persistent mood [affective] disorders	1.10762	0.245202	0.627032	1.58821	0.676788	0.742283	Both	Mental, Behavioral and Neurodevelopmental disorders	Mental, Behavioral and Neurodevelopmental disorders	MHNM
I10	Essential (primary) hypertension	E11	Type 2 diabetes mellitus	1.29669	0.265185	0.776934	1.81644	0.327214	0.419822	Both	Diseases of the circulatory system	Endocrine, nutritional and metabolic diseases	CMD
E66	Overweight and obesity	G47	Sleep disorders	1.42607	0.252616	0.930956	1.92119	0.160021	0.23152	Both	Endocrine, nutritional and metabolic diseases	Diseases of the nervous system	CMD - MHNM
E66	Overweight and obesity	F32	Major depressive disorder, single episode	1.79498	0.217657	1.36838	2.22158	0.00719469	0.025683	Both	Endocrine, nutritional and metabolic diseases	Mental, Behavioral and Neurodevelopmental disorders	CMD - MHNM
E78	Disorders of lipoprotein metabolism and other lipidemias	E11	Type 2 diabetes mellitus	1.57613	0.261353	1.06389	2.08837	0.0817124	0.14691	Both	Endocrine, nutritional and metabolic diseases	Endocrine, nutritional and metabolic diseases	CMD
E78	Disorders of lipoprotein metabolism and other lipidemias	G47	Sleep disorders	1.74005	0.255921	1.23846	2.24165	0.0304334	0.0742839	Both	Endocrine, nutritional and metabolic diseases	Diseases of the nervous system	CMD - MHNM
E66	Overweight and obesity	H60	Otitis externa	1.65003	0.236068	1.18735	2.11272	0.033888	0.076233	Both	Endocrine, nutritional and metabolic diseases	Diseases of the ear and mastoid process	CMD - MHNM
E78	Disorders of lipoprotein metabolism and other lipidemias	M17	Osteoarthritis of knee	1.32129	0.267978	0.79606	1.84651	0.298497	0.390342	Both	Endocrine, nutritional and metabolic diseases	Diseases of the musculoskeletal system and connective tissue	CMD - MHNM
E78	Disorders of lipoprotein metabolism and other lipidemias	M19	Other and unspecified osteoarthritis	1.36754	0.261789	0.854446	1.88064	0.231822	0.315277	Both	Endocrine, nutritional and metabolic diseases	Diseases of the musculoskeletal system and connective tissue	CMD - MHNM
E78	Disorders of lipoprotein metabolism and other lipidemias	E55	Vitamin D deficiency	1.95902	0.231021	1.50622	2.41181	0.0036057	0.0163458	Both	Endocrine, nutritional and metabolic diseases	Endocrine, nutritional and metabolic diseases	CMD
E66	Overweight and obesity	G56	Mononeuropathies of upper limb	2.15312	0.221247	1.71948	2.58675	0.000527589	0.00541428	Both	Endocrine, nutritional and metabolic diseases	Diseases of the nervous system	CMD - MHNM
J45	Asthma	J30	Vasomotor and allergic rhinitis	2.12242	0.224646	1.68212	2.56272	0.000808196	0.00594992	Both	Diseases of the respiratory system	Diseases of the respiratory system	RESP
F43	Reaction to severe stress, and adjustment disorders	F41	Other anxiety disorders	1.92239	0.226925	1.47762	2.36715	0.00397543	0.0165513	Both	Mental, Behavioral and Neurodevelopmental disorders	Mental, Behavioral and Neurodevelopmental disorders	MHNM
E66	Overweight and obesity	E11	Type 2 diabetes mellitus	1.18044	0.289952	0.612141	1.74873	0.567248	0.653777	Both	Endocrine, nutritional and metabolic diseases	Endocrine, nutritional and metabolic diseases	CMD
E66	Overweight and obesity	K21	Gastro-esophageal reflux disease	2.23173	0.23211	1.77681	2.68666	0.000542962	0.00541428	Both	Endocrine, nutritional and metabolic diseases	Diseases of the digestive system	CMD
I10	Essential (primary) hypertension	K21	Gastro-esophageal reflux disease	1.87346	0.252666	1.37825	2.36868	0.0129675	0.0419901	Both	Diseases of the circulatory system	Diseases of the digestive system	CMD
J30	Vasomotor and allergic rhinitis	J45	Asthma	2.29764	0.225761	1.85515	2.74012	0.00022889	0.00389114	Both	Diseases of the respiratory system	Diseases of the respiratory system	RESP
F17	Nicotine dependence	K76	Other diseases of liver	1.74175	0.251895	1.24805	2.23546	0.0276043	0.0721958	Both	Mental, Behavioral and Neurodevelopmental disorders	Diseases of the digestive system	MHNM - CMD
E66	Overweight and obesity	M17	Osteoarthritis of knee	1.54175	0.263651	1.025	2.0585	0.100587	0.170999	Both	Endocrine, nutritional and metabolic diseases	Diseases of the musculoskeletal system and connective tissue	CMD - MHNM
I10	Essential (primary) hypertension	K76	Other diseases of liver	1.7454	0.263822	1.22832	2.26248	0.0347533	0.076233	Both	Diseases of the circulatory system	Diseases of the digestive system	CMD
F41	Other anxiety disorders	G44	Other headache syndromes	1.16998	0.268073	0.644569	1.6954	0.55813	0.653777	Both	Mental, Behavioral and Neurodevelopmental disorders	Diseases of the nervous system	MHNM
F32	Major depressive disorder, single episode	F43	Reaction to severe stress, and adjustment disorders	2.01363	0.23305	1.55686	2.4704	0.00266985	0.0139653	Both	Mental, Behavioral and Neurodevelopmental disorders	Mental, Behavioral and Neurodevelopmental disorders	MHNM
F17	Nicotine dependence	G47	Sleep disorders	1.01777	0.323209	0.38429	1.65125	0.956545	0.956545	Both	Mental, Behavioral and Neurodevelopmental disorders	Diseases of the nervous system	MHNM
I10	Essential (primary) hypertension	G47	Sleep disorders	1.9172	0.272054	1.38398	2.45041	0.0167379	0.0494858	Both	Diseases of the circulatory system	Diseases of the nervous system	CMD - MHNM
E03	Other hypothyroidism	E66	Overweight and obesity	1.16274	0.276044	0.621703	1.70378	0.58492	0.662909	Both	Endocrine, nutritional and metabolic diseases	Endocrine, nutritional and metabolic diseases	CMD
F51	Sleep disorders not due to a substance or known physiol cond	F41	Other anxiety disorders	1.14489	0.291643	0.57328	1.7165	0.642684	0.716434	Both	Mental, Behavioral and Neurodevelopmental disorders	Mental, Behavioral and Neurodevelopmental disorders	MHNM
J45	Asthma	E66	Overweight and obesity	1.80222	0.255098	1.30224	2.3022	0.020944	0.0593412	Both	Diseases of the respiratory system	Endocrine, nutritional and metabolic diseases	RESP - CMD
F32	Major depressive disorder, single episode	F51	Sleep disorders not due to a substance or known physiol cond	1.46951	0.27233	0.935754	2.00327	0.157518	0.23152	Both	Mental, Behavioral and Neurodevelopmental disorders	Mental, Behavioral and Neurodevelopmental disorders	MHNM
E78	Disorders of lipoprotein metabolism and other lipidemias	K57	Diverticular disease of intestine	1.12513	0.326515	0.485177	1.76509	0.718029	0.762906	Both	Endocrine, nutritional and metabolic diseases	Diseases of the digestive system	CMD
E66	Overweight and obesity	F34	Persistent mood [affective] disorders	1.63333	0.273266	1.09774	2.16892	0.0725911	0.137117	Both	Endocrine, nutritional and metabolic diseases	Mental, Behavioral and Neurodevelopmental disorders	CMD - MHNM
H60	Otitis externa	E66	Overweight and obesity	1.76732	0.267743	1.24256	2.29209	0.0334276	0.076233	Both	Diseases of the ear and mastoid process	Endocrine, nutritional and metabolic diseases	MHNM - CMD
M13	Other arthritis	M12	Other and unspecified arthropathy	1.07479	0.313701	0.459948	1.68964	0.818152	0.849746	Both	Diseases of the musculoskeletal system and connective tissue	Diseases of the musculoskeletal system and connective tissue	MHNM
E11	Type 2 diabetes mellitus	E66	Overweight and obesity	0.772178	0.39794	-0.00777065	1.55213	0.515889	0.626437	Both	Endocrine, nutritional and metabolic diseases	Endocrine, nutritional and metabolic diseases	CMD
G56	Mononeuropathies of upper limb	F41	Other anxiety disorders	1.40824	0.279901	0.859641	1.95683	0.221304	0.307116	Both	Diseases of the nervous system	Mental, Behavioral and Neurodevelopmental disorders	MHNM
F17	Nicotine dependence	M12	Other and unspecified arthropathy	0.878617	0.339267	0.213665	1.54357	0.702885	0.75867	Both	Mental, Behavioral and Neurodevelopmental disorders	Diseases of the musculoskeletal system and connective tissue	MHNM
E66	Overweight and obesity	E03	Other hypothyroidism	1.51081	0.273881	0.974015	2.04761	0.131896	0.20858	Both	Endocrine, nutritional and metabolic diseases	Endocrine, nutritional and metabolic diseases	CMD
E78	Disorders of lipoprotein metabolism and other lipidemias	M47	Spondylosis	2.42358	0.260904	1.91222	2.93494	0.000691315	0.00587618	Both	Endocrine, nutritional and metabolic diseases	Diseases of the musculoskeletal system and connective tissue	CMD - MHNM
H91	Other and unspecified hearing loss	E78	Disorders of lipoprotein metabolism and other lipidemias	1.43161	0.30544	0.832956	2.03026	0.240118	0.320157	Both	Diseases of the ear and mastoid process	Endocrine, nutritional and metabolic diseases	MHNM - CMD
E66	Overweight and obesity	F39	Unspecified mood [affective] disorder	1.90663	0.264649	1.38793	2.42533	0.0147497	0.0455901	Both	Endocrine, nutritional and metabolic diseases	Mental, Behavioral and Neurodevelopmental disorders	CMD - MHNM
F17	Nicotine dependence	F41	Other anxiety disorders	1.25851	0.153797	0.957071	1.55995	0.134914	0.241325	Women	Mental, Behavioral and Neurodevelopmental disorders	Mental, Behavioral and Neurodevelopmental disorders	MHNM
F32	Major depressive disorder, single episode	F39	Unspecified mood [affective] disorder	1.49254	0.15195	1.19472	1.79036	0.0083989	0.032323	Women	Mental, Behavioral and Neurodevelopmental disorders	Mental, Behavioral and Neurodevelopmental disorders	MHNM
F41	Other anxiety disorders	E66	Overweight and obesity	1.33916	0.164127	1.01747	1.66084	0.0751817	0.154001	Women	Mental, Behavioral and Neurodevelopmental disorders	Endocrine, nutritional and metabolic diseases	MHNM - CMD
F41	Other anxiety disorders	F34	Persistent mood [affective] disorders	1.28771	0.170285	0.953957	1.62146	0.137556	0.242634	Women	Mental, Behavioral and Neurodevelopmental disorders	Mental, Behavioral and Neurodevelopmental disorders	MHNM
F41	Other anxiety disorders	N92	Excessive, frequent and irregular menstruation	1.78738	0.15842	1.47689	2.09788	0.000246451	0.00411377	Women	Mental, Behavioral and Neurodevelopmental disorders	Diseases of the genitourinary system	MHNM
F41	Other anxiety disorders	F32	Major depressive disorder, single episode	1.64825	0.167306	1.32034	1.97616	0.00281894	0.0179002	Women	Mental, Behavioral and Neurodevelopmental disorders	Mental, Behavioral and Neurodevelopmental disorders	MHNM
F41	Other anxiety disorders	F43	Reaction to severe stress, and adjustment disorders	1.44433	0.182324	1.08698	1.80168	0.0437531	0.115763	Women	Mental, Behavioral and Neurodevelopmental disorders	Mental, Behavioral and Neurodevelopmental disorders	MHNM
F41	Other anxiety disorders	F17	Nicotine dependence	1.1608	0.198641	0.771474	1.55013	0.452857	0.547741	Women	Mental, Behavioral and Neurodevelopmental disorders	Mental, Behavioral and Neurodevelopmental disorders	MHNM
E78	Disorders of lipoprotein metabolism and other lipidemias	E66	Overweight and obesity	1.25127	0.203017	0.853368	1.64918	0.269526	0.376152	Women	Endocrine, nutritional and metabolic diseases	Endocrine, nutritional and metabolic diseases	CMD
E66	Overweight and obesity	F41	Other anxiety disorders	1.90095	0.180664	1.54686	2.25505	0.000377223	0.00411377	Women	Endocrine, nutritional and metabolic diseases	Mental, Behavioral and Neurodevelopmental disorders	CMD - MHNM
E78	Disorders of lipoprotein metabolism and other lipidemias	N95	Menopausal and other perimenopausal disorders	0.993446	0.225302	0.551862	1.43503	0.976717	0.976717	Women	Endocrine, nutritional and metabolic diseases	Diseases of the genitourinary system	CMD - MHNM
I10	Essential (primary) hypertension	E66	Overweight and obesity	1.35844	0.207346	0.952052	1.76483	0.139561	0.242797	Women	Diseases of the circulatory system	Endocrine, nutritional and metabolic diseases	CMD
F32	Major depressive disorder, single episode	F41	Other anxiety disorders	1.52622	0.197293	1.13954	1.91291	0.0321146	0.0890627	Women	Mental, Behavioral and Neurodevelopmental disorders	Mental, Behavioral and Neurodevelopmental disorders	MHNM
I10	Essential (primary) hypertension	E78	Disorders of lipoprotein metabolism and other lipidemias	1.73418	0.200806	1.34061	2.12776	0.00611356	0.0250459	Women	Diseases of the circulatory system	Endocrine, nutritional and metabolic diseases	CMD
E66	Overweight and obesity	E78	Disorders of lipoprotein metabolism and other lipidemias	1.46653	0.202266	1.07009	1.86296	0.0583536	0.137239	Women	Endocrine, nutritional and metabolic diseases	Endocrine, nutritional and metabolic diseases	CMD
F17	Nicotine dependence	F18	Inhalant related disorders	1.18084	0.215625	0.758222	1.60346	0.440765	0.541851	Women	Mental, Behavioral and Neurodevelopmental disorders	Mental, Behavioral and Neurodevelopmental disorders	MHNM
N92	Excessive, frequent and irregular menstruation	N95	Menopausal and other perimenopausal disorders	1.3557	0.210531	0.943071	1.76834	0.14832	0.245387	Women	Diseases of the genitourinary system	Diseases of the genitourinary system	MHNM
F41	Other anxiety disorders	F51	Sleep disorders not due to a substance or known physiol cond	1.13277	0.22301	0.695682	1.56986	0.576143	0.671286	Women	Mental, Behavioral and Neurodevelopmental disorders	Mental, Behavioral and Neurodevelopmental disorders	MHNM
E66	Overweight and obesity	I10	Essential (primary) hypertension	1.38466	0.214512	0.964219	1.80509	0.129224	0.234449	Women	Endocrine, nutritional and metabolic diseases	Diseases of the circulatory system	CMD
E78	Disorders of lipoprotein metabolism and other lipidemias	I10	Essential (primary) hypertension	1.21775	0.229355	0.768225	1.66728	0.390362	0.498417	Women	Endocrine, nutritional and metabolic diseases	Diseases of the circulatory system	CMD
E02	Subclinical iodine-deficiency hypothyroidism	E03	Other hypothyroidism	0.958203	0.239734	0.488334	1.42807	0.858649	0.901226	Women	Endocrine, nutritional and metabolic diseases	Endocrine, nutritional and metabolic diseases	CMD
F17	Nicotine dependence	F32	Major depressive disorder, single episode	1.5021	0.20945	1.09159	1.91261	0.0520722	0.125235	Women	Mental, Behavioral and Neurodevelopmental disorders	Mental, Behavioral and Neurodevelopmental disorders	MHNM
G43	Migraine	F41	Other anxiety disorders	1.85819	0.199308	1.46755	2.24882	0.00187871	0.0149122	Women	Diseases of the nervous system	Mental, Behavioral and Neurodevelopmental disorders	MHNM
F41	Other anxiety disorders	F39	Unspecified mood [affective] disorder	1.49594	0.216345	1.07191	1.91997	0.062655	0.143676	Women	Mental, Behavioral and Neurodevelopmental disorders	Mental, Behavioral and Neurodevelopmental disorders	MHNM
F41	Other anxiety disorders	G56	Mononeuropathies of upper limb	1.86663	0.207543	1.45985	2.2734	0.00263627	0.0176214	Women	Mental, Behavioral and Neurodevelopmental disorders	Diseases of the nervous system	MHNM
F41	Other anxiety disorders	G43	Migraine	2.26129	0.197098	1.87498	2.6476	3.47697e-05	0.00220788	Women	Mental, Behavioral and Neurodevelopmental disorders	Diseases of the nervous system	MHNM
F32	Major depressive disorder, single episode	E78	Disorders of lipoprotein metabolism and other lipidemias	1.36651	0.230789	0.914168	1.81885	0.176056	0.266181	Women	Mental, Behavioral and Neurodevelopmental disorders	Endocrine, nutritional and metabolic diseases	MHNM - CMD
N95	Menopausal and other perimenopausal disorders	E78	Disorders of lipoprotein metabolism and other lipidemias	0.586639	0.335724	-0.0713677	1.24465	0.112141	0.20944	Women	Diseases of the genitourinary system	Endocrine, nutritional and metabolic diseases	MHNM - CMD
E78	Disorders of lipoprotein metabolism and other lipidemias	E03	Other hypothyroidism	1.21649	0.255858	0.715016	1.71796	0.443721	0.541851	Women	Endocrine, nutritional and metabolic diseases	Endocrine, nutritional and metabolic diseases	CMD
F41	Other anxiety disorders	M51	Thoracic, thoracolum, and lumbosacral intvrt disc disorders	2.26357	0.215706	1.8408	2.68635	0.000152288	0.00322344	Women	Mental, Behavioral and Neurodevelopmental disorders	Diseases of the musculoskeletal system and connective tissue	MHNM
F17	Nicotine dependence	G43	Migraine	1.95648	0.220336	1.52463	2.38833	0.00231893	0.0163614	Women	Mental, Behavioral and Neurodevelopmental disorders	Diseases of the nervous system	MHNM
F32	Major depressive disorder, single episode	F34	Persistent mood [affective] disorders	1.71072	0.235845	1.24847	2.17296	0.0228135	0.0724328	Women	Mental, Behavioral and Neurodevelopmental disorders	Mental, Behavioral and Neurodevelopmental disorders	MHNM
N92	Excessive, frequent and irregular menstruation	F41	Other anxiety disorders	1.85418	0.226408	1.41043	2.29793	0.00638872	0.0253552	Women	Diseases of the genitourinary system	Mental, Behavioral and Neurodevelopmental disorders	MHNM
E78	Disorders of lipoprotein metabolism and other lipidemias	F32	Major depressive disorder, single episode	1.60709	0.244428	1.12802	2.08616	0.0522634	0.125235	Women	Endocrine, nutritional and metabolic diseases	Mental, Behavioral and Neurodevelopmental disorders	CMD - MHNM
F32	Major depressive disorder, single episode	E66	Overweight and obesity	1.2832	0.256998	0.779493	1.78691	0.331913	0.453258	Women	Mental, Behavioral and Neurodevelopmental disorders	Endocrine, nutritional and metabolic diseases	MHNM - CMD
F41	Other anxiety disorders	K21	Gastro-esophageal reflux disease	2.44495	0.221155	2.01149	2.8784	5.28784e-05	0.00223852	Women	Mental, Behavioral and Neurodevelopmental disorders	Diseases of the digestive system	MHNM - CMD
E66	Overweight and obesity	F32	Major depressive disorder, single episode	1.91627	0.234869	1.45594	2.37661	0.0056207	0.0246148	Women	Endocrine, nutritional and metabolic diseases	Mental, Behavioral and Neurodevelopmental disorders	CMD - MHNM
F17	Nicotine dependence	F34	Persistent mood [affective] disorders	1.09975	0.276557	0.557706	1.64179	0.730994	0.800313	Women	Mental, Behavioral and Neurodevelopmental disorders	Mental, Behavioral and Neurodevelopmental disorders	MHNM
G43	Migraine	N92	Excessive, frequent and irregular menstruation	1.42958	0.255021	0.929751	1.92941	0.161099	0.249506	Women	Diseases of the nervous system	Diseases of the genitourinary system	MHNM
E78	Disorders of lipoprotein metabolism and other lipidemias	F51	Sleep disorders not due to a substance or known physiol cond	0.970604	0.302742	0.377241	1.56397	0.921493	0.94627	Women	Endocrine, nutritional and metabolic diseases	Mental, Behavioral and Neurodevelopmental disorders	CMD - MHNM
I10	Essential (primary) hypertension	N95	Menopausal and other perimenopausal disorders	0.735389	0.338531	0.0718811	1.3989	0.363925	0.481443	Women	Diseases of the circulatory system	Diseases of the genitourinary system	CMD - MHNM
E03	Other hypothyroidism	E78	Disorders of lipoprotein metabolism and other lipidemias	1.80362	0.252839	1.30806	2.29917	0.0196644	0.0664111	Women	Endocrine, nutritional and metabolic diseases	Endocrine, nutritional and metabolic diseases	CMD
E03	Other hypothyroidism	E66	Overweight and obesity	1.26976	0.279269	0.722397	1.81711	0.392454	0.498417	Women	Endocrine, nutritional and metabolic diseases	Endocrine, nutritional and metabolic diseases	CMD
F32	Major depressive disorder, single episode	N92	Excessive, frequent and irregular menstruation	1.27858	0.273126	0.743266	1.8139	0.368238	0.482127	Women	Mental, Behavioral and Neurodevelopmental disorders	Diseases of the genitourinary system	MHNM
F41	Other anxiety disorders	K76	Other diseases of liver	2.0519	0.246473	1.56883	2.53498	0.00354304	0.0195637	Women	Mental, Behavioral and Neurodevelopmental disorders	Diseases of the digestive system	MHNM - CMD
F41	Other anxiety disorders	G44	Other headache syndromes	1.06508	0.294873	0.487144	1.64303	0.830675	0.886518	Women	Mental, Behavioral and Neurodevelopmental disorders	Diseases of the nervous system	MHNM
E78	Disorders of lipoprotein metabolism and other lipidemias	E55	Vitamin D deficiency	2.30048	0.248967	1.81251	2.78844	0.000818999	0.00800099	Women	Endocrine, nutritional and metabolic diseases	Endocrine, nutritional and metabolic diseases	CMD
F17	Nicotine dependence	F39	Unspecified mood [affective] disorder	1.81134	0.254128	1.31326	2.30942	0.0194045	0.0664111	Women	Mental, Behavioral and Neurodevelopmental disorders	Mental, Behavioral and Neurodevelopmental disorders	MHNM
E78	Disorders of lipoprotein metabolism and other lipidemias	F34	Persistent mood [affective] disorders	1.28698	0.288292	0.721935	1.85202	0.381498	0.49439	Women	Endocrine, nutritional and metabolic diseases	Mental, Behavioral and Neurodevelopmental disorders	CMD - MHNM
E66	Overweight and obesity	G56	Mononeuropathies of upper limb	2.02832	0.251106	1.53616	2.52048	0.00485699	0.0228459	Women	Endocrine, nutritional and metabolic diseases	Diseases of the nervous system	CMD - MHNM
E78	Disorders of lipoprotein metabolism and other lipidemias	M20	Acquired deformities of fingers and toes	0.925558	0.327425	0.283817	1.5673	0.813229	0.875255	Women	Endocrine, nutritional and metabolic diseases	Diseases of the musculoskeletal system and connective tissue	CMD - MHNM
F32	Major depressive disorder, single episode	F43	Reaction to severe stress, and adjustment disorders	1.95335	0.256124	1.45136	2.45535	0.00894503	0.0334123	Women	Mental, Behavioral and Neurodevelopmental disorders	Mental, Behavioral and Neurodevelopmental disorders	MHNM
E78	Disorders of lipoprotein metabolism and other lipidemias	K21	Gastro-esophageal reflux disease	2.22364	0.259071	1.71587	2.73141	0.00203781	0.0152236	Women	Endocrine, nutritional and metabolic diseases	Diseases of the digestive system	CMD
F43	Reaction to severe stress, and adjustment disorders	F41	Other anxiety disorders	2.08138	0.25295	1.58561	2.57715	0.00375635	0.0198774	Women	Mental, Behavioral and Neurodevelopmental disorders	Mental, Behavioral and Neurodevelopmental disorders	MHNM
I10	Essential (primary) hypertension	F32	Major depressive disorder, single episode	1.50844	0.283352	0.953082	2.0638	0.146845	0.245387	Women	Diseases of the circulatory system	Mental, Behavioral and Neurodevelopmental disorders	CMD - MHNM
E78	Disorders of lipoprotein metabolism and other lipidemias	G56	Mononeuropathies of upper limb	1.25956	0.29761	0.676254	1.84286	0.438114	0.541851	Women	Endocrine, nutritional and metabolic diseases	Diseases of the nervous system	CMD - MHNM
G56	Mononeuropathies of upper limb	E78	Disorders of lipoprotein metabolism and other lipidemias	1.67537	0.277931	1.13064	2.22011	0.0633531	0.143676	Women	Diseases of the nervous system	Endocrine, nutritional and metabolic diseases	MHNM - CMD
E78	Disorders of lipoprotein metabolism and other lipidemias	M51	Thoracic, thoracolum, and lumbosacral intvrt disc disorders	2.08687	0.263255	1.5709	2.60284	0.00519811	0.0235771	Women	Endocrine, nutritional and metabolic diseases	Diseases of the musculoskeletal system and connective tissue	CMD - MHNM
E78	Disorders of lipoprotein metabolism and other lipidemias	M19	Other and unspecified osteoarthritis	1.51631	0.292664	0.942697	2.08992	0.154917	0.246268	Women	Endocrine, nutritional and metabolic diseases	Diseases of the musculoskeletal system and connective tissue	CMD - MHNM
E66	Overweight and obesity	K76	Other diseases of liver	1.03069	0.316498	0.410362	1.65101	0.923917	0.94627	Women	Endocrine, nutritional and metabolic diseases	Diseases of the digestive system	CMD
E78	Disorders of lipoprotein metabolism and other lipidemias	M81	Osteoporosis without current pathological fracture	1.12145	0.332727	0.469314	1.77358	0.73048	0.800313	Women	Endocrine, nutritional and metabolic diseases	Diseases of the musculoskeletal system and connective tissue	CMD - MHNM
E66	Overweight and obesity	H60	Otitis externa	1.63569	0.278625	1.08959	2.18178	0.0773892	0.156007	Women	Endocrine, nutritional and metabolic diseases	Diseases of the ear and mastoid process	CMD - MHNM
E78	Disorders of lipoprotein metabolism and other lipidemias	M17	Osteoarthritis of knee	1.54975	0.30342	0.955062	2.14445	0.148778	0.245387	Women	Endocrine, nutritional and metabolic diseases	Diseases of the musculoskeletal system and connective tissue	CMD - MHNM
F32	Major depressive disorder, single episode	I10	Essential (primary) hypertension	1.68868	0.286789	1.12658	2.25077	0.0677081	0.144618	Women	Mental, Behavioral and Neurodevelopmental disorders	Diseases of the circulatory system	MHNM - CMD
G56	Mononeuropathies of upper limb	F41	Other anxiety disorders	1.25689	0.309093	0.65108	1.8627	0.459472	0.550499	Women	Diseases of the nervous system	Mental, Behavioral and Neurodevelopmental disorders	MHNM
F41	Other anxiety disorders	M47	Spondylosis	1.83601	0.281203	1.28487	2.38716	0.0307182	0.0890627	Women	Mental, Behavioral and Neurodevelopmental disorders	Diseases of the musculoskeletal system and connective tissue	MHNM
E66	Overweight and obesity	E03	Other hypothyroidism	1.62636	0.286789	1.06426	2.18845	0.0899205	0.170446	Women	Endocrine, nutritional and metabolic diseases	Endocrine, nutritional and metabolic diseases	CMD
F41	Other anxiety disorders	R32	Unspecified urinary incontinence	1.67535	0.28701	1.11282	2.23788	0.0721885	0.150294	Women	Mental, Behavioral and Neurodevelopmental disorders	Symptoms, signs and abnormal clinical and laboratory findings, not elsewhere classified	MHNM
F32	Major depressive disorder, single episode	F51	Sleep disorders not due to a substance or known physiol cond	1.16176	0.319736	0.535086	1.78843	0.639122	0.724718	Women	Mental, Behavioral and Neurodevelopmental disorders	Mental, Behavioral and Neurodevelopmental disorders	MHNM
E78	Disorders of lipoprotein metabolism and other lipidemias	K76	Other diseases of liver	1.77661	0.288151	1.21184	2.34137	0.0461018	0.118694	Women	Endocrine, nutritional and metabolic diseases	Diseases of the digestive system	CMD
F41	Other anxiety disorders	N91	Absent, scanty and rare menstruation	2.29735	0.264774	1.77841	2.8163	0.0016815	0.0142367	Women	Mental, Behavioral and Neurodevelopmental disorders	Diseases of the genitourinary system	MHNM
J45	Asthma	J30	Vasomotor and allergic rhinitis	3.13898	0.254398	2.64036	3.63759	6.90855e-06	0.000877386	Women	Diseases of the respiratory system	Diseases of the respiratory system	RESP
N95	Menopausal and other perimenopausal disorders	I10	Essential (primary) hypertension	0.945445	0.361617	0.236689	1.6542	0.876714	0.912645	Women	Diseases of the genitourinary system	Diseases of the circulatory system	MHNM - CMD
F51	Sleep disorders not due to a substance or known physiol cond	F41	Other anxiety disorders	0.693032	0.402008	-0.0948898	1.48095	0.361707	0.481443	Women	Mental, Behavioral and Neurodevelopmental disorders	Mental, Behavioral and Neurodevelopmental disorders	MHNM
E66	Overweight and obesity	M17	Osteoarthritis of knee	1.9703	0.29122	1.39952	2.54108	0.019871	0.0664111	Women	Endocrine, nutritional and metabolic diseases	Diseases of the musculoskeletal system and connective tissue	CMD - MHNM
M18	Osteoarthritis of first carpometacarpal joint	M19	Other and unspecified osteoarthritis	0.514036	0.468093	-0.403408	1.43148	0.155129	0.246268	Women	Diseases of the musculoskeletal system and connective tissue	Diseases of the musculoskeletal system and connective tissue	MHNM
F34	Persistent mood [affective] disorders	E66	Overweight and obesity	1.72419	0.297557	1.14099	2.30739	0.067136	0.144618	Women	Mental, Behavioral and Neurodevelopmental disorders	Endocrine, nutritional and metabolic diseases	MHNM - CMD
E66	Overweight and obesity	F39	Unspecified mood [affective] disorder	2.22449	0.280759	1.67421	2.77477	0.00440308	0.0223677	Women	Endocrine, nutritional and metabolic diseases	Mental, Behavioral and Neurodevelopmental disorders	CMD - MHNM
F43	Reaction to severe stress, and adjustment disorders	E66	Overweight and obesity	1.28847	0.323177	0.655057	1.92189	0.432883	0.541851	Women	Mental, Behavioral and Neurodevelopmental disorders	Endocrine, nutritional and metabolic diseases	MHNM - CMD
E66	Overweight and obesity	F43	Reaction to severe stress, and adjustment disorders	2.3091	0.28232	1.75577	2.86244	0.00303449	0.0182929	Women	Endocrine, nutritional and metabolic diseases	Mental, Behavioral and Neurodevelopmental disorders	CMD - MHNM
F32	Major depressive disorder, single episode	G56	Mononeuropathies of upper limb	2.71706	0.274245	2.17955	3.25457	0.000267656	0.00411377	Women	Mental, Behavioral and Neurodevelopmental disorders	Diseases of the nervous system	MHNM
F34	Persistent mood [affective] disorders	F41	Other anxiety disorders	2.20649	0.288128	1.64177	2.77121	0.00601958	0.0250459	Women	Mental, Behavioral and Neurodevelopmental disorders	Mental, Behavioral and Neurodevelopmental disorders	MHNM
F34	Persistent mood [affective] disorders	E78	Disorders of lipoprotein metabolism and other lipidemias	1.75119	0.307372	1.14876	2.35363	0.0683234	0.144618	Women	Mental, Behavioral and Neurodevelopmental disorders	Endocrine, nutritional and metabolic diseases	MHNM - CMD
F32	Major depressive disorder, single episode	F17	Nicotine dependence	1.6889	0.306995	1.08721	2.2906	0.0877978	0.168944	Women	Mental, Behavioral and Neurodevelopmental disorders	Mental, Behavioral and Neurodevelopmental disorders	MHNM
M13	Other arthritis	M12	Other and unspecified arthropathy	1.15192	0.348643	0.468595	1.83525	0.68499	0.763103	Women	Diseases of the musculoskeletal system and connective tissue	Diseases of the musculoskeletal system and connective tissue	MHNM
J30	Vasomotor and allergic rhinitis	J45	Asthma	2.67106	0.275196	2.13169	3.21044	0.000356851	0.00411377	Women	Diseases of the respiratory system	Diseases of the respiratory system	RESP
E66	Overweight and obesity	K21	Gastro-esophageal reflux disease	2.88403	0.275914	2.34325	3.42481	0.000123621	0.00313997	Women	Endocrine, nutritional and metabolic diseases	Diseases of the digestive system	CMD
G56	Mononeuropathies of upper limb	E66	Overweight and obesity	1.01626	0.363916	0.303002	1.72953	0.96464	0.972296	Women	Diseases of the nervous system	Endocrine, nutritional and metabolic diseases	MHNM - CMD
E66	Overweight and obesity	M19	Other and unspecified osteoarthritis	1.3672	0.337274	0.706154	2.02824	0.353756	0.477946	Women	Endocrine, nutritional and metabolic diseases	Diseases of the musculoskeletal system and connective tissue	CMD - MHNM
E66	Overweight and obesity	F34	Persistent mood [affective] disorders	1.46448	0.325856	0.825811	2.10314	0.241697	0.341061	Women	Endocrine, nutritional and metabolic diseases	Mental, Behavioral and Neurodevelopmental disorders	CMD - MHNM
J45	Asthma	E66	Overweight and obesity	1.8628	0.3013	1.27226	2.45334	0.0389555	0.105263	Women	Diseases of the respiratory system	Endocrine, nutritional and metabolic diseases	RESP - CMD
I10	Essential (primary) hypertension	F39	Unspecified mood [affective] disorder	1.95737	0.31046	1.34888	2.56586	0.0305221	0.0890627	Women	Diseases of the circulatory system	Mental, Behavioral and Neurodevelopmental disorders	CMD - MHNM
G43	Migraine	F32	Major depressive disorder, single episode	1.26543	0.33723	0.604468	1.92639	0.485134	0.575814	Women	Diseases of the nervous system	Mental, Behavioral and Neurodevelopmental disorders	MHNM
G43	Migraine	F51	Sleep disorders not due to a substance or known physiol cond	1.47192	0.326453	0.832086	2.11176	0.236354	0.339274	Women	Diseases of the nervous system	Mental, Behavioral and Neurodevelopmental disorders	MHNM
N95	Menopausal and other perimenopausal disorders	M20	Acquired deformities of fingers and toes	0.569706	0.470135	-0.351742	1.49115	0.231404	0.337797	Women	Diseases of the genitourinary system	Diseases of the musculoskeletal system and connective tissue	MHNM
G56	Mononeuropathies of upper limb	N95	Menopausal and other perimenopausal disorders	0.814531	0.405487	0.0197905	1.60927	0.612915	0.707638	Women	Diseases of the nervous system	Diseases of the genitourinary system	MHNM
F41	Other anxiety disorders	N94	Pain and oth cond assoc w fem gntl org and menstrual cycle	1.70339	0.309203	1.09736	2.30942	0.0849691	0.166017	Women	Mental, Behavioral and Neurodevelopmental disorders	Diseases of the genitourinary system	MHNM
F34	Persistent mood [affective] disorders	F43	Reaction to severe stress, and adjustment disorders	1.16335	0.350304	0.476771	1.84994	0.66579	0.748277	Women	Mental, Behavioral and Neurodevelopmental disorders	Mental, Behavioral and Neurodevelopmental disorders	MHNM
G56	Mononeuropathies of upper limb	I10	Essential (primary) hypertension	1.09281	0.365641	0.376163	1.80945	0.80822	0.875255	Women	Diseases of the nervous system	Diseases of the circulatory system	MHNM - CMD
G43	Migraine	J30	Vasomotor and allergic rhinitis	2.93653	0.279701	2.38832	3.48473	0.000117466	0.00313997	Women	Diseases of the nervous system	Diseases of the respiratory system	MHNM - RESP
M51	Thoracic, thoracolum, and lumbosacral intvrt disc disorders	F41	Other anxiety disorders	2.32705	0.299189	1.74065	2.91345	0.00475802	0.0228459	Women	Diseases of the musculoskeletal system and connective tissue	Mental, Behavioral and Neurodevelopmental disorders	MHNM
F17	Nicotine dependence	M12	Other and unspecified arthropathy	0.930455	0.38435	0.177143	1.68377	0.851235	0.900891	Women	Mental, Behavioral and Neurodevelopmental disorders	Diseases of the musculoskeletal system and connective tissue	MHNM
N95	Menopausal and other perimenopausal disorders	M81	Osteoporosis without current pathological fracture	0.968669	0.409971	0.165141	1.7722	0.938109	0.953119	Women	Diseases of the genitourinary system	Diseases of the musculoskeletal system and connective tissue	MHNM
F43	Reaction to severe stress, and adjustment disorders	N92	Excessive, frequent and irregular menstruation	2.3909	0.295394	1.81193	2.96986	0.00316884	0.0182929	Women	Mental, Behavioral and Neurodevelopmental disorders	Diseases of the genitourinary system	MHNM
F51	Sleep disorders not due to a substance or known physiol cond	E78	Disorders of lipoprotein metabolism and other lipidemias	1.89654	0.321828	1.26577	2.52731	0.0467301	0.118694	Women	Mental, Behavioral and Neurodevelopmental disorders	Endocrine, nutritional and metabolic diseases	MHNM - CMD
H60	Otitis externa	E66	Overweight and obesity	1.60086	0.330337	0.953415	2.24831	0.154321	0.246268	Women	Diseases of the ear and mastoid process	Endocrine, nutritional and metabolic diseases	MHNM - CMD
N92	Excessive, frequent and irregular menstruation	G56	Mononeuropathies of upper limb	1.80835	0.322082	1.17708	2.43962	0.0658666	0.144618	Women	Diseases of the genitourinary system	Diseases of the nervous system	MHNM
E66	Overweight and obesity	M23	Internal derangement of knee	2.17401	0.315471	1.55569	2.79232	0.013831	0.0501869	Women	Endocrine, nutritional and metabolic diseases	Diseases of the musculoskeletal system and connective tissue	CMD - MHNM
J30	Vasomotor and allergic rhinitis	G43	Migraine	2.56671	0.297976	1.98268	3.15073	0.00155926	0.0141447	Women	Diseases of the respiratory system	Diseases of the nervous system	RESP - MHNM
F51	Sleep disorders not due to a substance or known physiol cond	N95	Menopausal and other perimenopausal disorders	0.626362	0.472269	-0.299267	1.55199	0.321884	0.444339	Women	Mental, Behavioral and Neurodevelopmental disorders	Diseases of the genitourinary system	MHNM
N92	Excessive, frequent and irregular menstruation	F32	Major depressive disorder, single episode	1.88163	0.323192	1.24818	2.51507	0.0504754	0.125235	Women	Diseases of the genitourinary system	Mental, Behavioral and Neurodevelopmental disorders	MHNM
F34	Persistent mood [affective] disorders	N92	Excessive, frequent and irregular menstruation	1.61733	0.332155	0.966317	2.26834	0.147773	0.245387	Women	Mental, Behavioral and Neurodevelopmental disorders	Diseases of the genitourinary system	MHNM
G43	Migraine	F43	Reaction to severe stress, and adjustment disorders	1.67685	0.333129	1.02393	2.32977	0.120735	0.222222	Women	Diseases of the nervous system	Mental, Behavioral and Neurodevelopmental disorders	MHNM
G56	Mononeuropathies of upper limb	N92	Excessive, frequent and irregular menstruation	1.49961	0.34322	0.826915	2.17231	0.237759	0.339274	Women	Diseases of the nervous system	Diseases of the genitourinary system	MHNM
F32	Major depressive disorder, single episode	H91	Other and unspecified hearing loss	1.61875	0.343674	0.945157	2.29233	0.161071	0.249506	Women	Mental, Behavioral and Neurodevelopmental disorders	Diseases of the ear and mastoid process	MHNM
F32	Major depressive disorder, single episode	G43	Migraine	2.00717	0.325391	1.36941	2.64492	0.0322589	0.0890627	Women	Mental, Behavioral and Neurodevelopmental disorders	Diseases of the nervous system	MHNM
I10	Essential (primary) hypertension	E11	Type 2 diabetes mellitus	1.83704	0.346523	1.15787	2.51622	0.079255	0.157272	Women	Diseases of the circulatory system	Endocrine, nutritional and metabolic diseases	CMD
G56	Mononeuropathies of upper limb	F32	Major depressive disorder, single episode	0.807579	0.43773	-0.0503556	1.66551	0.625384	0.715529	Women	Diseases of the nervous system	Mental, Behavioral and Neurodevelopmental disorders	MHNM
F32	Major depressive disorder, single episode	M51	Thoracic, thoracolum, and lumbosacral intvrt disc disorders	2.01556	0.325565	1.37746	2.65365	0.0313295	0.0890627	Women	Mental, Behavioral and Neurodevelopmental disorders	Diseases of the musculoskeletal system and connective tissue	MHNM
F41	Other anxiety disorders	H65	Nonsuppurative otitis media	2.97627	0.301839	2.38468	3.56787	0.000302175	0.00411377	Women	Mental, Behavioral and Neurodevelopmental disorders	Diseases of the ear and mastoid process	MHNM
I10	Essential (primary) hypertension	K21	Gastro-esophageal reflux disease	2.98155	0.307935	2.37801	3.58509	0.000388703	0.00411377	Women	Diseases of the circulatory system	Diseases of the digestive system	CMD
E66	Overweight and obesity	E11	Type 2 diabetes mellitus	1.59565	0.358301	0.893394	2.29791	0.192179	0.283799	Women	Endocrine, nutritional and metabolic diseases	Endocrine, nutritional and metabolic diseases	CMD
G43	Migraine	F17	Nicotine dependence	1.23662	0.371581	0.508333	1.9649	0.567621	0.66748	Women	Diseases of the nervous system	Mental, Behavioral and Neurodevelopmental disorders	MHNM
N92	Excessive, frequent and irregular menstruation	F43	Reaction to severe stress, and adjustment disorders	1.60489	0.345111	0.928488	2.2813	0.170456	0.260818	Women	Diseases of the genitourinary system	Mental, Behavioral and Neurodevelopmental disorders	MHNM
M81	Osteoporosis without current pathological fracture	E78	Disorders of lipoprotein metabolism and other lipidemias	0.446755	0.600887	-0.730962	1.62447	0.179945	0.268859	Women	Diseases of the musculoskeletal system and connective tissue	Endocrine, nutritional and metabolic diseases	MHNM - CMD
E78	Disorders of lipoprotein metabolism and other lipidemias	M47	Spondylosis	2.06533	0.336946	1.40492	2.72573	0.0313553	0.0890627	Women	Endocrine, nutritional and metabolic diseases	Diseases of the musculoskeletal system and connective tissue	CMD - MHNM
J30	Vasomotor and allergic rhinitis	H91	Other and unspecified hearing loss	2.1092	0.326791	1.4687	2.7497	0.0223864	0.0724328	Women	Diseases of the respiratory system	Diseases of the ear and mastoid process	RESP - MHNM
E78	Disorders of lipoprotein metabolism and other lipidemias	I10	Essential (primary) hypertension	1.2809	0.220713	0.848312	1.71349	0.262008	0.760432	Men	Endocrine, nutritional and metabolic diseases	Diseases of the circulatory system	CMD
I10	Essential (primary) hypertension	E66	Overweight and obesity	1.15261	0.241666	0.678952	1.62626	0.556732	0.876282	Men	Diseases of the circulatory system	Endocrine, nutritional and metabolic diseases	CMD
I10	Essential (primary) hypertension	E78	Disorders of lipoprotein metabolism and other lipidemias	1.5886	0.22428	1.14902	2.02818	0.0390425	0.755911	Men	Diseases of the circulatory system	Endocrine, nutritional and metabolic diseases	CMD
E78	Disorders of lipoprotein metabolism and other lipidemias	E66	Overweight and obesity	1.18535	0.245976	0.703248	1.66746	0.489386	0.876282	Men	Endocrine, nutritional and metabolic diseases	Endocrine, nutritional and metabolic diseases	CMD
E78	Disorders of lipoprotein metabolism and other lipidemias	N40	Enlarged prostate	0.902024	0.302013	0.310088	1.49396	0.732784	0.879341	Men	Endocrine, nutritional and metabolic diseases	Diseases of the genitourinary system	CMD - MHNM
I10	Essential (primary) hypertension	N40	Enlarged prostate	0.887299	0.326276	0.24781	1.52679	0.714007	0.876282	Men	Diseases of the circulatory system	Diseases of the genitourinary system	CMD - MHNM
E66	Overweight and obesity	I10	Essential (primary) hypertension	1.50173	0.259318	0.993478	2.00999	0.116873	0.760432	Men	Endocrine, nutritional and metabolic diseases	Diseases of the circulatory system	CMD
E66	Overweight and obesity	E78	Disorders of lipoprotein metabolism and other lipidemias	1.75782	0.255161	1.25772	2.25793	0.027059	0.755911	Men	Endocrine, nutritional and metabolic diseases	Endocrine, nutritional and metabolic diseases	CMD
F17	Nicotine dependence	F18	Inhalant related disorders	0.966653	0.336321	0.307476	1.62583	0.919675	0.990519	Men	Mental, Behavioral and Neurodevelopmental disorders	Mental, Behavioral and Neurodevelopmental disorders	MHNM
E78	Disorders of lipoprotein metabolism and other lipidemias	H91	Other and unspecified hearing loss	1.73929	0.306665	1.13824	2.34035	0.0711008	0.755911	Men	Endocrine, nutritional and metabolic diseases	Diseases of the ear and mastoid process	CMD - MHNM
F32	Major depressive disorder, single episode	F39	Unspecified mood [affective] disorder	1.4518	0.32711	0.810675	2.09292	0.254416	0.760432	Men	Mental, Behavioral and Neurodevelopmental disorders	Mental, Behavioral and Neurodevelopmental disorders	MHNM
E78	Disorders of lipoprotein metabolism and other lipidemias	K76	Other diseases of liver	1.46549	0.34366	0.791931	2.13905	0.266087	0.760432	Men	Endocrine, nutritional and metabolic diseases	Diseases of the digestive system	CMD
I10	Essential (primary) hypertension	E11	Type 2 diabetes mellitus	0.845354	0.430557	0.0014786	1.68923	0.696395	0.876282	Men	Diseases of the circulatory system	Endocrine, nutritional and metabolic diseases	CMD
E66	Overweight and obesity	G47	Sleep disorders	1.82139	0.318121	1.19788	2.44489	0.0594546	0.755911	Men	Endocrine, nutritional and metabolic diseases	Diseases of the nervous system	CMD - MHNM
F41	Other anxiety disorders	F34	Persistent mood [affective] disorders	1.15231	0.377045	0.413318	1.89131	0.706913	0.876282	Men	Mental, Behavioral and Neurodevelopmental disorders	Mental, Behavioral and Neurodevelopmental disorders	MHNM
F41	Other anxiety disorders	J30	Vasomotor and allergic rhinitis	1.21941	0.378225	0.478106	1.96072	0.599948	0.876282	Men	Mental, Behavioral and Neurodevelopmental disorders	Diseases of the respiratory system	MHNM - RESP
F41	Other anxiety disorders	F32	Major depressive disorder, single episode	1.23751	0.378463	0.495736	1.97928	0.573386	0.876282	Men	Mental, Behavioral and Neurodevelopmental disorders	Mental, Behavioral and Neurodevelopmental disorders	MHNM
E78	Disorders of lipoprotein metabolism and other lipidemias	E11	Type 2 diabetes mellitus	0.794451	0.468785	-0.124352	1.71325	0.623531	0.876282	Men	Endocrine, nutritional and metabolic diseases	Endocrine, nutritional and metabolic diseases	CMD
I10	Essential (primary) hypertension	G47	Sleep disorders	1.84346	0.348799	1.15982	2.52709	0.0795042	0.755911	Men	Diseases of the circulatory system	Diseases of the nervous system	CMD - MHNM
F17	Nicotine dependence	G47	Sleep disorders	1.44257	0.38137	0.695103	2.19004	0.336641	0.785439	Men	Mental, Behavioral and Neurodevelopmental disorders	Diseases of the nervous system	MHNM
E66	Overweight and obesity	E11	Type 2 diabetes mellitus	0.731737	0.520615	-0.288649	1.75212	0.548551	0.876282	Men	Endocrine, nutritional and metabolic diseases	Endocrine, nutritional and metabolic diseases	CMD
I10	Essential (primary) hypertension	K76	Other diseases of liver	1.63223	0.384966	0.877713	2.38675	0.203123	0.760432	Men	Diseases of the circulatory system	Diseases of the digestive system	CMD
E66	Overweight and obesity	K76	Other diseases of liver	1.59846	0.38387	0.846089	2.35083	0.221755	0.760432	Men	Endocrine, nutritional and metabolic diseases	Diseases of the digestive system	CMD
J30	Vasomotor and allergic rhinitis	F41	Other anxiety disorders	1.51518	0.383464	0.763609	2.26676	0.278524	0.760432	Men	Diseases of the respiratory system	Mental, Behavioral and Neurodevelopmental disorders	RESP - MHNM
E11	Type 2 diabetes mellitus	E66	Overweight and obesity	1.02873	0.472993	0.101683	1.95578	0.952244	0.990519	Men	Endocrine, nutritional and metabolic diseases	Endocrine, nutritional and metabolic diseases	CMD
F41	Other anxiety disorders	F43	Reaction to severe stress, and adjustment disorders	0.794306	0.52247	-0.229716	1.81833	0.659384	0.876282	Men	Mental, Behavioral and Neurodevelopmental disorders	Mental, Behavioral and Neurodevelopmental disorders	MHNM
F17	Nicotine dependence	E11	Type 2 diabetes mellitus	1.36934	0.437897	0.511073	2.2276	0.472876	0.876282	Men	Mental, Behavioral and Neurodevelopmental disorders	Endocrine, nutritional and metabolic diseases	MHNM - CMD
E78	Disorders of lipoprotein metabolism and other lipidemias	M10	Gout	0.916646	0.525059	-0.11245	1.94574	0.868346	0.990519	Men	Endocrine, nutritional and metabolic diseases	Diseases of the musculoskeletal system and connective tissue	CMD - MHNM
F17	Nicotine dependence	F10	Alcohol related disorders	0.665643	0.598148	-0.506706	1.83799	0.496228	0.876282	Men	Mental, Behavioral and Neurodevelopmental disorders	Mental, Behavioral and Neurodevelopmental disorders	MHNM
E11	Type 2 diabetes mellitus	E78	Disorders of lipoprotein metabolism and other lipidemias	1.51195	0.441491	0.64664	2.37725	0.349084	0.785439	Men	Endocrine, nutritional and metabolic diseases	Endocrine, nutritional and metabolic diseases	CMD
F41	Other anxiety disorders	G47	Sleep disorders	1.95824	0.388919	1.19598	2.72051	0.0839901	0.755911	Men	Mental, Behavioral and Neurodevelopmental disorders	Diseases of the nervous system	MHNM
N40	Enlarged prostate	E78	Disorders of lipoprotein metabolism and other lipidemias	1.00581	0.529577	-0.0321401	2.04376	0.991271	0.991271	Men	Diseases of the genitourinary system	Endocrine, nutritional and metabolic diseases	MHNM - CMD
N40	Enlarged prostate	I10	Essential (primary) hypertension	1.59613	0.443287	0.727307	2.46496	0.291512	0.760432	Men	Diseases of the genitourinary system	Diseases of the circulatory system	MHNM - CMD
J30	Vasomotor and allergic rhinitis	J45	Asthma	1.71723	0.41286	0.908044	2.52642	0.190303	0.760432	Men	Diseases of the respiratory system	Diseases of the respiratory system	RESP
F41	Other anxiety disorders	F51	Sleep disorders not due to a substance or known physiol cond	1.26207	0.476733	0.327689	2.19645	0.625391	0.876282	Men	Mental, Behavioral and Neurodevelopmental disorders	Mental, Behavioral and Neurodevelopmental disorders	MHNM
H91	Other and unspecified hearing loss	E78	Disorders of lipoprotein metabolism and other lipidemias	1.02004	0.526674	-0.0122185	2.05231	0.969943	0.990519	Men	Diseases of the ear and mastoid process	Endocrine, nutritional and metabolic diseases	MHNM - CMD
J45	Asthma	J30	Vasomotor and allergic rhinitis	0.468407	0.72531	-0.953175	1.88999	0.295724	0.760432	Men	Diseases of the respiratory system	Diseases of the respiratory system	RESP
F41	Other anxiety disorders	F39	Unspecified mood [affective] disorder	1.33893	0.477992	0.402078	2.27577	0.541457	0.876282	Men	Mental, Behavioral and Neurodevelopmental disorders	Mental, Behavioral and Neurodevelopmental disorders	MHNM
E78	Disorders of lipoprotein metabolism and other lipidemias	H40	Glaucoma	0.796244	0.601792	-0.383246	1.97574	0.704972	0.876282	Men	Endocrine, nutritional and metabolic diseases	Diseases of the eye and adnexa	CMD - MHNM
E11	Type 2 diabetes mellitus	I10	Essential (primary) hypertension	1.75044	0.444555	0.87913	2.62175	0.207889	0.760432	Men	Endocrine, nutritional and metabolic diseases	Diseases of the circulatory system	CMD
G47	Sleep disorders	E66	Overweight and obesity	1.3832	0.478718	0.444926	2.32147	0.498002	0.876282	Men	Diseases of the nervous system	Endocrine, nutritional and metabolic diseases	MHNM - CMD
F32	Major depressive disorder, single episode	F41	Other anxiety disorders	0.782984	0.60109	-0.39513	1.9611	0.684009	0.876282	Men	Mental, Behavioral and Neurodevelopmental disorders	Mental, Behavioral and Neurodevelopmental disorders	MHNM
E78	Disorders of lipoprotein metabolism and other lipidemias	K57	Diverticular disease of intestine	0.835289	0.603522	-0.347593	2.01817	0.765541	0.898679	Men	Endocrine, nutritional and metabolic diseases	Diseases of the digestive system	CMD
G47	Sleep disorders	N40	Enlarged prostate	1.59242	0.483464	0.644847	2.53999	0.335882	0.785439	Men	Diseases of the nervous system	Diseases of the genitourinary system	MHNM
I10	Essential (primary) hypertension	M17	Osteoarthritis of knee	0.945461	0.607123	-0.244479	2.1354	0.9264	0.990519	Men	Diseases of the circulatory system	Diseases of the musculoskeletal system and connective tissue	CMD - MHNM
E66	Overweight and obesity	M17	Osteoarthritis of knee	0.597446	0.729882	-0.833096	2.02799	0.480364	0.876282	Men	Endocrine, nutritional and metabolic diseases	Diseases of the musculoskeletal system and connective tissue	CMD - MHNM
I10	Essential (primary) hypertension	K57	Diverticular disease of intestine	1.33227	0.534878	0.283925	2.38061	0.591717	0.876282	Men	Diseases of the circulatory system	Diseases of the digestive system	CMD
E78	Disorders of lipoprotein metabolism and other lipidemias	F10	Alcohol related disorders	2.07768	0.449855	1.19598	2.95938	0.104049	0.760432	Men	Endocrine, nutritional and metabolic diseases	Mental, Behavioral and Neurodevelopmental disorders	CMD - MHNM
I10	Essential (primary) hypertension	M10	Gout	0.312425	1.01683	-1.68052	2.30537	0.252567	0.760432	Men	Diseases of the circulatory system	Diseases of the musculoskeletal system and connective tissue	CMD - MHNM
F32	Major depressive disorder, single episode	N40	Enlarged prostate	1.03311	0.608007	-0.158564	2.22478	0.957278	0.990519	Men	Mental, Behavioral and Neurodevelopmental disorders	Diseases of the genitourinary system	MHNM
G47	Sleep disorders	I10	Essential (primary) hypertension	1.79532	0.486391	0.842012	2.74863	0.228932	0.760432	Men	Diseases of the nervous system	Diseases of the circulatory system	MHNM - CMD
N40	Enlarged prostate	H91	Other and unspecified hearing loss	2.02467	0.493458	1.05751	2.99183	0.152857	0.760432	Men	Diseases of the genitourinary system	Diseases of the ear and mastoid process	MHNM
N40	Enlarged prostate	K76	Other diseases of liver	0.688739	0.732636	-0.747202	2.12468	0.610771	0.876282	Men	Diseases of the genitourinary system	Diseases of the digestive system	MHNM - CMD
E66	Overweight and obesity	M10	Gout	7.2277e-07	405.402	-794.574	794.574	0.972176	0.990519	Men	Endocrine, nutritional and metabolic diseases	Diseases of the musculoskeletal system and connective tissue	CMD - MHNM

## Sheet: Sup Table S6
Table S6. Enrichment of ICD-10 Chapter in long COVID associated disease trajectories. N background refers to the number of diseases included in the analysis and N significant the ones that were associated with long COVID.
Chapter	N background	N significant	OR	CI 95% lower	CI 95% upper	p-value	Analysis
Diseases of the circulatory system	8	3	1.1967	0.168822	6.89039	1	Both
Diseases of the digestive system	9	4	1.67066	0.296283	8.77812	0.474312	Both
Diseases of the ear and mastoid process	4	0	0	0	2.93992	0.291686	Both
Diseases of the musculoskeletal system and connective tissue	8	2	0.623143	0.056777	3.89644	0.707287	Both
Diseases of the nervous system	10	5	2.19415	0.444728	10.881	0.287962	Both
Diseases of the respiratory system	5	4	8.9434	0.815865	464.94	0.0414542	Both
Endocrine, nutritional and metabolic diseases	44	11	0.339238	0.10245	1.08493	0.0595145	Both
Mental, Behavioral and Neurodevelopmental disorders	48	17	1.27501	0.371561	4.82146	0.782039	Both
Diseases of the circulatory system	12	2	0.52109	0.0527319	2.64631	0.512661	Women
Diseases of the digestive system	7	5	7.68864	1.1831	84.9855	0.0147816	Women
Diseases of the ear and mastoid process	5	1	0.676126	0.013298	7.16499	1	Women
Diseases of the genitourinary system	22	4	0.557896	0.126828	1.89142	0.430175	Women
Diseases of the musculoskeletal system and connective tissue	21	3	0.405692	0.0714853	1.53891	0.187564	Women
Diseases of the nervous system	24	8	1.47594	0.487743	4.18613	0.447855	Women
Diseases of the respiratory system	8	6	9.53629	1.59244	101.747	0.00467936	Women
Endocrine, nutritional and metabolic diseases	61	11	0.414193	0.162385	1.00449	0.0444741	Women
Mental, Behavioral and Neurodevelopmental disorders	93	28	2.00005	0.705746	6.57237	0.181989	Women
Symptoms, signs and abnormal clinical and laboratory findings, not elsewhere classified	1	0	0	0	106.501	1	Women

## Sheet: Sup Table S7
Table S7. Enrichment of long COVID symptoms in long COVID associated disease trajectories.
Trajectory first ICD	Description first	Trajectory second ICD	Description second	Symptom	OR	CI 95% lower	CI 95% upper	P-value	Adjusted p-value	Analysis
F17	Nicotine dependence	F41	Other anxiety disorders	dry_eyes_mouth	0.97093	0.465994	1.86789	1	1	Both
F17	Nicotine dependence	F41	Other anxiety disorders	tingling_sensation	1.41141	0.479411	3.43809	0.443102	0.921073	Both
F17	Nicotine dependence	F41	Other anxiety disorders	dermatological	0.685102	0.278343	1.46867	0.397122	0.88066	Both
F17	Nicotine dependence	F41	Other anxiety disorders	fever	1.75018	0.0383678	13.9079	0.468936	0.938739	Both
F17	Nicotine dependence	F41	Other anxiety disorders	psychological	1.55963	0.891843	2.65373	0.0883163	0.705626	Both
F17	Nicotine dependence	F41	Other anxiety disorders	abdominal_pain	1.44521	0.159036	6.27301	0.649644	1	Both
F17	Nicotine dependence	F41	Other anxiety disorders	tiredness	1.33248	0.809307	2.1783	0.225904	0.802316	Both
F17	Nicotine dependence	F41	Other anxiety disorders	digestive	2.41042	0.94167	5.45471	0.0493235	0.585809	Both
F17	Nicotine dependence	F41	Other anxiety disorders	menstrual_disturbances	1.41141	0.479411	3.43809	0.443102	0.921073	Both
F17	Nicotine dependence	F41	Other anxiety disorders	chills	3.02179	1.0816	7.34877	0.017611	0.479996	Both
F17	Nicotine dependence	F41	Other anxiety disorders	endocrin	0.867583	0.0983131	3.55366	1	1	Both
F17	Nicotine dependence	F41	Other anxiety disorders	cardiovascular	1.71656	0.756078	3.53623	0.133663	0.731673	Both
F17	Nicotine dependence	F41	Other anxiety disorders	hematological	0	0	4.4262	1	1	Both
F17	Nicotine dependence	F41	Other anxiety disorders	respiratory_problems	1.47986	0.876984	2.45531	0.116655	0.731673	Both
F17	Nicotine dependence	F41	Other anxiety disorders	muscular	0.922906	0.553892	1.51688	0.81054	1	Both
F17	Nicotine dependence	F41	Other anxiety disorders	headache	1.07381	0.457384	2.24478	0.849716	1	Both
F17	Nicotine dependence	F41	Other anxiety disorders	cognitive	1.09745	0.61826	1.88413	0.786336	1	Both
F17	Nicotine dependence	F41	Other anxiety disorders	renal	2.47315	0.25899	11.9096	0.229125	0.802316	Both
F17	Nicotine dependence	F41	Other anxiety disorders	loss_taste_smell	0.733258	0.353313	1.40354	0.376245	0.88066	Both
F32	Major depressive disorder, single episode	F39	Unspecified mood [affective] disorder	dry_eyes_mouth	1.11577	0.53218	2.16443	0.73413	1	Both
F32	Major depressive disorder, single episode	F39	Unspecified mood [affective] disorder	tingling_sensation	1.28882	0.388912	3.35869	0.590857	1	Both
F32	Major depressive disorder, single episode	F39	Unspecified mood [affective] disorder	dermatological	0.78101	0.315855	1.6853	0.596827	1	Both
F32	Major depressive disorder, single episode	F39	Unspecified mood [affective] disorder	fever	0	0	8.12886	1	1	Both
F32	Major depressive disorder, single episode	F39	Unspecified mood [affective] disorder	psychological	1.06974	0.55936	1.94501	0.880691	1	Both
F32	Major depressive disorder, single episode	F39	Unspecified mood [affective] disorder	abdominal_pain	1.6288	0.178907	7.09253	0.374893	0.88066	Both
F32	Major depressive disorder, single episode	F39	Unspecified mood [affective] disorder	tiredness	2.2473	1.33936	3.79882	0.00126056	0.261644	Both
F32	Major depressive disorder, single episode	F39	Unspecified mood [affective] disorder	digestive	1.526	0.457547	4.01566	0.38557	0.88066	Both
F32	Major depressive disorder, single episode	F39	Unspecified mood [affective] disorder	menstrual_disturbances	0.996147	0.254361	2.82544	1	1	Both
F32	Major depressive disorder, single episode	F39	Unspecified mood [affective] disorder	chills	1.21792	0.233313	4.03302	0.734886	1	Both
F32	Major depressive disorder, single episode	F39	Unspecified mood [affective] disorder	endocrin	0.977962	0.1106	4.01996	1	1	Both
F32	Major depressive disorder, single episode	F39	Unspecified mood [affective] disorder	cardiovascular	1.04427	0.358178	2.50771	0.823965	1	Both
F32	Major depressive disorder, single episode	F39	Unspecified mood [affective] disorder	hematological	1.24871	0.0286082	8.82372	0.572644	1	Both
F32	Major depressive disorder, single episode	F39	Unspecified mood [affective] disorder	respiratory_problems	1.18766	0.668993	2.0513	0.494913	0.970058	Both
F32	Major depressive disorder, single episode	F39	Unspecified mood [affective] disorder	muscular	1.84007	1.09807	3.10064	0.0160866	0.479996	Both
F32	Major depressive disorder, single episode	F39	Unspecified mood [affective] disorder	headache	1.77603	0.838854	3.48781	0.107836	0.727882	Both
F32	Major depressive disorder, single episode	F39	Unspecified mood [affective] disorder	cognitive	1.71058	0.982496	2.92094	0.045491	0.585809	Both
F32	Major depressive disorder, single episode	F39	Unspecified mood [affective] disorder	renal	2.78667	0.291305	13.467	0.193974	0.758391	Both
F32	Major depressive disorder, single episode	F39	Unspecified mood [affective] disorder	loss_taste_smell	0.589677	0.252851	1.22219	0.161788	0.731673	Both
I10	Essential (primary) hypertension	E78	Disorders of lipoprotein metabolism and other lipidemias	dry_eyes_mouth	1.5215	0.736529	2.9452	0.201088	0.772265	Both
I10	Essential (primary) hypertension	E78	Disorders of lipoprotein metabolism and other lipidemias	tingling_sensation	1.53963	0.462017	4.04583	0.383231	0.88066	Both
I10	Essential (primary) hypertension	E78	Disorders of lipoprotein metabolism and other lipidemias	dermatological	0.423221	0.109713	1.17275	0.122393	0.731673	Both
I10	Essential (primary) hypertension	E78	Disorders of lipoprotein metabolism and other lipidemias	fever	0	0	9.61325	1	1	Both
I10	Essential (primary) hypertension	E78	Disorders of lipoprotein metabolism and other lipidemias	psychological	1.2119	0.614761	2.26811	0.521029	0.991696	Both
I10	Essential (primary) hypertension	E78	Disorders of lipoprotein metabolism and other lipidemias	abdominal_pain	0	0	3.49392	0.621157	1	Both
I10	Essential (primary) hypertension	E78	Disorders of lipoprotein metabolism and other lipidemias	tiredness	1.21882	0.687144	2.13404	0.492491	0.96976	Both
I10	Essential (primary) hypertension	E78	Disorders of lipoprotein metabolism and other lipidemias	digestive	1.82266	0.543506	4.83624	0.213513	0.795948	Both
I10	Essential (primary) hypertension	E78	Disorders of lipoprotein metabolism and other lipidemias	menstrual_disturbances	0.266426	0.00652153	1.60551	0.249041	0.802316	Both
I10	Essential (primary) hypertension	E78	Disorders of lipoprotein metabolism and other lipidemias	chills	0.920266	0.104693	3.73849	1	1	Both
I10	Essential (primary) hypertension	E78	Disorders of lipoprotein metabolism and other lipidemias	endocrin	1.15869	0.130594	4.79109	0.692532	1	Both
I10	Essential (primary) hypertension	E78	Disorders of lipoprotein metabolism and other lipidemias	cardiovascular	0.78324	0.201147	2.20209	0.811172	1	Both
I10	Essential (primary) hypertension	E78	Disorders of lipoprotein metabolism and other lipidemias	hematological	3.30045	0.343956	16.0246	0.151623	0.731673	Both
I10	Essential (primary) hypertension	E78	Disorders of lipoprotein metabolism and other lipidemias	respiratory_problems	1.10373	0.587126	2.00012	0.7675	1	Both
I10	Essential (primary) hypertension	E78	Disorders of lipoprotein metabolism and other lipidemias	muscular	1.63469	0.936389	2.8613	0.0771821	0.664408	Both
I10	Essential (primary) hypertension	E78	Disorders of lipoprotein metabolism and other lipidemias	headache	1.48307	0.623338	3.15803	0.285481	0.82776	Both
I10	Essential (primary) hypertension	E78	Disorders of lipoprotein metabolism and other lipidemias	cognitive	0.808679	0.394537	1.55077	0.645961	1	Both
I10	Essential (primary) hypertension	E78	Disorders of lipoprotein metabolism and other lipidemias	renal	5.59463	0.948725	23.2278	0.0284467	0.531168	Both
I10	Essential (primary) hypertension	E78	Disorders of lipoprotein metabolism and other lipidemias	loss_taste_smell	0.814816	0.361629	1.6638	0.736867	1	Both
E66	Overweight and obesity	E78	Disorders of lipoprotein metabolism and other lipidemias	dry_eyes_mouth	1.15525	0.484287	2.47144	0.693496	1	Both
E66	Overweight and obesity	E78	Disorders of lipoprotein metabolism and other lipidemias	tingling_sensation	1.42766	0.360579	4.12024	0.528824	0.997825	Both
E66	Overweight and obesity	E78	Disorders of lipoprotein metabolism and other lipidemias	dermatological	0.811749	0.277701	1.95868	0.835835	1	Both
E66	Overweight and obesity	E78	Disorders of lipoprotein metabolism and other lipidemias	fever	0	0	11.4574	1	1	Both
E66	Overweight and obesity	E78	Disorders of lipoprotein metabolism and other lipidemias	psychological	0.760661	0.320368	1.61753	0.601474	1	Both
E66	Overweight and obesity	E78	Disorders of lipoprotein metabolism and other lipidemias	abdominal_pain	0	0	4.16901	0.61912	1	Both
E66	Overweight and obesity	E78	Disorders of lipoprotein metabolism and other lipidemias	tiredness	1.19094	0.63777	2.18709	0.555075	1	Both
E66	Overweight and obesity	E78	Disorders of lipoprotein metabolism and other lipidemias	digestive	1.21069	0.232893	3.97875	0.736037	1	Both
E66	Overweight and obesity	E78	Disorders of lipoprotein metabolism and other lipidemias	menstrual_disturbances	0.659746	0.0758203	2.62895	0.763268	1	Both
E66	Overweight and obesity	E78	Disorders of lipoprotein metabolism and other lipidemias	chills	0	0	2.00643	0.252876	0.803123	Both
E66	Overweight and obesity	E78	Disorders of lipoprotein metabolism and other lipidemias	endocrin	1.38433	0.155454	5.76512	0.656945	1	Both
E66	Overweight and obesity	E78	Disorders of lipoprotein metabolism and other lipidemias	cardiovascular	0.440385	0.0509799	1.73186	0.428348	0.906056	Both
E66	Overweight and obesity	E78	Disorders of lipoprotein metabolism and other lipidemias	hematological	0	0	7.03495	1	1	Both
E66	Overweight and obesity	E78	Disorders of lipoprotein metabolism and other lipidemias	respiratory_problems	1.85335	0.989814	3.41329	0.0379878	0.585809	Both
E66	Overweight and obesity	E78	Disorders of lipoprotein metabolism and other lipidemias	muscular	1.45532	0.793295	2.66517	0.191256	0.758391	Both
E66	Overweight and obesity	E78	Disorders of lipoprotein metabolism and other lipidemias	headache	1.32233	0.489818	3.06142	0.488209	0.964837	Both
E66	Overweight and obesity	E78	Disorders of lipoprotein metabolism and other lipidemias	cognitive	0.710485	0.312576	1.46921	0.41006	0.888731	Both
E66	Overweight and obesity	E78	Disorders of lipoprotein metabolism and other lipidemias	renal	1.75694	0.0400556	12.5314	0.458476	0.931491	Both
E66	Overweight and obesity	E78	Disorders of lipoprotein metabolism and other lipidemias	loss_taste_smell	0.756912	0.302302	1.66354	0.588062	1	Both
F41	Other anxiety disorders	F32	Major depressive disorder, single episode	dry_eyes_mouth	1.1477	0.505783	2.36538	0.708054	1	Both
F41	Other anxiety disorders	F32	Major depressive disorder, single episode	tingling_sensation	1.25801	0.319115	3.60591	0.562221	1	Both
F41	Other anxiety disorders	F32	Major depressive disorder, single episode	dermatological	1.16229	0.489882	2.46673	0.693934	1	Both
F41	Other anxiety disorders	F32	Major depressive disorder, single episode	fever	0	0	10.1624	1	1	Both
F41	Other anxiety disorders	F32	Major depressive disorder, single episode	psychological	2.39358	1.30662	4.30311	0.00273471	0.261644	Both
F41	Other anxiety disorders	F32	Major depressive disorder, single episode	abdominal_pain	2.04085	0.223216	8.95098	0.283981	0.82776	Both
F41	Other anxiety disorders	F32	Major depressive disorder, single episode	tiredness	1.55654	0.874925	2.75787	0.120674	0.731673	Both
F41	Other anxiety disorders	F32	Major depressive disorder, single episode	digestive	1.93402	0.57548	5.147	0.196581	0.763071	Both
F41	Other anxiety disorders	F32	Major depressive disorder, single episode	menstrual_disturbances	0.281617	0.00688723	1.7005	0.247748	0.802316	Both
F41	Other anxiety disorders	F32	Major depressive disorder, single episode	chills	1.5319	0.291816	5.11838	0.45378	0.930765	Both
F41	Other anxiety disorders	F32	Major depressive disorder, single episode	endocrin	1.9428	0.365815	6.62438	0.228494	0.802316	Both
F41	Other anxiety disorders	F32	Major depressive disorder, single episode	cardiovascular	1.60373	0.593278	3.71753	0.315832	0.847007	Both
F41	Other anxiety disorders	F32	Major depressive disorder, single episode	hematological	1.55923	0.035616	11.0836	0.497236	0.971526	Both
F41	Other anxiety disorders	F32	Major depressive disorder, single episode	respiratory_problems	1.53165	0.833421	2.75167	0.131929	0.731673	Both
F41	Other anxiety disorders	F32	Major depressive disorder, single episode	muscular	1.46519	0.825778	2.59642	0.166666	0.731673	Both
F41	Other anxiety disorders	F32	Major depressive disorder, single episode	headache	1.58109	0.662438	3.38163	0.26927	0.821462	Both
F41	Other anxiety disorders	F32	Major depressive disorder, single episode	cognitive	1.39176	0.734892	2.54619	0.273002	0.824258	Both
F41	Other anxiety disorders	F32	Major depressive disorder, single episode	renal	3.49083	0.363392	16.9806	0.139389	0.731673	Both
F41	Other anxiety disorders	F32	Major depressive disorder, single episode	loss_taste_smell	0.297143	0.0771923	0.821253	0.0147493	0.479996	Both
G43	Migraine	F41	Other anxiety disorders	dry_eyes_mouth	1.69877	0.693265	3.77739	0.174143	0.739596	Both
G43	Migraine	F41	Other anxiety disorders	tingling_sensation	0.910407	0.103637	3.69387	1	1	Both
G43	Migraine	F41	Other anxiety disorders	dermatological	1.67547	0.649788	3.84102	0.229046	0.802316	Both
G43	Migraine	F41	Other anxiety disorders	fever	3.79035	0.0821043	30.7648	0.260717	0.812729	Both
G43	Migraine	F41	Other anxiety disorders	psychological	2.16752	1.01767	4.45178	0.0276173	0.524728	Both
G43	Migraine	F41	Other anxiety disorders	abdominal_pain	1.4603	0.0341533	9.76239	0.513922	0.985094	Both
G43	Migraine	F41	Other anxiety disorders	tiredness	1.38189	0.675097	2.79035	0.392689	0.88066	Both
G43	Migraine	F41	Other anxiety disorders	digestive	3.10714	0.904915	8.54202	0.0354637	0.583794	Both
G43	Migraine	F41	Other anxiety disorders	menstrual_disturbances	0.910407	0.103637	3.69387	1	1	Both
G43	Migraine	F41	Other anxiety disorders	chills	3.40839	0.830775	10.4043	0.0434866	0.585809	Both
G43	Migraine	F41	Other anxiety disorders	endocrin	1.90914	0.212345	8.08619	0.304934	0.847007	Both
G43	Migraine	F41	Other anxiety disorders	cardiovascular	2.1623	0.717254	5.45824	0.121192	0.731673	Both
G43	Migraine	F41	Other anxiety disorders	hematological	0	0	9.66161	1	1	Both
G43	Migraine	F41	Other anxiety disorders	respiratory_problems	1.04485	0.46115	2.21204	0.856234	1	Both
G43	Migraine	F41	Other anxiety disorders	muscular	0.967664	0.46341	1.96349	1	1	Both
G43	Migraine	F41	Other anxiety disorders	headache	2.2719	0.87638	5.24402	0.0572124	0.607462	Both
G43	Migraine	F41	Other anxiety disorders	cognitive	1.98437	0.946713	4.04258	0.055086	0.607462	Both
G43	Migraine	F41	Other anxiety disorders	renal	2.40476	0.0544858	17.3639	0.364928	0.88066	Both
G43	Migraine	F41	Other anxiety disorders	loss_taste_smell	0.765572	0.258016	1.89128	0.679069	1	Both
F41	Other anxiety disorders	G56	Mononeuropathies of upper limb	dry_eyes_mouth	2.45066	1.06501	5.29402	0.0193147	0.479996	Both
F41	Other anxiety disorders	G56	Mononeuropathies of upper limb	tingling_sensation	5.26013	1.97112	12.6212	0.000617505	0.261644	Both
F41	Other anxiety disorders	G56	Mononeuropathies of upper limb	dermatological	0.549586	0.106418	1.78874	0.462735	0.931491	Both
F41	Other anxiety disorders	G56	Mononeuropathies of upper limb	fever	0	0	16.6577	1	1	Both
F41	Other anxiety disorders	G56	Mononeuropathies of upper limb	psychological	1.39957	0.592598	3.05693	0.409941	0.888731	Both
F41	Other anxiety disorders	G56	Mononeuropathies of upper limb	abdominal_pain	3.37017	0.363553	15.1421	0.140321	0.731673	Both
F41	Other anxiety disorders	G56	Mononeuropathies of upper limb	tiredness	1.71952	0.832338	3.55289	0.115975	0.731673	Both
F41	Other anxiety disorders	G56	Mononeuropathies of upper limb	digestive	1.78845	0.339045	6.02507	0.417541	0.89367	Both
F41	Other anxiety disorders	G56	Mononeuropathies of upper limb	menstrual_disturbances	0.965976	0.109732	3.93507	1	1	Both
F41	Other anxiety disorders	G56	Mononeuropathies of upper limb	chills	2.56046	0.479082	8.81565	0.135499	0.731673	Both
F41	Other anxiety disorders	G56	Mononeuropathies of upper limb	endocrin	2.02541	0.22482	8.6107	0.282814	0.82776	Both
F41	Other anxiety disorders	G56	Mononeuropathies of upper limb	cardiovascular	0.645165	0.0738083	2.59478	0.761847	1	Both
F41	Other anxiety disorders	G56	Mononeuropathies of upper limb	hematological	0	0	10.2415	1	1	Both
F41	Other anxiety disorders	G56	Mononeuropathies of upper limb	respiratory_problems	1.1315	0.495577	2.42249	0.709156	1	Both
F41	Other anxiety disorders	G56	Mononeuropathies of upper limb	muscular	1.69109	0.821105	3.51016	0.123001	0.731673	Both
F41	Other anxiety disorders	G56	Mononeuropathies of upper limb	headache	1.33512	0.396831	3.56622	0.581867	1	Both
F41	Other anxiety disorders	G56	Mononeuropathies of upper limb	cognitive	1.31433	0.575048	2.81729	0.439774	0.91945	Both
F41	Other anxiety disorders	G56	Mononeuropathies of upper limb	renal	0	0	10.2415	1	1	Both
F41	Other anxiety disorders	G56	Mononeuropathies of upper limb	loss_taste_smell	0.99414	0.362123	2.36399	1	1	Both
E78	Disorders of lipoprotein metabolism and other lipidemias	K21	Gastro-esophageal reflux disease	dry_eyes_mouth	2.25708	0.897044	5.21892	0.0467808	0.585809	Both
E78	Disorders of lipoprotein metabolism and other lipidemias	K21	Gastro-esophageal reflux disease	tingling_sensation	1.80094	0.340148	6.10943	0.416184	0.89367	Both
E78	Disorders of lipoprotein metabolism and other lipidemias	K21	Gastro-esophageal reflux disease	dermatological	0.907991	0.227432	2.66271	1	1	Both
E78	Disorders of lipoprotein metabolism and other lipidemias	K21	Gastro-esophageal reflux disease	fever	4.70346	0.101367	38.5643	0.217738	0.795948	Both
E78	Disorders of lipoprotein metabolism and other lipidemias	K21	Gastro-esophageal reflux disease	psychological	2.02542	0.862371	4.51512	0.0751592	0.6641	Both
E78	Disorders of lipoprotein metabolism and other lipidemias	K21	Gastro-esophageal reflux disease	abdominal_pain	3.96961	0.425568	18.0297	0.109333	0.727882	Both
E78	Disorders of lipoprotein metabolism and other lipidemias	K21	Gastro-esophageal reflux disease	tiredness	0.798094	0.331754	1.79356	0.706545	1	Both
E78	Disorders of lipoprotein metabolism and other lipidemias	K21	Gastro-esophageal reflux disease	digestive	3.97055	1.13852	11.1802	0.0156219	0.479996	Both
E78	Disorders of lipoprotein metabolism and other lipidemias	K21	Gastro-esophageal reflux disease	menstrual_disturbances	0	0	2.07561	0.252134	0.803123	Both
E78	Disorders of lipoprotein metabolism and other lipidemias	K21	Gastro-esophageal reflux disease	chills	4.32047	1.03946	13.463	0.0221972	0.48995	Both
E78	Disorders of lipoprotein metabolism and other lipidemias	K21	Gastro-esophageal reflux disease	endocrin	2.38615	0.263191	10.2636	0.227604	0.802316	Both
E78	Disorders of lipoprotein metabolism and other lipidemias	K21	Gastro-esophageal reflux disease	cardiovascular	1.67615	0.416029	4.98154	0.315587	0.847007	Both
E78	Disorders of lipoprotein metabolism and other lipidemias	K21	Gastro-esophageal reflux disease	hematological	0	0	12.0349	1	1	Both
E78	Disorders of lipoprotein metabolism and other lipidemias	K21	Gastro-esophageal reflux disease	respiratory_problems	2.16333	0.972875	4.73393	0.0412848	0.585809	Both
E78	Disorders of lipoprotein metabolism and other lipidemias	K21	Gastro-esophageal reflux disease	muscular	1.40692	0.639927	3.07706	0.357905	0.88066	Both
E78	Disorders of lipoprotein metabolism and other lipidemias	K21	Gastro-esophageal reflux disease	headache	2.47766	0.879682	6.11123	0.0695098	0.660343	Both
E78	Disorders of lipoprotein metabolism and other lipidemias	K21	Gastro-esophageal reflux disease	cognitive	1.02965	0.393044	2.4219	1	1	Both
E78	Disorders of lipoprotein metabolism and other lipidemias	K21	Gastro-esophageal reflux disease	renal	2.98552	0.0672707	21.8004	0.308631	0.847007	Both
E78	Disorders of lipoprotein metabolism and other lipidemias	K21	Gastro-esophageal reflux disease	loss_taste_smell	0.27713	0.0317779	1.11123	0.0663321	0.64118	Both
F41	Other anxiety disorders	M51	Thoracic, thoracolum, and lumbosacral intvrt disc disorders	dry_eyes_mouth	1.58551	0.650607	3.49767	0.264708	0.812729	Both
F41	Other anxiety disorders	M51	Thoracic, thoracolum, and lumbosacral intvrt disc disorders	tingling_sensation	0.860681	0.0981622	3.47961	1	1	Both
F41	Other anxiety disorders	M51	Thoracic, thoracolum, and lumbosacral intvrt disc disorders	dermatological	0.314173	0.0363223	1.23935	0.105976	0.727882	Both
F41	Other anxiety disorders	M51	Thoracic, thoracolum, and lumbosacral intvrt disc disorders	fever	0	0	14.8805	1	1	Both
F41	Other anxiety disorders	M51	Thoracic, thoracolum, and lumbosacral intvrt disc disorders	psychological	1.56998	0.714485	3.2529	0.238775	0.802316	Both
F41	Other anxiety disorders	M51	Thoracic, thoracolum, and lumbosacral intvrt disc disorders	abdominal_pain	1.38267	0.0323785	9.21797	0.532392	0.997825	Both
F41	Other anxiety disorders	M51	Thoracic, thoracolum, and lumbosacral intvrt disc disorders	tiredness	1.12974	0.553065	2.24992	0.740003	1	Both
F41	Other anxiety disorders	M51	Thoracic, thoracolum, and lumbosacral intvrt disc disorders	digestive	2.22467	0.552396	6.59456	0.131185	0.731673	Both
F41	Other anxiety disorders	M51	Thoracic, thoracolum, and lumbosacral intvrt disc disorders	menstrual_disturbances	0.860681	0.0981622	3.47961	1	1	Both
F41	Other anxiety disorders	M51	Thoracic, thoracolum, and lumbosacral intvrt disc disorders	chills	2.2749	0.427741	7.76612	0.170251	0.731673	Both
F41	Other anxiety disorders	M51	Thoracic, thoracolum, and lumbosacral intvrt disc disorders	endocrin	0	0	3.28173	0.626093	1	Both
F41	Other anxiety disorders	M51	Thoracic, thoracolum, and lumbosacral intvrt disc disorders	cardiovascular	1.62229	0.482669	4.32243	0.370484	0.88066	Both
F41	Other anxiety disorders	M51	Thoracic, thoracolum, and lumbosacral intvrt disc disorders	hematological	2.27713	0.051655	16.4014	0.380223	0.88066	Both
F41	Other anxiety disorders	M51	Thoracic, thoracolum, and lumbosacral intvrt disc disorders	respiratory_problems	2.16592	1.07666	4.3045	0.0194308	0.479996	Both
F41	Other anxiety disorders	M51	Thoracic, thoracolum, and lumbosacral intvrt disc disorders	muscular	1.36014	0.682006	2.69623	0.411131	0.888731	Both
F41	Other anxiety disorders	M51	Thoracic, thoracolum, and lumbosacral intvrt disc disorders	headache	0.420832	0.0485274	1.66796	0.303565	0.847007	Both
F41	Other anxiety disorders	M51	Thoracic, thoracolum, and lumbosacral intvrt disc disorders	cognitive	0.617313	0.227574	1.44234	0.352451	0.88066	Both
F41	Other anxiety disorders	M51	Thoracic, thoracolum, and lumbosacral intvrt disc disorders	renal	0	0	9.14512	1	1	Both
F41	Other anxiety disorders	M51	Thoracic, thoracolum, and lumbosacral intvrt disc disorders	loss_taste_smell	0.578263	0.174572	1.50925	0.312366	0.847007	Both
F41	Other anxiety disorders	K21	Gastro-esophageal reflux disease	dry_eyes_mouth	1.61528	0.622316	3.74107	0.23869	0.802316	Both
F41	Other anxiety disorders	K21	Gastro-esophageal reflux disease	tingling_sensation	2.89659	0.843905	7.96101	0.0449126	0.585809	Both
F41	Other anxiety disorders	K21	Gastro-esophageal reflux disease	dermatological	1.28302	0.427549	3.22226	0.617749	1	Both
F41	Other anxiety disorders	K21	Gastro-esophageal reflux disease	fever	4.13582	0.0894159	33.6957	0.242557	0.802316	Both
F41	Other anxiety disorders	K21	Gastro-esophageal reflux disease	psychological	1.92321	0.857181	4.10549	0.0923099	0.706607	Both
F41	Other anxiety disorders	K21	Gastro-esophageal reflux disease	abdominal_pain	5.70855	1.01576	21.4454	0.0240457	0.48995	Both
F41	Other anxiety disorders	K21	Gastro-esophageal reflux disease	tiredness	1.61965	0.773782	3.37702	0.159644	0.731673	Both
F41	Other anxiety disorders	K21	Gastro-esophageal reflux disease	digestive	3.42788	0.992549	9.50963	0.0256728	0.505521	Both
F41	Other anxiety disorders	K21	Gastro-esophageal reflux disease	menstrual_disturbances	0.474899	0.0114854	2.94047	0.716457	1	Both
F41	Other anxiety disorders	K21	Gastro-esophageal reflux disease	chills	3.74923	0.909337	11.5294	0.0333202	0.57296	Both
F41	Other anxiety disorders	K21	Gastro-esophageal reflux disease	endocrin	4.78996	1.14567	15.0608	0.0163827	0.479996	Both
F41	Other anxiety disorders	K21	Gastro-esophageal reflux disease	cardiovascular	1.45378	0.363852	4.26157	0.52439	0.995782	Both
F41	Other anxiety disorders	K21	Gastro-esophageal reflux disease	hematological	0	0	10.5574	1	1	Both
F41	Other anxiety disorders	K21	Gastro-esophageal reflux disease	respiratory_problems	1.96943	0.923728	4.11317	0.0558982	0.607462	Both
F41	Other anxiety disorders	K21	Gastro-esophageal reflux disease	muscular	1.1183	0.525902	2.32905	0.730097	1	Both
F41	Other anxiety disorders	K21	Gastro-esophageal reflux disease	headache	1.73212	0.574569	4.37715	0.261493	0.812729	Both
F41	Other anxiety disorders	K21	Gastro-esophageal reflux disease	cognitive	1.56867	0.700426	3.34188	0.234784	0.802316	Both
F41	Other anxiety disorders	K21	Gastro-esophageal reflux disease	renal	2.62446	0.0593386	19.0306	0.341336	0.873918	Both
F41	Other anxiety disorders	K21	Gastro-esophageal reflux disease	loss_taste_smell	0.522309	0.132388	1.5023	0.2804	0.82776	Both
F41	Other anxiety disorders	G43	Migraine	dry_eyes_mouth	1.58551	0.650607	3.49767	0.264708	0.812729	Both
F41	Other anxiety disorders	G43	Migraine	tingling_sensation	2.4704	0.726379	6.69587	0.0731278	0.663179	Both
F41	Other anxiety disorders	G43	Migraine	dermatological	1.31879	0.482604	3.11127	0.486955	0.964118	Both
F41	Other anxiety disorders	G43	Migraine	fever	0	0	14.8805	1	1	Both
F41	Other anxiety disorders	G43	Migraine	psychological	1.99593	0.945532	4.04756	0.0493416	0.585809	Both
F41	Other anxiety disorders	G43	Migraine	abdominal_pain	1.38267	0.0323785	9.21797	0.532392	0.997825	Both
F41	Other anxiety disorders	G43	Migraine	tiredness	2.6297	1.32038	5.37222	0.00397357	0.261644	Both
F41	Other anxiety disorders	G43	Migraine	digestive	4.54288	1.60588	11.2335	0.00255039	0.261644	Both
F41	Other anxiety disorders	G43	Migraine	menstrual_disturbances	2.4704	0.726379	6.69587	0.0731278	0.663179	Both
F41	Other anxiety disorders	G43	Migraine	chills	2.2749	0.427741	7.76612	0.170251	0.731673	Both
F41	Other anxiety disorders	G43	Migraine	endocrin	2.88413	0.536054	10.0464	0.106941	0.727882	Both
F41	Other anxiety disorders	G43	Migraine	cardiovascular	1.62229	0.482669	4.32243	0.370484	0.88066	Both
F41	Other anxiety disorders	G43	Migraine	hematological	0	0	9.14512	1	1	Both
F41	Other anxiety disorders	G43	Migraine	respiratory_problems	1.24359	0.580227	2.53727	0.590311	1	Both
F41	Other anxiety disorders	G43	Migraine	muscular	1.50949	0.759885	2.99885	0.249281	0.802316	Both
F41	Other anxiety disorders	G43	Migraine	headache	3.32919	1.45486	7.12013	0.00234115	0.261644	Both
F41	Other anxiety disorders	G43	Migraine	cognitive	1.82078	0.877382	3.65839	0.0926484	0.706607	Both
F41	Other anxiety disorders	G43	Migraine	renal	5.13522	0.52947	25.358	0.0760373	0.6641	Both
F41	Other anxiety disorders	G43	Migraine	loss_taste_smell	0.446991	0.114219	1.26859	0.153901	0.731673	Both
E66	Overweight and obesity	F32	Major depressive disorder, single episode	dry_eyes_mouth	0.635715	0.121415	2.1214	0.603908	1	Both
E66	Overweight and obesity	F32	Major depressive disorder, single episode	tingling_sensation	0	0	2.31961	0.400332	0.88066	Both
E66	Overweight and obesity	F32	Major depressive disorder, single episode	dermatological	2.10028	0.739825	5.25154	0.0973224	0.712163	Both
E66	Overweight and obesity	F32	Major depressive disorder, single episode	fever	0	0	21.8339	1	1	Both
E66	Overweight and obesity	F32	Major depressive disorder, single episode	psychological	0.776439	0.227891	2.12077	0.816636	1	Both
E66	Overweight and obesity	F32	Major depressive disorder, single episode	abdominal_pain	0	0	7.98018	1	1	Both
E66	Overweight and obesity	F32	Major depressive disorder, single episode	tiredness	1.27326	0.543353	2.90453	0.555598	1	Both
E66	Overweight and obesity	F32	Major depressive disorder, single episode	digestive	2.37948	0.444465	8.22428	0.157453	0.731673	Both
E66	Overweight and obesity	F32	Major depressive disorder, single episode	menstrual_disturbances	0.602384	0.0144646	3.7927	1	1	Both
E66	Overweight and obesity	F32	Major depressive disorder, single episode	chills	0.992805	0.0236014	6.38665	1	1	Both
E66	Overweight and obesity	F32	Major depressive disorder, single episode	endocrin	1.24109	0.0293218	8.09544	0.568159	1	Both
E66	Overweight and obesity	F32	Major depressive disorder, single episode	cardiovascular	0.850896	0.0962206	3.50062	1	1	Both
E66	Overweight and obesity	F32	Major depressive disorder, single episode	hematological	0	0	13.4353	1	1	Both
E66	Overweight and obesity	F32	Major depressive disorder, single episode	respiratory_problems	1.43713	0.585046	3.33107	0.39463	0.88066	Both
E66	Overweight and obesity	F32	Major depressive disorder, single episode	muscular	2.74724	1.18794	6.73474	0.0106192	0.425949	Both
E66	Overweight and obesity	F32	Major depressive disorder, single episode	headache	0.623318	0.0707496	2.54754	0.759844	1	Both
E66	Overweight and obesity	F32	Major depressive disorder, single episode	cognitive	0.985517	0.349672	2.44232	1	1	Both
E66	Overweight and obesity	F32	Major depressive disorder, single episode	renal	0	0	13.4353	1	1	Both
E66	Overweight and obesity	F32	Major depressive disorder, single episode	loss_taste_smell	0.680436	0.169677	2.01276	0.631152	1	Both
E78	Disorders of lipoprotein metabolism and other lipidemias	E55	Vitamin D deficiency	dry_eyes_mouth	2.59419	0.95162	6.47646	0.0444101	0.585809	Both
E78	Disorders of lipoprotein metabolism and other lipidemias	E55	Vitamin D deficiency	tingling_sensation	0	0	2.62644	0.39289	0.88066	Both
E78	Disorders of lipoprotein metabolism and other lipidemias	E55	Vitamin D deficiency	dermatological	1.55498	0.448633	4.36277	0.378808	0.88066	Both
E78	Disorders of lipoprotein metabolism and other lipidemias	E55	Vitamin D deficiency	fever	5.90974	0.126466	49.1029	0.179174	0.74633	Both
E78	Disorders of lipoprotein metabolism and other lipidemias	E55	Vitamin D deficiency	psychological	1.40988	0.491209	3.59428	0.462142	0.931491	Both
E78	Disorders of lipoprotein metabolism and other lipidemias	E55	Vitamin D deficiency	abdominal_pain	2.27964	0.0526153	15.6772	0.375936	0.88066	Both
E78	Disorders of lipoprotein metabolism and other lipidemias	E55	Vitamin D deficiency	tiredness	1.33445	0.542139	3.20146	0.531681	0.997825	Both
E78	Disorders of lipoprotein metabolism and other lipidemias	E55	Vitamin D deficiency	digestive	1.69367	0.188284	7.18829	0.35444	0.88066	Both
E78	Disorders of lipoprotein metabolism and other lipidemias	E55	Vitamin D deficiency	menstrual_disturbances	1.44408	0.161105	6.0902	0.650071	1	Both
E78	Disorders of lipoprotein metabolism and other lipidemias	E55	Vitamin D deficiency	chills	2.40439	0.264592	10.3917	0.225748	0.802316	Both
E78	Disorders of lipoprotein metabolism and other lipidemias	E55	Vitamin D deficiency	endocrin	0	0	5.47247	1	1	Both
E78	Disorders of lipoprotein metabolism and other lipidemias	E55	Vitamin D deficiency	cardiovascular	0.964935	0.108419	4.02005	1	1	Both
E78	Disorders of lipoprotein metabolism and other lipidemias	E55	Vitamin D deficiency	hematological	0	0	15.1924	1	1	Both
E78	Disorders of lipoprotein metabolism and other lipidemias	E55	Vitamin D deficiency	respiratory_problems	0.804711	0.260301	2.1234	0.82247	1	Both
E78	Disorders of lipoprotein metabolism and other lipidemias	E55	Vitamin D deficiency	muscular	1.17156	0.476108	2.80963	0.685882	1	Both
E78	Disorders of lipoprotein metabolism and other lipidemias	E55	Vitamin D deficiency	headache	1.11953	0.211117	3.81848	0.747308	1	Both
E78	Disorders of lipoprotein metabolism and other lipidemias	E55	Vitamin D deficiency	cognitive	0.932512	0.301418	2.46274	1	1	Both
E78	Disorders of lipoprotein metabolism and other lipidemias	E55	Vitamin D deficiency	renal	0	0	15.1924	1	1	Both
E78	Disorders of lipoprotein metabolism and other lipidemias	E55	Vitamin D deficiency	loss_taste_smell	1.03058	0.298485	2.87667	1	1	Both
E66	Overweight and obesity	G56	Mononeuropathies of upper limb	dry_eyes_mouth	1.81807	0.641622	4.53561	0.185948	0.75424	Both
E66	Overweight and obesity	G56	Mononeuropathies of upper limb	tingling_sensation	2.02314	0.379615	6.94187	0.213224	0.795948	Both
E66	Overweight and obesity	G56	Mononeuropathies of upper limb	dermatological	1.70448	0.555286	4.43567	0.265087	0.812729	Both
E66	Overweight and obesity	G56	Mononeuropathies of upper limb	fever	0	0	21.8339	1	1	Both
E66	Overweight and obesity	G56	Mononeuropathies of upper limb	psychological	2.04148	0.828987	4.74592	0.0998223	0.725554	Both
E66	Overweight and obesity	G56	Mononeuropathies of upper limb	abdominal_pain	4.43942	0.47368	20.3384	0.0918223	0.706607	Both
E66	Overweight and obesity	G56	Mononeuropathies of upper limb	tiredness	0.935412	0.381519	2.16393	1	1	Both
E66	Overweight and obesity	G56	Mononeuropathies of upper limb	digestive	0.704636	0.0168726	4.46136	1	1	Both
E66	Overweight and obesity	G56	Mononeuropathies of upper limb	menstrual_disturbances	0	0	2.31961	0.400332	0.88066	Both
E66	Overweight and obesity	G56	Mononeuropathies of upper limb	chills	0.992805	0.0236014	6.38665	1	1	Both
E66	Overweight and obesity	G56	Mononeuropathies of upper limb	endocrin	1.24109	0.0293218	8.09544	0.568159	1	Both
E66	Overweight and obesity	G56	Mononeuropathies of upper limb	cardiovascular	0.404571	0.00976384	2.51978	0.722716	1	Both
E66	Overweight and obesity	G56	Mononeuropathies of upper limb	hematological	0	0	13.4353	1	1	Both
E66	Overweight and obesity	G56	Mononeuropathies of upper limb	respiratory_problems	1.43713	0.585046	3.33107	0.39463	0.88066	Both
E66	Overweight and obesity	G56	Mononeuropathies of upper limb	muscular	1.73987	0.7631	4.01982	0.171887	0.733593	Both
E66	Overweight and obesity	G56	Mononeuropathies of upper limb	headache	0.297187	0.00719265	1.84024	0.351928	0.88066	Both
E66	Overweight and obesity	G56	Mononeuropathies of upper limb	cognitive	1.41488	0.556284	3.33228	0.38353	0.88066	Both
E66	Overweight and obesity	G56	Mononeuropathies of upper limb	renal	0	0	13.4353	1	1	Both
E66	Overweight and obesity	G56	Mononeuropathies of upper limb	loss_taste_smell	0.680436	0.169677	2.01276	0.631152	1	Both
J45	Asthma	J30	Vasomotor and allergic rhinitis	dry_eyes_mouth	0.929046	0.230425	2.77154	1	1	Both
J45	Asthma	J30	Vasomotor and allergic rhinitis	tingling_sensation	0.626204	0.0150163	3.95509	1	1	Both
J45	Asthma	J30	Vasomotor and allergic rhinitis	dermatological	0.763481	0.145295	2.56439	1	1	Both
J45	Asthma	J30	Vasomotor and allergic rhinitis	fever	5.4459	0.11686	44.9844	0.192209	0.758391	Both
J45	Asthma	J30	Vasomotor and allergic rhinitis	psychological	1.0275	0.335056	2.67404	1	1	Both
J45	Asthma	J30	Vasomotor and allergic rhinitis	abdominal_pain	0	0	8.30207	1	1	Both
J45	Asthma	J30	Vasomotor and allergic rhinitis	tiredness	1.36019	0.574603	3.15068	0.427478	0.905986	Both
J45	Asthma	J30	Vasomotor and allergic rhinitis	digestive	4.70941	1.33302	13.542	0.00863272	0.406488	Both
J45	Asthma	J30	Vasomotor and allergic rhinitis	menstrual_disturbances	0.626204	0.0150163	3.95509	1	1	Both
J45	Asthma	J30	Vasomotor and allergic rhinitis	chills	0	0	4.00628	0.620192	1	Both
J45	Asthma	J30	Vasomotor and allergic rhinitis	endocrin	1.29009	0.0304396	8.44038	0.554831	1	Both
J45	Asthma	J30	Vasomotor and allergic rhinitis	cardiovascular	0.885872	0.0999784	3.65845	1	1	Both
J45	Asthma	J30	Vasomotor and allergic rhinitis	hematological	3.4574	0.077554	25.4715	0.274442	0.824258	Both
J45	Asthma	J30	Vasomotor and allergic rhinitis	respiratory_problems	1.78928	0.740959	4.16428	0.190484	0.758391	Both
J45	Asthma	J30	Vasomotor and allergic rhinitis	muscular	0.870848	0.352549	2.03769	0.843406	1	Both
J45	Asthma	J30	Vasomotor and allergic rhinitis	headache	1.43903	0.355098	4.32427	0.525015	0.995782	Both
J45	Asthma	J30	Vasomotor and allergic rhinitis	cognitive	0.666037	0.194987	1.82752	0.506143	0.974258	Both
J45	Asthma	J30	Vasomotor and allergic rhinitis	renal	0	0	13.9752	1	1	Both
J45	Asthma	J30	Vasomotor and allergic rhinitis	loss_taste_smell	1.18226	0.385149	3.08102	0.805059	1	Both
F43	Reaction to severe stress, and adjustment disorders	F41	Other anxiety disorders	dry_eyes_mouth	2.01397	0.703232	5.10879	0.165277	0.731673	Both
F43	Reaction to severe stress, and adjustment disorders	F41	Other anxiety disorders	tingling_sensation	2.20334	0.411265	7.62936	0.183061	0.752436	Both
F43	Reaction to severe stress, and adjustment disorders	F41	Other anxiety disorders	dermatological	1.12061	0.276601	3.36933	0.775637	1	Both
F43	Reaction to severe stress, and adjustment disorders	F41	Other anxiety disorders	fever	5.6692	0.121478	46.9302	0.185715	0.75424	Both
F43	Reaction to severe stress, and adjustment disorders	F41	Other anxiety disorders	psychological	1.61849	0.600432	3.97698	0.332826	0.870653	Both
F43	Reaction to severe stress, and adjustment disorders	F41	Other anxiety disorders	abdominal_pain	0	0	8.65019	1	1	Both
F43	Reaction to severe stress, and adjustment disorders	F41	Other anxiety disorders	tiredness	1.7098	0.721742	4.05097	0.216997	0.795948	Both
F43	Reaction to severe stress, and adjustment disorders	F41	Other anxiety disorders	digestive	2.59139	0.481523	9.03804	0.133765	0.731673	Both
F43	Reaction to severe stress, and adjustment disorders	F41	Other anxiety disorders	menstrual_disturbances	0.651928	0.0156106	4.13184	1	1	Both
F43	Reaction to severe stress, and adjustment disorders	F41	Other anxiety disorders	chills	2.30188	0.2539	9.90829	0.239314	0.802316	Both
F43	Reaction to severe stress, and adjustment disorders	F41	Other anxiety disorders	endocrin	0	0	5.24252	1	1	Both
F43	Reaction to severe stress, and adjustment disorders	F41	Other anxiety disorders	cardiovascular	0.923759	0.104032	3.83108	1	1	Both
F43	Reaction to severe stress, and adjustment disorders	F41	Other anxiety disorders	hematological	0	0	14.559	1	1	Both
F43	Reaction to severe stress, and adjustment disorders	F41	Other anxiety disorders	respiratory_problems	2.24454	0.935698	5.30144	0.0465263	0.585809	Both
F43	Reaction to severe stress, and adjustment disorders	F41	Other anxiety disorders	muscular	1.7577	0.745941	4.20723	0.160998	0.731673	Both
F43	Reaction to severe stress, and adjustment disorders	F41	Other anxiety disorders	headache	1.99209	0.574944	5.5788	0.191394	0.758391	Both
F43	Reaction to severe stress, and adjustment disorders	F41	Other anxiety disorders	cognitive	1.32413	0.491901	3.24803	0.497882	0.971526	Both
F43	Reaction to severe stress, and adjustment disorders	F41	Other anxiety disorders	renal	3.59864	0.0806195	26.6017	0.265657	0.812729	Both
F43	Reaction to severe stress, and adjustment disorders	F41	Other anxiety disorders	loss_taste_smell	0.744085	0.184313	2.22584	0.802581	1	Both
E66	Overweight and obesity	K21	Gastro-esophageal reflux disease	dry_eyes_mouth	1.71553	0.55185	4.55892	0.263371	0.812729	Both
E66	Overweight and obesity	K21	Gastro-esophageal reflux disease	tingling_sensation	1.44408	0.161105	6.0902	0.650071	1	Both
E66	Overweight and obesity	K21	Gastro-esophageal reflux disease	dermatological	1.17529	0.289016	3.55603	0.769098	1	Both
E66	Overweight and obesity	K21	Gastro-esophageal reflux disease	fever	0	0	24.6668	1	1	Both
E66	Overweight and obesity	K21	Gastro-esophageal reflux disease	psychological	3.44281	1.41339	8.31693	0.00491939	0.261644	Both
E66	Overweight and obesity	K21	Gastro-esophageal reflux disease	abdominal_pain	2.27964	0.0526153	15.6772	0.375936	0.88066	Both
E66	Overweight and obesity	K21	Gastro-esophageal reflux disease	tiredness	0.789526	0.291938	1.95282	0.678463	1	Both
E66	Overweight and obesity	K21	Gastro-esophageal reflux disease	digestive	1.69367	0.188284	7.18829	0.35444	0.88066	Both
E66	Overweight and obesity	K21	Gastro-esophageal reflux disease	menstrual_disturbances	0.679794	0.0162495	4.32378	1	1	Both
E66	Overweight and obesity	K21	Gastro-esophageal reflux disease	chills	0	0	4.35841	1	1	Both
E66	Overweight and obesity	K21	Gastro-esophageal reflux disease	endocrin	7.13282	1.66282	23.345	0.00485518	0.261644	Both
E66	Overweight and obesity	K21	Gastro-esophageal reflux disease	cardiovascular	0.964935	0.108419	4.02005	1	1	Both
E66	Overweight and obesity	K21	Gastro-esophageal reflux disease	hematological	0	0	15.1924	1	1	Both
E66	Overweight and obesity	K21	Gastro-esophageal reflux disease	respiratory_problems	1.4539	0.559414	3.5419	0.372716	0.88066	Both
E66	Overweight and obesity	K21	Gastro-esophageal reflux disease	muscular	1.38185	0.569976	3.32209	0.418418	0.893781	Both
E66	Overweight and obesity	K21	Gastro-esophageal reflux disease	headache	1.57941	0.386973	4.80324	0.339603	0.873918	Both
E66	Overweight and obesity	K21	Gastro-esophageal reflux disease	cognitive	2.38003	0.964253	5.72745	0.0363299	0.585809	Both
E66	Overweight and obesity	K21	Gastro-esophageal reflux disease	renal	0	0	15.1924	1	1	Both
E66	Overweight and obesity	K21	Gastro-esophageal reflux disease	loss_taste_smell	1.03058	0.298485	2.87667	1	1	Both
I10	Essential (primary) hypertension	K21	Gastro-esophageal reflux disease	dry_eyes_mouth	2.3409	0.725925	6.60638	0.111033	0.729007	Both
I10	Essential (primary) hypertension	K21	Gastro-esophageal reflux disease	tingling_sensation	1.8544	0.203791	8.0571	0.319876	0.847007	Both
I10	Essential (primary) hypertension	K21	Gastro-esophageal reflux disease	dermatological	2.08446	0.583293	6.15604	0.182823	0.752436	Both
I10	Essential (primary) hypertension	K21	Gastro-esophageal reflux disease	fever	7.49386	0.158893	63.2852	0.145778	0.731673	Both
I10	Essential (primary) hypertension	K21	Gastro-esophageal reflux disease	psychological	1.96384	0.654991	5.37321	0.169288	0.731673	Both
I10	Essential (primary) hypertension	K21	Gastro-esophageal reflux disease	abdominal_pain	2.89263	0.0661105	20.3336	0.313577	0.847007	Both
I10	Essential (primary) hypertension	K21	Gastro-esophageal reflux disease	tiredness	0.906578	0.303427	2.47069	1	1	Both
I10	Essential (primary) hypertension	K21	Gastro-esophageal reflux disease	digestive	2.17453	0.238146	9.50714	0.260633	0.812729	Both
I10	Essential (primary) hypertension	K21	Gastro-esophageal reflux disease	menstrual_disturbances	0.863088	0.0204217	5.62454	1	1	Both
I10	Essential (primary) hypertension	K21	Gastro-esophageal reflux disease	chills	3.08637	0.334614	13.7335	0.159495	0.731673	Both
I10	Essential (primary) hypertension	K21	Gastro-esophageal reflux disease	endocrin	6.39087	1.13361	24.1024	0.0182458	0.479996	Both
I10	Essential (primary) hypertension	K21	Gastro-esophageal reflux disease	cardiovascular	1.23934	0.137168	5.32237	0.677802	1	Both
I10	Essential (primary) hypertension	K21	Gastro-esophageal reflux disease	hematological	0	0	19.3824	1	1	Both
I10	Essential (primary) hypertension	K21	Gastro-esophageal reflux disease	respiratory_problems	1.72612	0.605238	4.64872	0.312977	0.847007	Both
I10	Essential (primary) hypertension	K21	Gastro-esophageal reflux disease	muscular	1.83671	0.685012	5.06371	0.248767	0.802316	Both
I10	Essential (primary) hypertension	K21	Gastro-esophageal reflux disease	headache	4.62448	1.52684	12.8028	0.00349808	0.261644	Both
I10	Essential (primary) hypertension	K21	Gastro-esophageal reflux disease	cognitive	0.735568	0.177334	2.30831	0.795768	1	Both
I10	Essential (primary) hypertension	K21	Gastro-esophageal reflux disease	renal	0	0	19.3824	1	1	Both
I10	Essential (primary) hypertension	K21	Gastro-esophageal reflux disease	loss_taste_smell	0.452545	0.0505193	1.91528	0.396906	0.88066	Both
J30	Vasomotor and allergic rhinitis	J45	Asthma	dry_eyes_mouth	0.20109	0.00487422	1.24233	0.105625	0.727882	Both
J30	Vasomotor and allergic rhinitis	J45	Asthma	tingling_sensation	0	0	2.41382	0.396811	0.88066	Both
J30	Vasomotor and allergic rhinitis	J45	Asthma	dermatological	0.763481	0.145295	2.56439	1	1	Both
J30	Vasomotor and allergic rhinitis	J45	Asthma	fever	0	0	22.7029	1	1	Both
J30	Vasomotor and allergic rhinitis	J45	Asthma	psychological	0.812736	0.237661	2.23355	0.815867	1	Both
J30	Vasomotor and allergic rhinitis	J45	Asthma	abdominal_pain	0	0	8.30207	1	1	Both
J30	Vasomotor and allergic rhinitis	J45	Asthma	tiredness	0.704229	0.264005	1.70501	0.545662	1	Both
J30	Vasomotor and allergic rhinitis	J45	Asthma	digestive	1.55509	0.173632	6.54472	0.391021	0.88066	Both
J30	Vasomotor and allergic rhinitis	J45	Asthma	menstrual_disturbances	1.3259	0.148622	5.5432	0.6645	1	Both
J30	Vasomotor and allergic rhinitis	J45	Asthma	chills	1.03203	0.0245013	6.65908	1	1	Both
J30	Vasomotor and allergic rhinitis	J45	Asthma	endocrin	0	0	5.03069	1	1	Both
J30	Vasomotor and allergic rhinitis	J45	Asthma	cardiovascular	0.885872	0.0999784	3.65845	1	1	Both
J30	Vasomotor and allergic rhinitis	J45	Asthma	hematological	3.4574	0.077554	25.4715	0.274442	0.824258	Both
J30	Vasomotor and allergic rhinitis	J45	Asthma	respiratory_problems	0.574856	0.168388	1.57595	0.384706	0.88066	Both
J30	Vasomotor and allergic rhinitis	J45	Asthma	muscular	0.737249	0.288769	1.74855	0.552934	1	Both
J30	Vasomotor and allergic rhinitis	J45	Asthma	headache	1.02406	0.194227	3.45651	1	1	Both
J30	Vasomotor and allergic rhinitis	J45	Asthma	cognitive	1.03613	0.365714	2.58849	1	1	Both
J30	Vasomotor and allergic rhinitis	J45	Asthma	renal	0	0	13.9752	1	1	Both
J30	Vasomotor and allergic rhinitis	J45	Asthma	loss_taste_smell	0.50786	0.0969235	1.6977	0.33238	0.870653	Both
F32	Major depressive disorder, single episode	F43	Reaction to severe stress, and adjustment disorders	dry_eyes_mouth	1.71553	0.55185	4.55892	0.263371	0.812729	Both
F32	Major depressive disorder, single episode	F43	Reaction to severe stress, and adjustment disorders	tingling_sensation	2.30577	0.429097	8.02773	0.16846	0.731673	Both
F32	Major depressive disorder, single episode	F43	Reaction to severe stress, and adjustment disorders	dermatological	1.55498	0.448633	4.36277	0.378808	0.88066	Both
F32	Major depressive disorder, single episode	F43	Reaction to severe stress, and adjustment disorders	fever	5.90974	0.126466	49.1029	0.179174	0.74633	Both
F32	Major depressive disorder, single episode	F43	Reaction to severe stress, and adjustment disorders	psychological	3.44281	1.41339	8.31693	0.00491939	0.261644	Both
F32	Major depressive disorder, single episode	F43	Reaction to severe stress, and adjustment disorders	abdominal_pain	0	0	9.02883	1	1	Both
F32	Major depressive disorder, single episode	F43	Reaction to severe stress, and adjustment disorders	tiredness	2.58987	1.07571	6.51693	0.0210507	0.48995	Both
F32	Major depressive disorder, single episode	F43	Reaction to severe stress, and adjustment disorders	digestive	2.71187	0.5024	9.51022	0.122442	0.731673	Both
F32	Major depressive disorder, single episode	F43	Reaction to severe stress, and adjustment disorders	menstrual_disturbances	0.679794	0.0162495	4.32378	1	1	Both
F32	Major depressive disorder, single episode	F43	Reaction to severe stress, and adjustment disorders	chills	3.88108	0.709771	13.8936	0.0570797	0.607462	Both
F32	Major depressive disorder, single episode	F43	Reaction to severe stress, and adjustment disorders	endocrin	3.0256	0.330014	13.2918	0.163102	0.731673	Both
F32	Major depressive disorder, single episode	F43	Reaction to severe stress, and adjustment disorders	cardiovascular	3.68965	1.17183	9.96777	0.0130989	0.479996	Both
F32	Major depressive disorder, single episode	F43	Reaction to severe stress, and adjustment disorders	hematological	3.75238	0.0839303	27.8081	0.256774	0.812729	Both
F32	Major depressive disorder, single episode	F43	Reaction to severe stress, and adjustment disorders	respiratory_problems	2.05035	0.831445	4.92848	0.111473	0.729007	Both
F32	Major depressive disorder, single episode	F43	Reaction to severe stress, and adjustment disorders	muscular	2.27259	0.944235	5.71801	0.0609587	0.633921	Both
F32	Major depressive disorder, single episode	F43	Reaction to severe stress, and adjustment disorders	headache	1.57941	0.386973	4.80324	0.339603	0.873918	Both
F32	Major depressive disorder, single episode	F43	Reaction to severe stress, and adjustment disorders	cognitive	1.15418	0.402641	2.93754	0.815788	1	Both
F32	Major depressive disorder, single episode	F43	Reaction to severe stress, and adjustment disorders	renal	0	0	15.1924	1	1	Both
F32	Major depressive disorder, single episode	F43	Reaction to severe stress, and adjustment disorders	loss_taste_smell	1.03058	0.298485	2.87667	1	1	Both
I10	Essential (primary) hypertension	G47	Sleep disorders	dry_eyes_mouth	0.710212	0.0780722	3.10055	1	1	Both
I10	Essential (primary) hypertension	G47	Sleep disorders	tingling_sensation	1.028	0.024104	6.84698	1	1	Both
I10	Essential (primary) hypertension	G47	Sleep disorders	dermatological	1.32331	0.240817	4.82649	0.720602	1	Both
I10	Essential (primary) hypertension	G47	Sleep disorders	fever	8.9138	0.187511	76.4373	0.125174	0.731673	Both
I10	Essential (primary) hypertension	G47	Sleep disorders	psychological	0.767156	0.14015	2.783	1	1	Both
I10	Essential (primary) hypertension	G47	Sleep disorders	abdominal_pain	7.76177	0.80078	37.8248	0.0372583	0.585809	Both
I10	Essential (primary) hypertension	G47	Sleep disorders	tiredness	1.91789	0.650609	5.76542	0.208089	0.787974	Both
I10	Essential (primary) hypertension	G47	Sleep disorders	digestive	0	0	4.72204	1	1	Both
I10	Essential (primary) hypertension	G47	Sleep disorders	menstrual_disturbances	0	0	4.0308	0.617809	1	Both
I10	Essential (primary) hypertension	G47	Sleep disorders	chills	1.69333	0.0393272	11.5045	0.466084	0.934758	Both
I10	Essential (primary) hypertension	G47	Sleep disorders	endocrin	0	0	8.38244	1	1	Both
I10	Essential (primary) hypertension	G47	Sleep disorders	cardiovascular	0.690712	0.016274	4.55467	1	1	Both
I10	Essential (primary) hypertension	G47	Sleep disorders	hematological	13.2415	1.30309	70.5353	0.0153925	0.479996	Both
I10	Essential (primary) hypertension	G47	Sleep disorders	respiratory_problems	0.544234	0.0995398	1.97046	0.423782	0.901682	Both
I10	Essential (primary) hypertension	G47	Sleep disorders	muscular	2.76768	0.929436	9.1891	0.046411	0.585809	Both
I10	Essential (primary) hypertension	G47	Sleep disorders	headache	0	0	1.98036	0.242507	0.802316	Both
I10	Essential (primary) hypertension	G47	Sleep disorders	cognitive	0.908737	0.213927	2.97591	1	1	Both
I10	Essential (primary) hypertension	G47	Sleep disorders	renal	5.66441	0.124448	43.563	0.182081	0.752436	Both
I10	Essential (primary) hypertension	G47	Sleep disorders	loss_taste_smell	0.881057	0.160798	3.19983	1	1	Both
E78	Disorders of lipoprotein metabolism and other lipidemias	M47	Spondylosis	dry_eyes_mouth	2.96246	0.984388	8.14145	0.0267146	0.51664	Both
E78	Disorders of lipoprotein metabolism and other lipidemias	M47	Spondylosis	tingling_sensation	1.8544	0.203791	8.0571	0.319876	0.847007	Both
E78	Disorders of lipoprotein metabolism and other lipidemias	M47	Spondylosis	dermatological	0.31897	0.00762183	2.03806	0.341022	0.873918	Both
E78	Disorders of lipoprotein metabolism and other lipidemias	M47	Spondylosis	fever	7.49386	0.158893	63.2852	0.145778	0.731673	Both
E78	Disorders of lipoprotein metabolism and other lipidemias	M47	Spondylosis	psychological	3.70897	1.36584	10.072	0.00458517	0.261644	Both
E78	Disorders of lipoprotein metabolism and other lipidemias	M47	Spondylosis	abdominal_pain	0	0	11.5328	1	1	Both
E78	Disorders of lipoprotein metabolism and other lipidemias	M47	Spondylosis	tiredness	0.906578	0.303427	2.47069	1	1	Both
E78	Disorders of lipoprotein metabolism and other lipidemias	M47	Spondylosis	digestive	3.52558	0.64036	12.8095	0.0720785	0.663179	Both
E78	Disorders of lipoprotein metabolism and other lipidemias	M47	Spondylosis	menstrual_disturbances	0.863088	0.0204217	5.62454	1	1	Both
E78	Disorders of lipoprotein metabolism and other lipidemias	M47	Spondylosis	chills	3.08637	0.334614	13.7335	0.159495	0.731673	Both
E78	Disorders of lipoprotein metabolism and other lipidemias	M47	Spondylosis	endocrin	1.77728	0.0413957	11.9767	0.449746	0.925999	Both
E78	Disorders of lipoprotein metabolism and other lipidemias	M47	Spondylosis	cardiovascular	1.99324	0.366728	7.10114	0.224828	0.802316	Both
E78	Disorders of lipoprotein metabolism and other lipidemias	M47	Spondylosis	hematological	0	0	19.3824	1	1	Both
E78	Disorders of lipoprotein metabolism and other lipidemias	M47	Spondylosis	respiratory_problems	1.38769	0.463786	3.78831	0.46098	0.931491	Both
E78	Disorders of lipoprotein metabolism and other lipidemias	M47	Spondylosis	muscular	0.796619	0.266737	2.17026	0.818568	1	Both
E78	Disorders of lipoprotein metabolism and other lipidemias	M47	Spondylosis	headache	0	0	1.65036	0.154469	0.731673	Both
E78	Disorders of lipoprotein metabolism and other lipidemias	M47	Spondylosis	cognitive	0.323669	0.0361824	1.36695	0.189874	0.758391	Both
E78	Disorders of lipoprotein metabolism and other lipidemias	M47	Spondylosis	renal	0	0	19.3824	1	1	Both
E78	Disorders of lipoprotein metabolism and other lipidemias	M47	Spondylosis	loss_taste_smell	0.452545	0.0505193	1.91528	0.396906	0.88066	Both
E66	Overweight and obesity	F39	Unspecified mood [affective] disorder	dry_eyes_mouth	1.00353	0.185253	3.56443	1	1	Both
E66	Overweight and obesity	F39	Unspecified mood [affective] disorder	tingling_sensation	0	0	3.55852	0.620428	1	Both
E66	Overweight and obesity	F39	Unspecified mood [affective] disorder	dermatological	1.15539	0.213042	4.11119	0.74041	1	Both
E66	Overweight and obesity	F39	Unspecified mood [affective] disorder	fever	0	0	33.2017	1	1	Both
E66	Overweight and obesity	F39	Unspecified mood [affective] disorder	psychological	0.417853	0.0464864	1.78169	0.397165	0.88066	Both
E66	Overweight and obesity	F39	Unspecified mood [affective] disorder	abdominal_pain	0	0	12.2057	1	1	Both
E66	Overweight and obesity	F39	Unspecified mood [affective] disorder	tiredness	1.23124	0.42586	3.39537	0.640536	1	Both
E66	Overweight and obesity	F39	Unspecified mood [affective] disorder	digestive	0	0	4.16901	0.61912	1	Both
E66	Overweight and obesity	F39	Unspecified mood [affective] disorder	menstrual_disturbances	1.96526	0.215116	8.60832	0.298079	0.840675	Both
E66	Overweight and obesity	F39	Unspecified mood [affective] disorder	chills	1.50235	0.0351127	10.0585	0.504431	0.974117	Both
E66	Overweight and obesity	F39	Unspecified mood [affective] disorder	endocrin	1.87781	0.0436202	12.732	0.432902	0.909961	Both
E66	Overweight and obesity	F39	Unspecified mood [affective] disorder	cardiovascular	0.612682	0.0145315	3.9778	1	1	Both
E66	Overweight and obesity	F39	Unspecified mood [affective] disorder	hematological	0	0	20.4967	1	1	Both
E66	Overweight and obesity	F39	Unspecified mood [affective] disorder	respiratory_problems	1.88558	0.651109	5.20767	0.197475	0.763804	Both
E66	Overweight and obesity	F39	Unspecified mood [affective] disorder	muscular	2.06955	0.750766	5.98293	0.155057	0.731673	Both
E66	Overweight and obesity	F39	Unspecified mood [affective] disorder	headache	0.9626	0.106483	4.14217	1	1	Both
E66	Overweight and obesity	F39	Unspecified mood [affective] disorder	cognitive	1.05737	0.295095	3.14542	1	1	Both
E66	Overweight and obesity	F39	Unspecified mood [affective] disorder	renal	0	0	20.4967	1	1	Both
E66	Overweight and obesity	F39	Unspecified mood [affective] disorder	loss_taste_smell	0.225201	0.00537743	1.44328	0.147156	0.731673	Both
F32	Major depressive disorder, single episode	F39	Unspecified mood [affective] disorder	dry_eyes_mouth	1.22169	0.57168	2.42951	0.591668	1	Women
F32	Major depressive disorder, single episode	F39	Unspecified mood [affective] disorder	tingling_sensation	1.64731	0.484648	4.46012	0.366023	0.88066	Women
F32	Major depressive disorder, single episode	F39	Unspecified mood [affective] disorder	dermatological	0.47767	0.145811	1.2239	0.135458	0.731673	Women
F32	Major depressive disorder, single episode	F39	Unspecified mood [affective] disorder	fever	0	0	12.6922	1	1	Women
F32	Major depressive disorder, single episode	F39	Unspecified mood [affective] disorder	psychological	0.855946	0.390543	1.72573	0.740504	1	Women
F32	Major depressive disorder, single episode	F39	Unspecified mood [affective] disorder	abdominal_pain	1.14977	0.0260554	8.33916	0.603756	1	Women
F32	Major depressive disorder, single episode	F39	Unspecified mood [affective] disorder	tiredness	1.79948	1.01715	3.18813	0.0352049	0.583794	Women
F32	Major depressive disorder, single episode	F39	Unspecified mood [affective] disorder	digestive	1.29445	0.322908	3.80992	0.552483	1	Women
F32	Major depressive disorder, single episode	F39	Unspecified mood [affective] disorder	menstrual_disturbances	0.822683	0.208741	2.35674	1	1	Women
F32	Major depressive disorder, single episode	F39	Unspecified mood [affective] disorder	chills	1.34074	0.251972	4.58701	0.49974	0.971526	Women
F32	Major depressive disorder, single episode	F39	Unspecified mood [affective] disorder	endocrin	0.954735	0.106709	4.01236	1	1	Women
F32	Major depressive disorder, single episode	F39	Unspecified mood [affective] disorder	cardiovascular	1.09005	0.326312	2.87402	0.801607	1	Women
F32	Major depressive disorder, single episode	F39	Unspecified mood [affective] disorder	hematological	1.64886	0.0360026	13.1966	0.489217	0.965067	Women
F32	Major depressive disorder, single episode	F39	Unspecified mood [affective] disorder	respiratory_problems	1.11741	0.580838	2.066	0.75927	1	Women
F32	Major depressive disorder, single episode	F39	Unspecified mood [affective] disorder	muscular	1.78505	1.01055	3.1744	0.0380865	0.585809	Women
F32	Major depressive disorder, single episode	F39	Unspecified mood [affective] disorder	headache	1.47994	0.642926	3.10572	0.302704	0.847007	Women
F32	Major depressive disorder, single episode	F39	Unspecified mood [affective] disorder	cognitive	1.63408	0.884974	2.94772	0.0899135	0.705626	Women
F32	Major depressive disorder, single episode	F39	Unspecified mood [affective] disorder	renal	3.86105	0.0725479	48.8942	0.284625	0.82776	Women
F32	Major depressive disorder, single episode	F39	Unspecified mood [affective] disorder	loss_taste_smell	0.72297	0.304842	1.53299	0.493709	0.970058	Women
F41	Other anxiety disorders	N92	Excessive, frequent and irregular menstruation	dry_eyes_mouth	0.639535	0.238779	1.46368	0.364326	0.88066	Women
F41	Other anxiety disorders	N92	Excessive, frequent and irregular menstruation	tingling_sensation	0.93721	0.179263	3.10947	1	1	Women
F41	Other anxiety disorders	N92	Excessive, frequent and irregular menstruation	dermatological	0.872938	0.347038	1.9285	0.850609	1	Women
F41	Other anxiety disorders	N92	Excessive, frequent and irregular menstruation	fever	0	0	13.1851	1	1	Women
F41	Other anxiety disorders	N92	Excessive, frequent and irregular menstruation	psychological	1.38679	0.693329	2.64216	0.309715	0.847007	Women
F41	Other anxiety disorders	N92	Excessive, frequent and irregular menstruation	abdominal_pain	1.19433	0.0270507	8.67143	0.590589	1	Women
F41	Other anxiety disorders	N92	Excessive, frequent and irregular menstruation	tiredness	1.22422	0.675793	2.18972	0.479218	0.955057	Women
F41	Other anxiety disorders	N92	Excessive, frequent and irregular menstruation	digestive	0	0	1.12102	0.0645987	0.634448	Women
F41	Other anxiety disorders	N92	Excessive, frequent and irregular menstruation	menstrual_disturbances	0.618397	0.119882	2.00655	0.611525	1	Women
F41	Other anxiety disorders	N92	Excessive, frequent and irregular menstruation	chills	0.415532	0.00998068	2.61421	0.718902	1	Women
F41	Other anxiety disorders	N92	Excessive, frequent and irregular menstruation	endocrin	1.58334	0.295051	5.49875	0.445039	0.921563	Women
F41	Other anxiety disorders	N92	Excessive, frequent and irregular menstruation	cardiovascular	0.404904	0.0466225	1.60787	0.303657	0.847007	Women
F41	Other anxiety disorders	N92	Excessive, frequent and irregular menstruation	hematological	0	0	7.08068	1	1	Women
F41	Other anxiety disorders	N92	Excessive, frequent and irregular menstruation	respiratory_problems	0.634181	0.289799	1.27633	0.214331	0.795948	Women
F41	Other anxiety disorders	N92	Excessive, frequent and irregular menstruation	muscular	1.04896	0.579517	1.8747	0.889067	1	Women
F41	Other anxiety disorders	N92	Excessive, frequent and irregular menstruation	headache	0.978379	0.362351	2.26423	1	1	Women
F41	Other anxiety disorders	N92	Excessive, frequent and irregular menstruation	cognitive	1.0129	0.508693	1.91949	1	1	Women
F41	Other anxiety disorders	N92	Excessive, frequent and irregular menstruation	renal	4.01094	0.0753167	50.9169	0.276115	0.824258	Women
F41	Other anxiety disorders	N92	Excessive, frequent and irregular menstruation	loss_taste_smell	0.75583	0.318009	1.60752	0.601649	1	Women
F41	Other anxiety disorders	F32	Major depressive disorder, single episode	dry_eyes_mouth	1.06304	0.441523	2.30184	0.846556	1	Women
F41	Other anxiety disorders	F32	Major depressive disorder, single episode	tingling_sensation	1.56043	0.387004	4.63366	0.342586	0.875049	Women
F41	Other anxiety disorders	F32	Major depressive disorder, single episode	dermatological	0.893651	0.329972	2.07854	1	1	Women
F41	Other anxiety disorders	F32	Major depressive disorder, single episode	fever	0	0	15.5611	1	1	Women
F41	Other anxiety disorders	F32	Major depressive disorder, single episode	psychological	1.92694	0.961138	3.7238	0.0450475	0.585809	Women
F41	Other anxiety disorders	F32	Major depressive disorder, single episode	abdominal_pain	1.40964	0.0318445	10.2869	0.533845	0.998539	Women
F41	Other anxiety disorders	F32	Major depressive disorder, single episode	tiredness	1.50709	0.803028	2.81267	0.172052	0.733593	Women
F41	Other anxiety disorders	F32	Major depressive disorder, single episode	digestive	1.60616	0.397821	4.77989	0.331207	0.870625	Women
F41	Other anxiety disorders	F32	Major depressive disorder, single episode	menstrual_disturbances	0.226201	0.00551458	1.37605	0.167868	0.731673	Women
F41	Other anxiety disorders	F32	Major depressive disorder, single episode	chills	1.04014	0.116377	4.35838	1	1	Women
F41	Other anxiety disorders	F32	Major depressive disorder, single episode	endocrin	1.88078	0.348735	6.58104	0.246663	0.802316	Women
F41	Other anxiety disorders	F32	Major depressive disorder, single episode	cardiovascular	2.07575	0.748648	4.98605	0.096527	0.712163	Women
F41	Other anxiety disorders	F32	Major depressive disorder, single episode	hematological	2.0212	0.0439988	16.2614	0.425296	0.903128	Women
F41	Other anxiety disorders	F32	Major depressive disorder, single episode	respiratory_problems	1.80934	0.937236	3.41725	0.0648184	0.634448	Women
F41	Other anxiety disorders	F32	Major depressive disorder, single episode	muscular	1.41167	0.754965	2.63489	0.292658	0.838488	Women
F41	Other anxiety disorders	F32	Major depressive disorder, single episode	headache	1.39998	0.547845	3.16142	0.374515	0.88066	Women
F41	Other anxiety disorders	F32	Major depressive disorder, single episode	cognitive	1.27077	0.627376	2.46418	0.500565	0.971526	Women
F41	Other anxiety disorders	F32	Major depressive disorder, single episode	renal	4.73081	0.0886525	60.2451	0.241314	0.802316	Women
F41	Other anxiety disorders	F32	Major depressive disorder, single episode	loss_taste_smell	0.252854	0.0495892	0.805019	0.0139338	0.479996	Women
E66	Overweight and obesity	F41	Other anxiety disorders	dry_eyes_mouth	0.604144	0.181917	1.58119	0.407767	0.888731	Women
E66	Overweight and obesity	F41	Other anxiety disorders	tingling_sensation	2.39748	0.694769	6.63653	0.0833244	0.688858	Women
E66	Overweight and obesity	F41	Other anxiety disorders	dermatological	1.05317	0.385365	2.48214	0.830735	1	Women
E66	Overweight and obesity	F41	Other anxiety disorders	fever	0	0	17.9495	1	1	Women
E66	Overweight and obesity	F41	Other anxiety disorders	psychological	1.69507	0.790003	3.45351	0.124975	0.731673	Women
E66	Overweight and obesity	F41	Other anxiety disorders	abdominal_pain	0	0	6.5585	1	1	Women
E66	Overweight and obesity	F41	Other anxiety disorders	tiredness	0.980868	0.483919	1.92858	1	1	Women
E66	Overweight and obesity	F41	Other anxiety disorders	digestive	1.86982	0.460362	5.61573	0.283707	0.82776	Women
E66	Overweight and obesity	F41	Other anxiety disorders	menstrual_disturbances	0.260964	0.00634361	1.59774	0.243494	0.802316	Women
E66	Overweight and obesity	F41	Other anxiety disorders	chills	1.20292	0.134089	5.07657	0.684079	1	Women
E66	Overweight and obesity	F41	Other anxiety disorders	endocrin	0.636542	0.0151421	4.09048	1	1	Women
E66	Overweight and obesity	F41	Other anxiety disorders	cardiovascular	0.870133	0.166857	2.8745	1	1	Women
E66	Overweight and obesity	F41	Other anxiety disorders	hematological	0	0	9.65418	1	1	Women
E66	Overweight and obesity	F41	Other anxiety disorders	respiratory_problems	1.06286	0.486363	2.18282	0.859941	1	Women
E66	Overweight and obesity	F41	Other anxiety disorders	muscular	1.88402	0.968522	3.71307	0.0543397	0.6067	Women
E66	Overweight and obesity	F41	Other anxiety disorders	headache	0.705427	0.178789	2.026	0.6397	1	Women
E66	Overweight and obesity	F41	Other anxiety disorders	cognitive	0.851002	0.366483	1.81191	0.724347	1	Women
E66	Overweight and obesity	F41	Other anxiety disorders	renal	0	0	24.8826	1	1	Women
E66	Overweight and obesity	F41	Other anxiety disorders	loss_taste_smell	1.094	0.450393	2.3997	0.842955	1	Women
I10	Essential (primary) hypertension	E78	Disorders of lipoprotein metabolism and other lipidemias	dry_eyes_mouth	1.47655	0.563806	3.46126	0.355403	0.88066	Women
I10	Essential (primary) hypertension	E78	Disorders of lipoprotein metabolism and other lipidemias	tingling_sensation	0.50188	0.0120345	3.16675	1	1	Women
I10	Essential (primary) hypertension	E78	Disorders of lipoprotein metabolism and other lipidemias	dermatological	0.710209	0.178296	2.07313	0.635886	1	Women
I10	Essential (primary) hypertension	E78	Disorders of lipoprotein metabolism and other lipidemias	fever	0	0	23.1497	1	1	Women
I10	Essential (primary) hypertension	E78	Disorders of lipoprotein metabolism and other lipidemias	psychological	1.38223	0.555186	3.1441	0.393359	0.88066	Women
I10	Essential (primary) hypertension	E78	Disorders of lipoprotein metabolism and other lipidemias	abdominal_pain	0	0	8.48043	1	1	Women
I10	Essential (primary) hypertension	E78	Disorders of lipoprotein metabolism and other lipidemias	tiredness	1.16818	0.536031	2.47907	0.718027	1	Women
I10	Essential (primary) hypertension	E78	Disorders of lipoprotein metabolism and other lipidemias	digestive	1.73768	0.325105	5.9832	0.422533	0.900794	Women
I10	Essential (primary) hypertension	E78	Disorders of lipoprotein metabolism and other lipidemias	menstrual_disturbances	0.336798	0.00813604	2.09139	0.511083	0.981389	Women
I10	Essential (primary) hypertension	E78	Disorders of lipoprotein metabolism and other lipidemias	chills	0.729694	0.0173205	4.7094	1	1	Women
I10	Essential (primary) hypertension	E78	Disorders of lipoprotein metabolism and other lipidemias	endocrin	1.76389	0.193777	7.64495	0.340459	0.873918	Women
I10	Essential (primary) hypertension	E78	Disorders of lipoprotein metabolism and other lipidemias	cardiovascular	0	0	1.31588	0.100907	0.727882	Women
I10	Essential (primary) hypertension	E78	Disorders of lipoprotein metabolism and other lipidemias	hematological	3.00124	0.0648153	24.4982	0.316295	0.847007	Women
I10	Essential (primary) hypertension	E78	Disorders of lipoprotein metabolism and other lipidemias	respiratory_problems	1.32625	0.571963	2.89787	0.433555	0.909961	Women
I10	Essential (primary) hypertension	E78	Disorders of lipoprotein metabolism and other lipidemias	muscular	1.29245	0.60549	2.73545	0.479683	0.955057	Women
I10	Essential (primary) hypertension	E78	Disorders of lipoprotein metabolism and other lipidemias	headache	2.26061	0.855868	5.35537	0.0598132	0.628909	Women
I10	Essential (primary) hypertension	E78	Disorders of lipoprotein metabolism and other lipidemias	cognitive	1.02096	0.411429	2.31298	1	1	Women
I10	Essential (primary) hypertension	E78	Disorders of lipoprotein metabolism and other lipidemias	renal	0	0	32.0626	1	1	Women
I10	Essential (primary) hypertension	E78	Disorders of lipoprotein metabolism and other lipidemias	loss_taste_smell	0.875929	0.290774	2.21237	1	1	Women
G43	Migraine	F41	Other anxiety disorders	dry_eyes_mouth	1.41951	0.54381	3.31105	0.367802	0.88066	Women
G43	Migraine	F41	Other anxiety disorders	tingling_sensation	1.02871	0.115446	4.28428	1	1	Women
G43	Migraine	F41	Other anxiety disorders	dermatological	1.64357	0.628091	3.84577	0.232978	0.802316	Women
G43	Migraine	F41	Other anxiety disorders	fever	5.10075	0.101124	53.4926	0.216741	0.795948	Women
G43	Migraine	F41	Other anxiety disorders	psychological	2.34357	1.05675	5.0031	0.0302956	0.537871	Women
G43	Migraine	F41	Other anxiety disorders	abdominal_pain	2.02967	0.0455085	15.0256	0.417084	0.89367	Women
G43	Migraine	F41	Other anxiety disorders	tiredness	1.25626	0.587378	2.63247	0.592308	1	Women
G43	Migraine	F41	Other anxiety disorders	digestive	3.16357	0.903399	8.95456	0.0355775	0.583794	Women
G43	Migraine	F41	Other anxiety disorders	menstrual_disturbances	0.685047	0.0776804	2.79966	1	1	Women
G43	Migraine	F41	Other anxiety disorders	chills	3.47908	0.829451	10.994	0.0435363	0.585809	Women
G43	Migraine	F41	Other anxiety disorders	endocrin	1.70803	0.18786	7.38702	0.35376	0.88066	Women
G43	Migraine	F41	Other anxiety disorders	cardiovascular	2.5775	0.836748	6.70856	0.0493788	0.585809	Women
G43	Migraine	F41	Other anxiety disorders	hematological	0	0	12.082	1	1	Women
G43	Migraine	F41	Other anxiety disorders	respiratory_problems	0.944631	0.382181	2.12751	1	1	Women
G43	Migraine	F41	Other anxiety disorders	muscular	1.08176	0.506084	2.26535	0.861177	1	Women
G43	Migraine	F41	Other anxiety disorders	headache	2.17341	0.825602	5.12477	0.0669006	0.64118	Women
G43	Migraine	F41	Other anxiety disorders	cognitive	1.72178	0.779455	3.65948	0.165233	0.731673	Women
G43	Migraine	F41	Other anxiety disorders	renal	6.80219	0.126664	87.3757	0.17741	0.74633	Women
G43	Migraine	F41	Other anxiety disorders	loss_taste_smell	0.674193	0.20056	1.79909	0.5172	0.988413	Women
F41	Other anxiety disorders	G56	Mononeuropathies of upper limb	dry_eyes_mouth	1.90247	0.755228	4.39869	0.148788	0.731673	Women
F41	Other anxiety disorders	G56	Mononeuropathies of upper limb	tingling_sensation	5.49282	1.87234	14.2935	0.00117649	0.261644	Women
F41	Other anxiety disorders	G56	Mononeuropathies of upper limb	dermatological	0.547172	0.104873	1.81212	0.455826	0.931491	Women
F41	Other anxiety disorders	G56	Mononeuropathies of upper limb	fever	0	0	24.7068	1	1	Women
F41	Other anxiety disorders	G56	Mononeuropathies of upper limb	psychological	1.06087	0.3798	2.58673	0.826922	1	Women
F41	Other anxiety disorders	G56	Mononeuropathies of upper limb	abdominal_pain	2.2352	0.0499926	16.6283	0.388842	0.88066	Women
F41	Other anxiety disorders	G56	Mononeuropathies of upper limb	tiredness	1.93361	0.891627	4.23474	0.0914617	0.706607	Women
F41	Other anxiety disorders	G56	Mononeuropathies of upper limb	digestive	1.8629	0.347341	6.44972	0.249127	0.802316	Women
F41	Other anxiety disorders	G56	Mononeuropathies of upper limb	menstrual_disturbances	0.756995	0.0855057	3.1168	1	1	Women
F41	Other anxiety disorders	G56	Mononeuropathies of upper limb	chills	2.69209	0.493422	9.59479	0.126577	0.731673	Women
F41	Other anxiety disorders	G56	Mononeuropathies of upper limb	endocrin	1.88679	0.206743	8.21597	0.313671	0.847007	Women
F41	Other anxiety disorders	G56	Mononeuropathies of upper limb	cardiovascular	0.771693	0.0871305	3.17972	1	1	Women
F41	Other anxiety disorders	G56	Mononeuropathies of upper limb	hematological	0	0	13.3197	1	1	Women
F41	Other anxiety disorders	G56	Mononeuropathies of upper limb	respiratory_problems	1.25631	0.520911	2.82682	0.544601	1	Women
F41	Other anxiety disorders	G56	Mononeuropathies of upper limb	muscular	1.46073	0.671794	3.17656	0.358508	0.88066	Women
F41	Other anxiety disorders	G56	Mononeuropathies of upper limb	headache	1.31279	0.384603	3.58436	0.582753	1	Women
F41	Other anxiety disorders	G56	Mononeuropathies of upper limb	cognitive	1.3032	0.540187	2.93342	0.537266	0.999759	Women
F41	Other anxiety disorders	G56	Mononeuropathies of upper limb	renal	0	0	34.2092	1	1	Women
F41	Other anxiety disorders	G56	Mononeuropathies of upper limb	loss_taste_smell	1.15862	0.414349	2.8286	0.655862	1	Women
F41	Other anxiety disorders	G43	Migraine	dry_eyes_mouth	1.49391	0.605995	3.34633	0.280666	0.82776	Women
F41	Other anxiety disorders	G43	Migraine	tingling_sensation	2.78043	0.799709	7.78371	0.0534313	0.602772	Women
F41	Other anxiety disorders	G43	Migraine	dermatological	1.2332	0.446722	2.95057	0.645503	1	Women
F41	Other anxiety disorders	G43	Migraine	fever	0	0	20.5329	1	1	Women
F41	Other anxiety disorders	G43	Migraine	psychological	2.05186	0.938833	4.28976	0.0621773	0.633921	Women
F41	Other anxiety disorders	G43	Migraine	abdominal_pain	1.85749	0.0417327	13.6944	0.444135	0.921452	Women
F41	Other anxiety disorders	G43	Migraine	tiredness	2.38576	1.17255	4.95632	0.00983937	0.409848	Women
F41	Other anxiety disorders	G43	Migraine	digestive	4.53375	1.56787	11.5524	0.00295186	0.261644	Women
F41	Other anxiety disorders	G43	Migraine	menstrual_disturbances	1.8051	0.528491	4.9242	0.219014	0.795948	Women
F41	Other anxiety disorders	G43	Migraine	chills	2.21196	0.40904	7.76885	0.184114	0.752436	Women
F41	Other anxiety disorders	G43	Migraine	endocrin	2.51088	0.460833	8.93185	0.145461	0.731673	Women
F41	Other anxiety disorders	G43	Migraine	cardiovascular	1.40231	0.348598	4.15022	0.531018	0.997825	Women
F41	Other anxiety disorders	G43	Migraine	hematological	0	0	11.0486	1	1	Women
F41	Other anxiety disorders	G43	Migraine	respiratory_problems	1.2794	0.575664	2.69093	0.459087	0.931491	Women
F41	Other anxiety disorders	G43	Migraine	muscular	1.46562	0.720131	2.98315	0.309561	0.847007	Women
F41	Other anxiety disorders	G43	Migraine	headache	3.09659	1.33353	6.75036	0.00432897	0.261644	Women
F41	Other anxiety disorders	G43	Migraine	cognitive	1.70274	0.79585	3.51469	0.130524	0.731673	Women
F41	Other anxiety disorders	G43	Migraine	renal	6.22639	0.11616	79.704	0.191431	0.758391	Women
F41	Other anxiety disorders	G43	Migraine	loss_taste_smell	0.469315	0.119008	1.34781	0.20623	0.786434	Women
F41	Other anxiety disorders	M51	Thoracic, thoracolum, and lumbosacral intvrt disc disorders	dry_eyes_mouth	1.13544	0.37288	2.91444	0.808928	1	Women
F41	Other anxiety disorders	M51	Thoracic, thoracolum, and lumbosacral intvrt disc disorders	tingling_sensation	1.17744	0.131425	4.95288	0.688844	1	Women
F41	Other anxiety disorders	M51	Thoracic, thoracolum, and lumbosacral intvrt disc disorders	dermatological	0.173038	0.00420307	1.06328	0.0716183	0.663179	Women
F41	Other anxiety disorders	M51	Thoracic, thoracolum, and lumbosacral intvrt disc disorders	fever	0	0	25.5781	1	1	Women
F41	Other anxiety disorders	M51	Thoracic, thoracolum, and lumbosacral intvrt disc disorders	psychological	1.57884	0.625963	3.66113	0.261443	0.812729	Women
F41	Other anxiety disorders	M51	Thoracic, thoracolum, and lumbosacral intvrt disc disorders	abdominal_pain	0	0	9.38056	1	1	Women
F41	Other anxiety disorders	M51	Thoracic, thoracolum, and lumbosacral intvrt disc disorders	tiredness	1.04857	0.456407	2.3174	1	1	Women
F41	Other anxiety disorders	M51	Thoracic, thoracolum, and lumbosacral intvrt disc disorders	digestive	1.21019	0.135005	5.09855	0.682759	1	Women
F41	Other anxiety disorders	M51	Thoracic, thoracolum, and lumbosacral intvrt disc disorders	menstrual_disturbances	0.784287	0.0884577	3.23811	1	1	Women
F41	Other anxiety disorders	M51	Thoracic, thoracolum, and lumbosacral intvrt disc disorders	chills	2.79203	0.510806	9.97769	0.117755	0.731673	Women
F41	Other anxiety disorders	M51	Thoracic, thoracolum, and lumbosacral intvrt disc disorders	endocrin	0	0	3.53787	0.620438	1	Women
F41	Other anxiety disorders	M51	Thoracic, thoracolum, and lumbosacral intvrt disc disorders	cardiovascular	1.78425	0.437687	5.3957	0.29646	0.840268	Women
F41	Other anxiety disorders	M51	Thoracic, thoracolum, and lumbosacral intvrt disc disorders	hematological	3.31439	0.0713968	27.1824	0.292447	0.838488	Women
F41	Other anxiety disorders	M51	Thoracic, thoracolum, and lumbosacral intvrt disc disorders	respiratory_problems	2.04279	0.901053	4.50937	0.0618198	0.633921	Women
F41	Other anxiety disorders	M51	Thoracic, thoracolum, and lumbosacral intvrt disc disorders	muscular	0.782729	0.333398	1.74426	0.5796	1	Women
F41	Other anxiety disorders	M51	Thoracic, thoracolum, and lumbosacral intvrt disc disorders	headache	0.471637	0.0536368	1.91918	0.411115	0.888731	Women
F41	Other anxiety disorders	M51	Thoracic, thoracolum, and lumbosacral intvrt disc disorders	cognitive	0.407812	0.102325	1.19261	0.0971292	0.712163	Women
F41	Other anxiety disorders	M51	Thoracic, thoracolum, and lumbosacral intvrt disc disorders	renal	0	0	35.3683	1	1	Women
F41	Other anxiety disorders	M51	Thoracic, thoracolum, and lumbosacral intvrt disc disorders	loss_taste_smell	0.428941	0.0822897	1.41925	0.244289	0.802316	Women
F17	Nicotine dependence	G43	Migraine	dry_eyes_mouth	1.84307	0.689278	4.45776	0.141757	0.731673	Women
F17	Nicotine dependence	G43	Migraine	tingling_sensation	2.02877	0.376422	7.08562	0.215265	0.795948	Women
F17	Nicotine dependence	G43	Migraine	dermatological	1.76311	0.620509	4.40727	0.194913	0.759318	Women
F17	Nicotine dependence	G43	Migraine	fever	0	0	27.4871	1	1	Women
F17	Nicotine dependence	G43	Migraine	psychological	2.80365	1.19254	6.39274	0.00966822	0.409848	Women
F17	Nicotine dependence	G43	Migraine	abdominal_pain	2.48456	0.0554048	18.5951	0.359361	0.88066	Women
F17	Nicotine dependence	G43	Migraine	tiredness	1.36277	0.59285	3.07599	0.437916	0.917336	Women
F17	Nicotine dependence	G43	Migraine	digestive	3.98701	1.12096	11.5573	0.016591	0.479996	Women
F17	Nicotine dependence	G43	Migraine	menstrual_disturbances	1.89469	0.462699	5.77185	0.280792	0.82776	Women
F17	Nicotine dependence	G43	Migraine	chills	1.86356	0.20443	8.09621	0.31831	0.847007	Women
F17	Nicotine dependence	G43	Migraine	endocrin	0.97432	0.0229213	6.41582	1	1	Women
F17	Nicotine dependence	G43	Migraine	cardiovascular	1.93262	0.471651	5.89324	0.276275	0.824258	Women
F17	Nicotine dependence	G43	Migraine	hematological	3.5603	0.0765413	29.3014	0.276147	0.824258	Women
F17	Nicotine dependence	G43	Migraine	respiratory_problems	0.559196	0.164281	1.52392	0.289162	0.832878	Women
F17	Nicotine dependence	G43	Migraine	muscular	1.01499	0.435196	2.29419	1	1	Women
F17	Nicotine dependence	G43	Migraine	headache	1.12523	0.278064	3.36941	0.775085	1	Women
F17	Nicotine dependence	G43	Migraine	cognitive	1.51728	0.618113	3.50499	0.286909	0.828593	Women
F17	Nicotine dependence	G43	Migraine	renal	8.31785	0.154193	107.345	0.148821	0.731673	Women
F17	Nicotine dependence	G43	Migraine	loss_taste_smell	0.648346	0.161358	1.92093	0.632036	1	Women
N92	Excessive, frequent and irregular menstruation	F41	Other anxiety disorders	dry_eyes_mouth	2.91105	1.16071	6.92863	0.0161263	0.479996	Women
N92	Excessive, frequent and irregular menstruation	F41	Other anxiety disorders	tingling_sensation	0	0	2.49446	0.39249	0.88066	Women
N92	Excessive, frequent and irregular menstruation	F41	Other anxiety disorders	dermatological	0.936998	0.231094	2.81766	1	1	Women
N92	Excessive, frequent and irregular menstruation	F41	Other anxiety disorders	fever	0	0	29.6841	1	1	Women
N92	Excessive, frequent and irregular menstruation	F41	Other anxiety disorders	psychological	3.73181	1.57635	8.77678	0.00119187	0.261644	Women
N92	Excessive, frequent and irregular menstruation	F41	Other anxiety disorders	abdominal_pain	2.68276	0.0596813	20.1744	0.338995	0.873918	Women
N92	Excessive, frequent and irregular menstruation	F41	Other anxiety disorders	tiredness	1.82462	0.782162	4.28741	0.155529	0.731673	Women
N92	Excessive, frequent and irregular menstruation	F41	Other anxiety disorders	digestive	3.24278	0.774444	10.2279	0.0529455	0.602772	Women
N92	Excessive, frequent and irregular menstruation	F41	Other anxiety disorders	menstrual_disturbances	0.915187	0.102505	3.83045	1	1	Women
N92	Excessive, frequent and irregular menstruation	F41	Other anxiety disorders	chills	3.27482	0.593894	11.8813	0.0851193	0.698365	Women
N92	Excessive, frequent and irregular menstruation	F41	Other anxiety disorders	endocrin	1.05225	0.0246922	6.96804	1	1	Women
N92	Excessive, frequent and irregular menstruation	F41	Other anxiety disorders	cardiovascular	1.48542	0.277677	5.12914	0.463932	0.932167	Women
N92	Excessive, frequent and irregular menstruation	F41	Other anxiety disorders	hematological	0	0	16.0176	1	1	Women
N92	Excessive, frequent and irregular menstruation	F41	Other anxiety disorders	respiratory_problems	1.93127	0.79487	4.52417	0.119105	0.731673	Women
N92	Excessive, frequent and irregular menstruation	F41	Other anxiety disorders	muscular	1.15563	0.486135	2.68869	0.696457	1	Women
N92	Excessive, frequent and irregular menstruation	F41	Other anxiety disorders	headache	2.06718	0.663762	5.48843	0.133691	0.731673	Women
N92	Excessive, frequent and irregular menstruation	F41	Other anxiety disorders	cognitive	2.00344	0.824298	4.69517	0.114688	0.731673	Women
N92	Excessive, frequent and irregular menstruation	F41	Other anxiety disorders	renal	8.97655	0.166089	116.132	0.139128	0.731673	Women
N92	Excessive, frequent and irregular menstruation	F41	Other anxiety disorders	loss_taste_smell	1.46048	0.511185	3.68659	0.456095	0.931491	Women
F41	Other anxiety disorders	K21	Gastro-esophageal reflux disease	dry_eyes_mouth	1.45605	0.515811	3.60543	0.459262	0.931491	Women
F41	Other anxiety disorders	K21	Gastro-esophageal reflux disease	tingling_sensation	2.77587	0.669424	8.61651	0.0791401	0.664408	Women
F41	Other anxiety disorders	K21	Gastro-esophageal reflux disease	dermatological	1.36862	0.447011	3.54214	0.448312	0.924804	Women
F41	Other anxiety disorders	K21	Gastro-esophageal reflux disease	fever	6.01748	0.118829	63.4518	0.188324	0.758391	Women
F41	Other anxiety disorders	K21	Gastro-esophageal reflux disease	psychological	1.9494	0.796427	4.47794	0.106579	0.727882	Women
F41	Other anxiety disorders	K21	Gastro-esophageal reflux disease	abdominal_pain	5.50394	0.553963	28.4393	0.0703034	0.662074	Women
F41	Other anxiety disorders	K21	Gastro-esophageal reflux disease	tiredness	1.69331	0.757792	3.78458	0.178739	0.74633	Women
F41	Other anxiety disorders	K21	Gastro-esophageal reflux disease	digestive	2.85698	0.688104	8.88529	0.0734825	0.663179	Women
F41	Other anxiety disorders	K21	Gastro-esophageal reflux disease	menstrual_disturbances	0.385602	0.00927805	2.4164	0.502302	0.973155	Women
F41	Other anxiety disorders	K21	Gastro-esophageal reflux disease	chills	2.89936	0.529389	10.3975	0.109186	0.727882	Women
F41	Other anxiety disorders	K21	Gastro-esophageal reflux disease	endocrin	4.76334	1.11386	15.519	0.017939	0.479996	Women
F41	Other anxiety disorders	K21	Gastro-esophageal reflux disease	cardiovascular	1.85567	0.454082	5.63413	0.285856	0.82776	Women
F41	Other anxiety disorders	K21	Gastro-esophageal reflux disease	hematological	0	0	14.2887	1	1	Women
F41	Other anxiety disorders	K21	Gastro-esophageal reflux disease	respiratory_problems	1.87557	0.807542	4.20701	0.137855	0.731673	Women
F41	Other anxiety disorders	K21	Gastro-esophageal reflux disease	muscular	0.956374	0.413414	2.13561	1	1	Women
F41	Other anxiety disorders	K21	Gastro-esophageal reflux disease	headache	1.42222	0.414296	3.91816	0.408751	0.888731	Women
F41	Other anxiety disorders	K21	Gastro-esophageal reflux disease	cognitive	1.43879	0.589823	3.29227	0.395739	0.88066	Women
F41	Other anxiety disorders	K21	Gastro-esophageal reflux disease	renal	0	0	36.6601	1	1	Women
F41	Other anxiety disorders	K21	Gastro-esophageal reflux disease	loss_taste_smell	0.622338	0.155314	1.83564	0.4855	0.962998	Women
E66	Overweight and obesity	F32	Major depressive disorder, single episode	dry_eyes_mouth	0.633463	0.119571	2.15709	0.598582	1	Women
E66	Overweight and obesity	F32	Major depressive disorder, single episode	tingling_sensation	0	0	2.71624	0.390363	0.88066	Women
E66	Overweight and obesity	F32	Major depressive disorder, single episode	dermatological	1.74252	0.556702	4.67062	0.258838	0.812729	Women
E66	Overweight and obesity	F32	Major depressive disorder, single episode	fever	0	0	32.2434	1	1	Women
E66	Overweight and obesity	F32	Major depressive disorder, single episode	psychological	0.943054	0.271993	2.64646	1	1	Women
E66	Overweight and obesity	F32	Major depressive disorder, single episode	abdominal_pain	0	0	11.8642	1	1	Women
E66	Overweight and obesity	F32	Major depressive disorder, single episode	tiredness	1.31392	0.531389	3.16716	0.532542	0.997825	Women
E66	Overweight and obesity	F32	Major depressive disorder, single episode	digestive	2.47954	0.454792	8.83276	0.149303	0.731673	Women
E66	Overweight and obesity	F32	Major depressive disorder, single episode	menstrual_disturbances	0.469469	0.0112198	2.98858	0.712996	1	Women
E66	Overweight and obesity	F32	Major depressive disorder, single episode	chills	1.01635	0.0238736	6.71585	1	1	Women
E66	Overweight and obesity	F32	Major depressive disorder, single episode	endocrin	1.14311	0.0267465	7.62014	0.599244	1	Women
E66	Overweight and obesity	F32	Major depressive disorder, single episode	cardiovascular	1.01706	0.113364	4.29614	1	1	Women
E66	Overweight and obesity	F32	Major depressive disorder, single episode	hematological	0	0	17.4275	1	1	Women
E66	Overweight and obesity	F32	Major depressive disorder, single episode	respiratory_problems	1.56379	0.598351	3.8335	0.356545	0.88066	Women
E66	Overweight and obesity	F32	Major depressive disorder, single episode	muscular	2.63826	1.0804	6.87223	0.0221758	0.48995	Women
E66	Overweight and obesity	F32	Major depressive disorder, single episode	headache	0.600349	0.0674891	2.49852	0.757997	1	Women
E66	Overweight and obesity	F32	Major depressive disorder, single episode	cognitive	1.10554	0.383912	2.82926	0.818393	1	Women
E66	Overweight and obesity	F32	Major depressive disorder, single episode	renal	0	0	44.6117	1	1	Women
E66	Overweight and obesity	F32	Major depressive disorder, single episode	loss_taste_smell	0.551643	0.104245	1.87488	0.446007	0.921804	Women
F41	Other anxiety disorders	K76	Other diseases of liver	dry_eyes_mouth	0.990328	0.240858	3.0511	1	1	Women
F41	Other anxiety disorders	K76	Other diseases of liver	tingling_sensation	0	0	2.97946	0.632751	1	Women
F41	Other anxiety disorders	K76	Other diseases of liver	dermatological	0.506067	0.0567559	2.11819	0.558738	1	Women
F41	Other anxiety disorders	K76	Other diseases of liver	fever	0	0	35.3332	1	1	Women
F41	Other anxiety disorders	K76	Other diseases of liver	psychological	1.05139	0.30012	3.00177	1	1	Women
F41	Other anxiety disorders	K76	Other diseases of liver	abdominal_pain	3.18672	0.0704668	24.2624	0.296488	0.840268	Women
F41	Other anxiety disorders	K76	Other diseases of liver	tiredness	2.20851	0.880616	5.71181	0.0784162	0.664408	Women
F41	Other anxiety disorders	K76	Other diseases of liver	digestive	0.785768	0.0185642	5.1286	1	1	Women
F41	Other anxiety disorders	K76	Other diseases of liver	menstrual_disturbances	0.513682	0.012233	3.29743	1	1	Women
F41	Other anxiety disorders	K76	Other diseases of liver	chills	1.11184	0.0260266	7.40539	0.608977	1	Women
F41	Other anxiety disorders	K76	Other diseases of liver	endocrin	1.25049	0.0291583	8.40171	0.568313	1	Women
F41	Other anxiety disorders	K76	Other diseases of liver	cardiovascular	0	0	2.02902	0.24631	0.802316	Women
F41	Other anxiety disorders	K76	Other diseases of liver	hematological	0	0	19.0861	1	1	Women
F41	Other anxiety disorders	K76	Other diseases of liver	respiratory_problems	0.75405	0.215821	2.14539	0.811006	1	Women
F41	Other anxiety disorders	K76	Other diseases of liver	muscular	0.921587	0.346962	2.3212	1	1	Women
F41	Other anxiety disorders	K76	Other diseases of liver	headache	0.659582	0.0737604	2.77395	0.756663	1	Women
F41	Other anxiety disorders	K76	Other diseases of liver	cognitive	0.781601	0.223673	2.2245	0.810426	1	Women
F41	Other anxiety disorders	K76	Other diseases of liver	renal	10.6533	0.19609	138.542	0.119494	0.731673	Women
F41	Other anxiety disorders	K76	Other diseases of liver	loss_taste_smell	0.608875	0.114252	2.09557	0.595219	1	Women
E78	Disorders of lipoprotein metabolism and other lipidemias	E55	Vitamin D deficiency	dry_eyes_mouth	2.60497	0.93473	6.71967	0.0448734	0.585809	Women
E78	Disorders of lipoprotein metabolism and other lipidemias	E55	Vitamin D deficiency	tingling_sensation	0	0	2.97946	0.632751	1	Women
E78	Disorders of lipoprotein metabolism and other lipidemias	E55	Vitamin D deficiency	dermatological	1.52173	0.432536	4.36979	0.385044	0.88066	Women
E78	Disorders of lipoprotein metabolism and other lipidemias	E55	Vitamin D deficiency	fever	7.996	0.156557	85.2483	0.14716	0.731673	Women
E78	Disorders of lipoprotein metabolism and other lipidemias	E55	Vitamin D deficiency	psychological	1.68316	0.574565	4.42252	0.294697	0.840268	Women
E78	Disorders of lipoprotein metabolism and other lipidemias	E55	Vitamin D deficiency	abdominal_pain	3.18672	0.0704668	24.2624	0.296488	0.840268	Women
E78	Disorders of lipoprotein metabolism and other lipidemias	E55	Vitamin D deficiency	tiredness	1.28446	0.496732	3.22107	0.662645	1	Women
E78	Disorders of lipoprotein metabolism and other lipidemias	E55	Vitamin D deficiency	digestive	1.69022	0.185448	7.34876	0.358957	0.88066	Women
E78	Disorders of lipoprotein metabolism and other lipidemias	E55	Vitamin D deficiency	menstrual_disturbances	1.0959	0.121561	4.67386	0.705968	1	Women
E78	Disorders of lipoprotein metabolism and other lipidemias	E55	Vitamin D deficiency	chills	2.41547	0.261557	10.7534	0.228228	0.802316	Women
E78	Disorders of lipoprotein metabolism and other lipidemias	E55	Vitamin D deficiency	endocrin	0	0	4.91765	1	1	Women
E78	Disorders of lipoprotein metabolism and other lipidemias	E55	Vitamin D deficiency	cardiovascular	1.11715	0.123866	4.76803	0.701258	1	Women
E78	Disorders of lipoprotein metabolism and other lipidemias	E55	Vitamin D deficiency	hematological	0	0	19.0861	1	1	Women
E78	Disorders of lipoprotein metabolism and other lipidemias	E55	Vitamin D deficiency	respiratory_problems	0.964603	0.306793	2.61168	1	1	Women
E78	Disorders of lipoprotein metabolism and other lipidemias	E55	Vitamin D deficiency	muscular	1.1089	0.429009	2.77956	0.831887	1	Women
E78	Disorders of lipoprotein metabolism and other lipidemias	E55	Vitamin D deficiency	headache	1.05162	0.196174	3.65318	1	1	Women
E78	Disorders of lipoprotein metabolism and other lipidemias	E55	Vitamin D deficiency	cognitive	1	0.317938	2.70833	1	1	Women
E78	Disorders of lipoprotein metabolism and other lipidemias	E55	Vitamin D deficiency	renal	0	0	48.757	1	1	Women
E78	Disorders of lipoprotein metabolism and other lipidemias	E55	Vitamin D deficiency	loss_taste_smell	0.861822	0.209903	2.65013	1	1	Women
E66	Overweight and obesity	G56	Mononeuropathies of upper limb	dry_eyes_mouth	1.39872	0.395967	4.04662	0.566528	1	Women
E66	Overweight and obesity	G56	Mononeuropathies of upper limb	tingling_sensation	1.72914	0.18932	7.55002	0.349804	0.88066	Women
E66	Overweight and obesity	G56	Mononeuropathies of upper limb	dermatological	1.20685	0.291587	3.75947	0.764229	1	Women
E66	Overweight and obesity	G56	Mononeuropathies of upper limb	fever	0	0	37.043	1	1	Women
E66	Overweight and obesity	G56	Mononeuropathies of upper limb	psychological	1.79832	0.608682	4.79024	0.192716	0.758391	Women
E66	Overweight and obesity	G56	Mononeuropathies of upper limb	abdominal_pain	3.34261	0.0737763	25.5324	0.28548	0.82776	Women
E66	Overweight and obesity	G56	Mononeuropathies of upper limb	tiredness	0.613388	0.194158	1.67545	0.376008	0.88066	Women
E66	Overweight and obesity	G56	Mononeuropathies of upper limb	digestive	0.824366	0.0194373	5.40521	1	1	Women
E66	Overweight and obesity	G56	Mononeuropathies of upper limb	menstrual_disturbances	0	0	2.0918	0.246268	0.802316	Women
E66	Overweight and obesity	G56	Mononeuropathies of upper limb	chills	1.1664	0.02725	7.8042	0.592422	1	Women
E66	Overweight and obesity	G56	Mononeuropathies of upper limb	endocrin	1.31183	0.0305287	8.85375	0.551999	1	Women
E66	Overweight and obesity	G56	Mononeuropathies of upper limb	cardiovascular	0	0	2.13216	0.246972	0.802316	Women
E66	Overweight and obesity	G56	Mononeuropathies of upper limb	hematological	0	0	20.0294	1	1	Women
E66	Overweight and obesity	G56	Mononeuropathies of upper limb	respiratory_problems	1.28657	0.436792	3.41475	0.625949	1	Women
E66	Overweight and obesity	G56	Mononeuropathies of upper limb	muscular	1.45282	0.562944	3.74949	0.388738	0.88066	Women
E66	Overweight and obesity	G56	Mononeuropathies of upper limb	headache	0.326339	0.00780196	2.07946	0.50647	0.974258	Women
E66	Overweight and obesity	G56	Mononeuropathies of upper limb	cognitive	1.64473	0.587771	4.28133	0.322382	0.85156	Women
E66	Overweight and obesity	G56	Mononeuropathies of upper limb	renal	0	0	51.1484	1	1	Women
E66	Overweight and obesity	G56	Mononeuropathies of upper limb	loss_taste_smell	0.911224	0.220839	2.8261	1	1	Women
F32	Major depressive disorder, single episode	F43	Reaction to severe stress, and adjustment disorders	dry_eyes_mouth	1.92325	0.599084	5.37555	0.237141	0.802316	Women
F32	Major depressive disorder, single episode	F43	Reaction to severe stress, and adjustment disorders	tingling_sensation	2.96238	0.535888	10.8165	0.106113	0.727882	Women
F32	Major depressive disorder, single episode	F43	Reaction to severe stress, and adjustment disorders	dermatological	1.27987	0.307563	4.02506	0.555129	1	Women
F32	Major depressive disorder, single episode	F43	Reaction to severe stress, and adjustment disorders	fever	8.812	0.171958	94.5898	0.135098	0.731673	Women
F32	Major depressive disorder, single episode	F43	Reaction to severe stress, and adjustment disorders	psychological	3.59657	1.34087	9.53504	0.00507342	0.261644	Women
F32	Major depressive disorder, single episode	F43	Reaction to severe stress, and adjustment disorders	abdominal_pain	0	0	14.3683	1	1	Women
F32	Major depressive disorder, single episode	F43	Reaction to severe stress, and adjustment disorders	tiredness	2.77201	1.04901	7.82321	0.023339	0.48995	Women
F32	Major depressive disorder, single episode	F43	Reaction to severe stress, and adjustment disorders	digestive	1.87332	0.204268	8.24329	0.317894	0.847007	Women
F32	Major depressive disorder, single episode	F43	Reaction to severe stress, and adjustment disorders	menstrual_disturbances	0.566729	0.0134393	3.67493	1	1	Women
F32	Major depressive disorder, single episode	F43	Reaction to severe stress, and adjustment disorders	chills	4.39993	0.78193	16.5255	0.0453583	0.585809	Women
F32	Major depressive disorder, single episode	F43	Reaction to severe stress, and adjustment disorders	endocrin	3.02321	0.323543	13.7604	0.167211	0.731673	Women
F32	Major depressive disorder, single episode	F43	Reaction to severe stress, and adjustment disorders	cardiovascular	3.89162	1.07268	11.6884	0.0195012	0.479996	Women
F32	Major depressive disorder, single episode	F43	Reaction to severe stress, and adjustment disorders	hematological	5.03219	0.106923	42.3745	0.207613	0.787974	Women
F32	Major depressive disorder, single episode	F43	Reaction to severe stress, and adjustment disorders	respiratory_problems	1.71126	0.604826	4.53605	0.315155	0.847007	Women
F32	Major depressive disorder, single episode	F43	Reaction to severe stress, and adjustment disorders	muscular	2.96086	1.10209	8.77923	0.0224833	0.48995	Women
F32	Major depressive disorder, single episode	F43	Reaction to severe stress, and adjustment disorders	headache	1.67506	0.400906	5.29654	0.319823	0.847007	Women
F32	Major depressive disorder, single episode	F43	Reaction to severe stress, and adjustment disorders	cognitive	1.13741	0.356169	3.15893	0.802413	1	Women
F32	Major depressive disorder, single episode	F43	Reaction to severe stress, and adjustment disorders	renal	0	0	53.7849	1	1	Women
F32	Major depressive disorder, single episode	F43	Reaction to severe stress, and adjustment disorders	loss_taste_smell	0.966421	0.232936	3.02603	1	1	Women
E78	Disorders of lipoprotein metabolism and other lipidemias	K21	Gastro-esophageal reflux disease	dry_eyes_mouth	3.01492	1.05901	8.0479	0.0192037	0.479996	Women
E78	Disorders of lipoprotein metabolism and other lipidemias	K21	Gastro-esophageal reflux disease	tingling_sensation	1.82257	0.198913	8.00891	0.328755	0.86628	Women
E78	Disorders of lipoprotein metabolism and other lipidemias	K21	Gastro-esophageal reflux disease	dermatological	1.27987	0.307563	4.02506	0.555129	1	Women
E78	Disorders of lipoprotein metabolism and other lipidemias	K21	Gastro-esophageal reflux disease	fever	8.812	0.171958	94.5898	0.135098	0.731673	Women
E78	Disorders of lipoprotein metabolism and other lipidemias	K21	Gastro-esophageal reflux disease	psychological	2.94274	1.07296	7.77907	0.0244296	0.48995	Women
E78	Disorders of lipoprotein metabolism and other lipidemias	K21	Gastro-esophageal reflux disease	abdominal_pain	3.51403	0.0774012	26.9699	0.274315	0.824258	Women
E78	Disorders of lipoprotein metabolism and other lipidemias	K21	Gastro-esophageal reflux disease	tiredness	1.02028	0.361607	2.69576	1	1	Women
E78	Disorders of lipoprotein metabolism and other lipidemias	K21	Gastro-esophageal reflux disease	digestive	4.42131	1.02948	14.544	0.0228845	0.48995	Women
E78	Disorders of lipoprotein metabolism and other lipidemias	K21	Gastro-esophageal reflux disease	menstrual_disturbances	0	0	2.20323	0.401705	0.88066	Women
E78	Disorders of lipoprotein metabolism and other lipidemias	K21	Gastro-esophageal reflux disease	chills	4.39993	0.78193	16.5255	0.0453583	0.585809	Women
E78	Disorders of lipoprotein metabolism and other lipidemias	K21	Gastro-esophageal reflux disease	endocrin	3.02321	0.323543	13.7604	0.167211	0.731673	Women
E78	Disorders of lipoprotein metabolism and other lipidemias	K21	Gastro-esophageal reflux disease	cardiovascular	2.87373	0.679599	9.24126	0.0755596	0.6641	Women
E78	Disorders of lipoprotein metabolism and other lipidemias	K21	Gastro-esophageal reflux disease	hematological	0	0	21.089	1	1	Women
E78	Disorders of lipoprotein metabolism and other lipidemias	K21	Gastro-esophageal reflux disease	respiratory_problems	2.56301	0.958852	6.76863	0.042336	0.585809	Women
E78	Disorders of lipoprotein metabolism and other lipidemias	K21	Gastro-esophageal reflux disease	muscular	1.08009	0.396439	2.83413	1	1	Women
E78	Disorders of lipoprotein metabolism and other lipidemias	K21	Gastro-esophageal reflux disease	headache	1.67506	0.400906	5.29654	0.319823	0.847007	Women
E78	Disorders of lipoprotein metabolism and other lipidemias	K21	Gastro-esophageal reflux disease	cognitive	1.13741	0.356169	3.15893	0.802413	1	Women
E78	Disorders of lipoprotein metabolism and other lipidemias	K21	Gastro-esophageal reflux disease	renal	0	0	53.7849	1	1	Women
E78	Disorders of lipoprotein metabolism and other lipidemias	K21	Gastro-esophageal reflux disease	loss_taste_smell	0.200263	0.00479602	1.27337	0.0965842	0.712163	Women
F43	Reaction to severe stress, and adjustment disorders	F41	Other anxiety disorders	dry_eyes_mouth	2.26134	0.763215	6.04404	0.0863106	0.702815	Women
F43	Reaction to severe stress, and adjustment disorders	F41	Other anxiety disorders	tingling_sensation	1.72914	0.18932	7.55002	0.349804	0.88066	Women
F43	Reaction to severe stress, and adjustment disorders	F41	Other anxiety disorders	dermatological	1.20685	0.291587	3.75947	0.764229	1	Women
F43	Reaction to severe stress, and adjustment disorders	F41	Other anxiety disorders	fever	8.38464	0.163907	89.7062	0.141146	0.731673	Women
F43	Reaction to severe stress, and adjustment disorders	F41	Other anxiety disorders	psychological	1.43335	0.45128	3.94072	0.431209	0.90856	Women
F43	Reaction to severe stress, and adjustment disorders	F41	Other anxiety disorders	abdominal_pain	0	0	13.6511	1	1	Women
F43	Reaction to severe stress, and adjustment disorders	F41	Other anxiety disorders	tiredness	1.39444	0.531789	3.57612	0.504598	0.974117	Women
F43	Reaction to severe stress, and adjustment disorders	F41	Other anxiety disorders	digestive	2.88256	0.523151	10.4622	0.111741	0.729007	Women
F43	Reaction to severe stress, and adjustment disorders	F41	Other anxiety disorders	menstrual_disturbances	0.538943	0.0128087	3.4762	1	1	Women
F43	Reaction to severe stress, and adjustment disorders	F41	Other anxiety disorders	chills	2.53948	0.274197	11.3674	0.213363	0.795948	Women
F43	Reaction to severe stress, and adjustment disorders	F41	Other anxiety disorders	endocrin	0	0	5.16619	1	1	Women
F43	Reaction to severe stress, and adjustment disorders	F41	Other anxiety disorders	cardiovascular	1.17472	0.129855	5.04285	0.689456	1	Women
F43	Reaction to severe stress, and adjustment disorders	F41	Other anxiety disorders	hematological	0	0	20.0294	1	1	Women
F43	Reaction to severe stress, and adjustment disorders	F41	Other anxiety disorders	respiratory_problems	2.34535	0.891623	6.03417	0.0522072	0.601494	Women
F43	Reaction to severe stress, and adjustment disorders	F41	Other anxiety disorders	muscular	1.45282	0.562944	3.74949	0.388738	0.88066	Women
F43	Reaction to severe stress, and adjustment disorders	F41	Other anxiety disorders	headache	2.1169	0.595454	6.17566	0.178785	0.74633	Women
F43	Reaction to severe stress, and adjustment disorders	F41	Other anxiety disorders	cognitive	1.06443	0.336006	2.9173	1	1	Women
F43	Reaction to severe stress, and adjustment disorders	F41	Other anxiety disorders	renal	0	0	51.1484	1	1	Women
F43	Reaction to severe stress, and adjustment disorders	F41	Other anxiety disorders	loss_taste_smell	0.911224	0.220839	2.8261	1	1	Women
E78	Disorders of lipoprotein metabolism and other lipidemias	M51	Thoracic, thoracolum, and lumbosacral intvrt disc disorders	dry_eyes_mouth	1.18168	0.282686	3.74787	0.765535	1	Women
E78	Disorders of lipoprotein metabolism and other lipidemias	M51	Thoracic, thoracolum, and lumbosacral intvrt disc disorders	tingling_sensation	0.889604	0.0208914	5.88983	1	1	Women
E78	Disorders of lipoprotein metabolism and other lipidemias	M51	Thoracic, thoracolum, and lumbosacral intvrt disc disorders	dermatological	0	0	1.07802	0.0570403	0.607462	Women
E78	Disorders of lipoprotein metabolism and other lipidemias	M51	Thoracic, thoracolum, and lumbosacral intvrt disc disorders	fever	0	0	41.0333	1	1	Women
E78	Disorders of lipoprotein metabolism and other lipidemias	M51	Thoracic, thoracolum, and lumbosacral intvrt disc disorders	psychological	1.64352	0.508699	4.6494	0.399888	0.88066	Women
E78	Disorders of lipoprotein metabolism and other lipidemias	M51	Thoracic, thoracolum, and lumbosacral intvrt disc disorders	abdominal_pain	0	0	15.1626	1	1	Women
E78	Disorders of lipoprotein metabolism and other lipidemias	M51	Thoracic, thoracolum, and lumbosacral intvrt disc disorders	tiredness	0.88958	0.296668	2.43446	1	1	Women
E78	Disorders of lipoprotein metabolism and other lipidemias	M51	Thoracic, thoracolum, and lumbosacral intvrt disc disorders	digestive	0.913736	0.0214455	6.05758	1	1	Women
E78	Disorders of lipoprotein metabolism and other lipidemias	M51	Thoracic, thoracolum, and lumbosacral intvrt disc disorders	menstrual_disturbances	0.597438	0.014133	3.89656	1	1	Women
E78	Disorders of lipoprotein metabolism and other lipidemias	M51	Thoracic, thoracolum, and lumbosacral intvrt disc disorders	chills	0	0	5.09386	1	1	Women
E78	Disorders of lipoprotein metabolism and other lipidemias	M51	Thoracic, thoracolum, and lumbosacral intvrt disc disorders	endocrin	3.19516	0.340741	14.6417	0.154535	0.731673	Women
E78	Disorders of lipoprotein metabolism and other lipidemias	M51	Thoracic, thoracolum, and lumbosacral intvrt disc disorders	cardiovascular	0.608836	0.0143985	3.97334	1	1	Women
E78	Disorders of lipoprotein metabolism and other lipidemias	M51	Thoracic, thoracolum, and lumbosacral intvrt disc disorders	hematological	5.30352	0.112431	44.8106	0.19866	0.765653	Women
E78	Disorders of lipoprotein metabolism and other lipidemias	M51	Thoracic, thoracolum, and lumbosacral intvrt disc disorders	respiratory_problems	1.17771	0.365539	3.31999	0.798358	1	Women
E78	Disorders of lipoprotein metabolism and other lipidemias	M51	Thoracic, thoracolum, and lumbosacral intvrt disc disorders	muscular	0.956968	0.33491	2.58254	1	1	Women
E78	Disorders of lipoprotein metabolism and other lipidemias	M51	Thoracic, thoracolum, and lumbosacral intvrt disc disorders	headache	1.78238	0.424017	5.69562	0.299376	0.842141	Women
E78	Disorders of lipoprotein metabolism and other lipidemias	M51	Thoracic, thoracolum, and lumbosacral intvrt disc disorders	cognitive	0.492454	0.0914455	1.73028	0.311428	0.847007	Women
E78	Disorders of lipoprotein metabolism and other lipidemias	M51	Thoracic, thoracolum, and lumbosacral intvrt disc disorders	renal	0	0	56.7091	1	1	Women
E78	Disorders of lipoprotein metabolism and other lipidemias	M51	Thoracic, thoracolum, and lumbosacral intvrt disc disorders	loss_taste_smell	1.02853	0.246388	3.2555	1	1	Women
F41	Other anxiety disorders	N91	Absent, scanty and rare menstruation	dry_eyes_mouth	0.22958	0.00549351	1.46198	0.150132	0.731673	Women
F41	Other anxiety disorders	N91	Absent, scanty and rare menstruation	tingling_sensation	0	0	3.29734	0.623736	1	Women
F41	Other anxiety disorders	N91	Absent, scanty and rare menstruation	dermatological	1.27987	0.307563	4.02506	0.555129	1	Women
F41	Other anxiety disorders	N91	Absent, scanty and rare menstruation	fever	0	0	38.9747	1	1	Women
F41	Other anxiety disorders	N91	Absent, scanty and rare menstruation	psychological	1.53144	0.478325	4.26673	0.413123	0.890947	Women
F41	Other anxiety disorders	N91	Absent, scanty and rare menstruation	abdominal_pain	3.51403	0.0774012	26.9699	0.274315	0.824258	Women
F41	Other anxiety disorders	N91	Absent, scanty and rare menstruation	tiredness	0.655705	0.205873	1.81506	0.49533	0.970058	Women
F41	Other anxiety disorders	N91	Absent, scanty and rare menstruation	digestive	0	0	3.38806	0.622052	1	Women
F41	Other anxiety disorders	N91	Absent, scanty and rare menstruation	menstrual_disturbances	0	0	2.20323	0.401705	0.88066	Women
F41	Other anxiety disorders	N91	Absent, scanty and rare menstruation	chills	0	0	4.82418	1	1	Women
F41	Other anxiety disorders	N91	Absent, scanty and rare menstruation	endocrin	0	0	5.44033	1	1	Women
F41	Other anxiety disorders	N91	Absent, scanty and rare menstruation	cardiovascular	0	0	2.24576	0.399287	0.88066	Women
F41	Other anxiety disorders	N91	Absent, scanty and rare menstruation	hematological	0	0	21.089	1	1	Women
F41	Other anxiety disorders	N91	Absent, scanty and rare menstruation	respiratory_problems	0.281028	0.0314641	1.18255	0.0812755	0.677087	Women
F41	Other anxiety disorders	N91	Absent, scanty and rare menstruation	muscular	1.60165	0.608755	4.2667	0.368355	0.88066	Women
F41	Other anxiety disorders	N91	Absent, scanty and rare menstruation	headache	1.172	0.216828	4.134	0.738127	1	Women
F41	Other anxiety disorders	N91	Absent, scanty and rare menstruation	cognitive	1.13741	0.356169	3.15893	0.802413	1	Women
F41	Other anxiety disorders	N91	Absent, scanty and rare menstruation	renal	11.7375	0.215379	153.113	0.109552	0.727882	Women
F41	Other anxiety disorders	N91	Absent, scanty and rare menstruation	loss_taste_smell	1.29447	0.364561	3.77995	0.58135	1	Women
J45	Asthma	J30	Vasomotor and allergic rhinitis	dry_eyes_mouth	0.633463	0.119571	2.15709	0.598582	1	Women
J45	Asthma	J30	Vasomotor and allergic rhinitis	tingling_sensation	0	0	2.71624	0.390363	0.88066	Women
J45	Asthma	J30	Vasomotor and allergic rhinitis	dermatological	0.729586	0.13753	2.4901	0.783488	1	Women
J45	Asthma	J30	Vasomotor and allergic rhinitis	fever	7.3121	0.143621	77.6672	0.159088	0.731673	Women
J45	Asthma	J30	Vasomotor and allergic rhinitis	psychological	1.20098	0.385513	3.1991	0.625421	1	Women
J45	Asthma	J30	Vasomotor and allergic rhinitis	abdominal_pain	0	0	11.8642	1	1	Women
J45	Asthma	J30	Vasomotor and allergic rhinitis	tiredness	1.31392	0.531389	3.16716	0.532542	0.997825	Women
J45	Asthma	J30	Vasomotor and allergic rhinitis	digestive	3.56091	0.844587	11.3569	0.0412929	0.585809	Women
J45	Asthma	J30	Vasomotor and allergic rhinitis	menstrual_disturbances	0.469469	0.0112198	2.98858	0.712996	1	Women
J45	Asthma	J30	Vasomotor and allergic rhinitis	chills	0	0	3.97598	0.618032	1	Women
J45	Asthma	J30	Vasomotor and allergic rhinitis	endocrin	1.14311	0.0267465	7.62014	0.599244	1	Women
J45	Asthma	J30	Vasomotor and allergic rhinitis	cardiovascular	1.01706	0.113364	4.29614	1	1	Women
J45	Asthma	J30	Vasomotor and allergic rhinitis	hematological	4.17448	0.0893007	34.6414	0.242558	0.802316	Women
J45	Asthma	J30	Vasomotor and allergic rhinitis	respiratory_problems	1.86622	0.736126	4.53039	0.165332	0.731673	Women
J45	Asthma	J30	Vasomotor and allergic rhinitis	muscular	0.80271	0.308207	1.96001	0.682452	1	Women
J45	Asthma	J30	Vasomotor and allergic rhinitis	headache	1.34788	0.328752	4.12584	0.539844	1	Women
J45	Asthma	J30	Vasomotor and allergic rhinitis	cognitive	0.700871	0.202634	1.96065	0.644086	1	Women
J45	Asthma	J30	Vasomotor and allergic rhinitis	renal	0	0	44.6117	1	1	Women
J45	Asthma	J30	Vasomotor and allergic rhinitis	loss_taste_smell	1.02874	0.296453	2.89078	1	1	Women
E66	Overweight and obesity	F39	Unspecified mood [affective] disorder	dry_eyes_mouth	0.939739	0.171851	3.39276	1	1	Women
E66	Overweight and obesity	F39	Unspecified mood [affective] disorder	tingling_sensation	0	0	3.91938	0.616877	1	Women
E66	Overweight and obesity	F39	Unspecified mood [affective] disorder	dermatological	0.669569	0.0737004	2.91047	1	1	Women
E66	Overweight and obesity	F39	Unspecified mood [affective] disorder	fever	0	0	46.0427	1	1	Women
E66	Overweight and obesity	F39	Unspecified mood [affective] disorder	psychological	0.465863	0.0514192	2.01569	0.391319	0.88066	Women
E66	Overweight and obesity	F39	Unspecified mood [affective] disorder	abdominal_pain	0	0	17.0404	1	1	Women
E66	Overweight and obesity	F39	Unspecified mood [affective] disorder	tiredness	1.05581	0.342683	3.024	1	1	Women
E66	Overweight and obesity	F39	Unspecified mood [affective] disorder	digestive	0	0	4.02696	0.616863	1	Women
E66	Overweight and obesity	F39	Unspecified mood [affective] disorder	menstrual_disturbances	1.4487	0.157746	6.41128	0.648945	1	Women
E66	Overweight and obesity	F39	Unspecified mood [affective] disorder	chills	1.4487	0.033504	9.92611	0.519178	0.989911	Women
E66	Overweight and obesity	F39	Unspecified mood [affective] disorder	endocrin	1.62923	0.0375341	11.2574	0.480615	0.955057	Women
E66	Overweight and obesity	F39	Unspecified mood [affective] disorder	cardiovascular	0.682469	0.0160446	4.51483	1	1	Women
E66	Overweight and obesity	F39	Unspecified mood [affective] disorder	hematological	0	0	24.9711	1	1	Women
E66	Overweight and obesity	F39	Unspecified mood [affective] disorder	respiratory_problems	1.76686	0.571978	5.07556	0.280159	0.82776	Women
E66	Overweight and obesity	F39	Unspecified mood [affective] disorder	muscular	1.82205	0.638896	5.38122	0.23029	0.802316	Women
E66	Overweight and obesity	F39	Unspecified mood [affective] disorder	headache	0.872403	0.0957604	3.80929	1	1	Women
E66	Overweight and obesity	F39	Unspecified mood [affective] disorder	cognitive	1.09202	0.300664	3.31939	0.79222	1	Women
E66	Overweight and obesity	F39	Unspecified mood [affective] disorder	renal	0	0	63.4048	1	1	Women
E66	Overweight and obesity	F39	Unspecified mood [affective] disorder	loss_taste_smell	0.23682	0.00562456	1.5363	0.223696	0.802316	Women
E66	Overweight and obesity	F43	Reaction to severe stress, and adjustment disorders	dry_eyes_mouth	0.271452	0.0064418	1.76349	0.340459	0.873918	Women
E66	Overweight and obesity	F43	Reaction to severe stress, and adjustment disorders	tingling_sensation	0.997063	0.023283	6.69058	1	1	Women
E66	Overweight and obesity	F43	Reaction to severe stress, and adjustment disorders	dermatological	0.311992	0.00739695	2.03046	0.334887	0.871834	Women
E66	Overweight and obesity	F43	Reaction to severe stress, and adjustment disorders	fever	0	0	46.0427	1	1	Women
E66	Overweight and obesity	F43	Reaction to severe stress, and adjustment disorders	psychological	2.46811	0.796685	7.11389	0.074905	0.6641	Women
E66	Overweight and obesity	F43	Reaction to severe stress, and adjustment disorders	abdominal_pain	0	0	17.0404	1	1	Women
E66	Overweight and obesity	F43	Reaction to severe stress, and adjustment disorders	tiredness	2.10921	0.739243	6.23176	0.139595	0.731673	Women
E66	Overweight and obesity	F43	Reaction to severe stress, and adjustment disorders	digestive	1.0241	0.0239004	6.88044	1	1	Women
E66	Overweight and obesity	F43	Reaction to severe stress, and adjustment disorders	menstrual_disturbances	0.669696	0.0157517	4.42782	1	1	Women
E66	Overweight and obesity	F43	Reaction to severe stress, and adjustment disorders	chills	3.19058	0.339312	14.7115	0.155425	0.731673	Women
E66	Overweight and obesity	F43	Reaction to severe stress, and adjustment disorders	endocrin	1.62923	0.0375341	11.2574	0.480615	0.955057	Women
E66	Overweight and obesity	F43	Reaction to severe stress, and adjustment disorders	cardiovascular	0	0	2.67024	0.38695	0.88066	Women
E66	Overweight and obesity	F43	Reaction to severe stress, and adjustment disorders	hematological	0	0	24.9711	1	1	Women
E66	Overweight and obesity	F43	Reaction to severe stress, and adjustment disorders	respiratory_problems	2.23636	0.754915	6.39974	0.104948	0.727882	Women
E66	Overweight and obesity	F43	Reaction to severe stress, and adjustment disorders	muscular	2.94735	1.01004	9.6816	0.0298062	0.537871	Women
E66	Overweight and obesity	F43	Reaction to severe stress, and adjustment disorders	headache	0.872403	0.0957604	3.80929	1	1	Women
E66	Overweight and obesity	F43	Reaction to severe stress, and adjustment disorders	cognitive	0.560154	0.102808	2.01139	0.429367	0.906442	Women
E66	Overweight and obesity	F43	Reaction to severe stress, and adjustment disorders	renal	0	0	63.4048	1	1	Women
E66	Overweight and obesity	F43	Reaction to severe stress, and adjustment disorders	loss_taste_smell	1.17936	0.278381	3.83158	0.764472	1	Women
F32	Major depressive disorder, single episode	G56	Mononeuropathies of upper limb	dry_eyes_mouth	2.61723	0.865488	7.23199	0.0650266	0.634448	Women
F32	Major depressive disorder, single episode	G56	Mononeuropathies of upper limb	tingling_sensation	3.14068	0.565484	11.5672	0.0945087	0.712163	Women
F32	Major depressive disorder, single episode	G56	Mononeuropathies of upper limb	dermatological	1.36198	0.325277	4.32861	0.536128	0.999358	Women
F32	Major depressive disorder, single episode	G56	Mononeuropathies of upper limb	fever	0	0	41.0333	1	1	Women
F32	Major depressive disorder, single episode	G56	Mononeuropathies of upper limb	psychological	2.08181	0.690345	5.73439	0.157607	0.731673	Women
F32	Major depressive disorder, single episode	G56	Mononeuropathies of upper limb	abdominal_pain	0	0	15.1626	1	1	Women
F32	Major depressive disorder, single episode	G56	Mononeuropathies of upper limb	tiredness	1.68033	0.618801	4.56322	0.251745	0.803123	Women
F32	Major depressive disorder, single episode	G56	Mononeuropathies of upper limb	digestive	3.23	0.580955	11.9143	0.0891286	0.705626	Women
F32	Major depressive disorder, single episode	G56	Mononeuropathies of upper limb	menstrual_disturbances	0.597438	0.014133	3.89656	1	1	Women
F32	Major depressive disorder, single episode	G56	Mononeuropathies of upper limb	chills	0	0	5.09386	1	1	Women
F32	Major depressive disorder, single episode	G56	Mononeuropathies of upper limb	endocrin	3.19516	0.340741	14.6417	0.154535	0.731673	Women
F32	Major depressive disorder, single episode	G56	Mononeuropathies of upper limb	cardiovascular	1.30899	0.143751	5.69752	0.666697	1	Women
F32	Major depressive disorder, single episode	G56	Mononeuropathies of upper limb	hematological	0	0	22.241	1	1	Women
F32	Major depressive disorder, single episode	G56	Mononeuropathies of upper limb	respiratory_problems	1.17771	0.365539	3.31999	0.798358	1	Women
F32	Major depressive disorder, single episode	G56	Mononeuropathies of upper limb	muscular	1.18092	0.42672	3.17923	0.818648	1	Women
F32	Major depressive disorder, single episode	G56	Mononeuropathies of upper limb	headache	0.773087	0.0855967	3.31702	1	1	Women
F32	Major depressive disorder, single episode	G56	Mononeuropathies of upper limb	cognitive	1.22089	0.37882	3.44259	0.796241	1	Women
F32	Major depressive disorder, single episode	G56	Mononeuropathies of upper limb	renal	0	0	56.7091	1	1	Women
F32	Major depressive disorder, single episode	G56	Mononeuropathies of upper limb	loss_taste_smell	0.719946	0.133365	2.53899	0.778998	1	Women
F34	Persistent mood [affective] disorders	F41	Other anxiety disorders	dry_eyes_mouth	2.63847	0.785734	7.95872	0.0963441	0.712163	Women
F34	Persistent mood [affective] disorders	F41	Other anxiety disorders	tingling_sensation	2.32097	0.249004	10.5506	0.243587	0.802316	Women
F34	Persistent mood [affective] disorders	F41	Other anxiety disorders	dermatological	1.16107	0.210564	4.25607	0.738519	1	Women
F34	Persistent mood [affective] disorders	F41	Other anxiety disorders	fever	0	0	48.995	1	1	Women
F34	Persistent mood [affective] disorders	F41	Other anxiety disorders	psychological	2.71908	0.862883	8.06906	0.0626311	0.633921	Women
F34	Persistent mood [affective] disorders	F41	Other anxiety disorders	abdominal_pain	0	0	18.1569	1	1	Women
F34	Persistent mood [affective] disorders	F41	Other anxiety disorders	tiredness	3.11714	1.04245	10.3889	0.0238083	0.48995	Women
F34	Persistent mood [affective] disorders	F41	Other anxiety disorders	digestive	2.38522	0.255704	10.8581	0.234791	0.802316	Women
F34	Persistent mood [affective] disorders	F41	Other anxiety disorders	menstrual_disturbances	0	0	2.79472	0.386578	0.88066	Women
F34	Persistent mood [affective] disorders	F41	Other anxiety disorders	chills	3.40741	0.360566	15.8683	0.141504	0.731673	Women
F34	Persistent mood [affective] disorders	F41	Other anxiety disorders	endocrin	3.84826	0.404947	18.1042	0.117929	0.731673	Women
F34	Persistent mood [affective] disorders	F41	Other anxiety disorders	cardiovascular	2.58215	0.461991	9.65495	0.14338	0.731673	Women
F34	Persistent mood [affective] disorders	F41	Other anxiety disorders	hematological	0	0	26.5988	1	1	Women
F34	Persistent mood [affective] disorders	F41	Other anxiety disorders	respiratory_problems	3.17146	1.06887	9.59955	0.0229805	0.48995	Women
F34	Persistent mood [affective] disorders	F41	Other anxiety disorders	muscular	1.2845	0.425864	3.79981	0.62558	1	Women
F34	Persistent mood [affective] disorders	F41	Other anxiety disorders	headache	2.20319	0.51193	7.34131	0.25256	0.803123	Women
F34	Persistent mood [affective] disorders	F41	Other anxiety disorders	cognitive	1.56201	0.467504	4.68525	0.404468	0.884927	Women
F34	Persistent mood [affective] disorders	F41	Other anxiety disorders	renal	0	0	67.5082	1	1	Women
F34	Persistent mood [affective] disorders	F41	Other anxiety disorders	loss_taste_smell	0.542168	0.0595017	2.37312	0.547748	1	Women
J30	Vasomotor and allergic rhinitis	J45	Asthma	dry_eyes_mouth	0.242069	0.00577797	1.55069	0.228001	0.802316	Women
J30	Vasomotor and allergic rhinitis	J45	Asthma	tingling_sensation	0	0	3.48203	0.620449	1	Women
J30	Vasomotor and allergic rhinitis	J45	Asthma	dermatological	0.593277	0.0658702	2.53362	0.754676	1	Women
J30	Vasomotor and allergic rhinitis	J45	Asthma	fever	0	0	41.0333	1	1	Women
J30	Vasomotor and allergic rhinitis	J45	Asthma	psychological	0.943436	0.22617	2.98274	1	1	Women
J30	Vasomotor and allergic rhinitis	J45	Asthma	abdominal_pain	0	0	15.1626	1	1	Women
J30	Vasomotor and allergic rhinitis	J45	Asthma	tiredness	0.406107	0.0977701	1.27644	0.107803	0.727882	Women
J30	Vasomotor and allergic rhinitis	J45	Asthma	digestive	0.913736	0.0214455	6.05758	1	1	Women
J30	Vasomotor and allergic rhinitis	J45	Asthma	menstrual_disturbances	1.28412	0.141073	5.58415	0.670452	1	Women
J30	Vasomotor and allergic rhinitis	J45	Asthma	chills	1.29273	0.0300641	8.74147	0.55726	1	Women
J30	Vasomotor and allergic rhinitis	J45	Asthma	endocrin	0	0	5.74425	1	1	Women
J30	Vasomotor and allergic rhinitis	J45	Asthma	cardiovascular	0	0	2.37185	0.393237	0.88066	Women
J30	Vasomotor and allergic rhinitis	J45	Asthma	hematological	0	0	22.241	1	1	Women
J30	Vasomotor and allergic rhinitis	J45	Asthma	respiratory_problems	0.297198	0.0331406	1.26001	0.122069	0.731673	Women
J30	Vasomotor and allergic rhinitis	J45	Asthma	muscular	0.470699	0.132364	1.38138	0.169866	0.731673	Women
J30	Vasomotor and allergic rhinitis	J45	Asthma	headache	1.24282	0.228806	4.42305	0.729004	1	Women
J30	Vasomotor and allergic rhinitis	J45	Asthma	cognitive	1.22089	0.37882	3.44259	0.796241	1	Women
J30	Vasomotor and allergic rhinitis	J45	Asthma	renal	0	0	56.7091	1	1	Women
J30	Vasomotor and allergic rhinitis	J45	Asthma	loss_taste_smell	0.211166	0.00504456	1.35075	0.148449	0.731673	Women
E66	Overweight and obesity	K21	Gastro-esophageal reflux disease	dry_eyes_mouth	1.59025	0.443828	4.71221	0.371546	0.88066	Women
E66	Overweight and obesity	K21	Gastro-esophageal reflux disease	tingling_sensation	1.92653	0.209496	8.52505	0.307551	0.847007	Women
E66	Overweight and obesity	K21	Gastro-esophageal reflux disease	dermatological	0.951733	0.175815	3.36981	1	1	Women
E66	Overweight and obesity	K21	Gastro-esophageal reflux disease	fever	0	0	41.0333	1	1	Women
E66	Overweight and obesity	K21	Gastro-esophageal reflux disease	psychological	3.96234	1.44977	10.829	0.0032355	0.261644	Women
E66	Overweight and obesity	K21	Gastro-esophageal reflux disease	abdominal_pain	3.70374	0.0813887	28.5368	0.262992	0.812729	Women
E66	Overweight and obesity	K21	Gastro-esophageal reflux disease	tiredness	0.88958	0.296668	2.43446	1	1	Women
E66	Overweight and obesity	K21	Gastro-esophageal reflux disease	digestive	1.98	0.215135	8.77417	0.297158	0.840268	Women
E66	Overweight and obesity	K21	Gastro-esophageal reflux disease	menstrual_disturbances	0.597438	0.014133	3.89656	1	1	Women
E66	Overweight and obesity	K21	Gastro-esophageal reflux disease	chills	0	0	5.09386	1	1	Women
E66	Overweight and obesity	K21	Gastro-esophageal reflux disease	endocrin	7.83275	1.76163	27.1357	0.00404562	0.261644	Women
E66	Overweight and obesity	K21	Gastro-esophageal reflux disease	cardiovascular	0.608836	0.0143985	3.97334	1	1	Women
E66	Overweight and obesity	K21	Gastro-esophageal reflux disease	hematological	0	0	22.241	1	1	Women
E66	Overweight and obesity	K21	Gastro-esophageal reflux disease	respiratory_problems	1.17771	0.365539	3.31999	0.798358	1	Women
E66	Overweight and obesity	K21	Gastro-esophageal reflux disease	muscular	1.18092	0.42672	3.17923	0.818648	1	Women
E66	Overweight and obesity	K21	Gastro-esophageal reflux disease	headache	1.24282	0.228806	4.42305	0.729004	1	Women
E66	Overweight and obesity	K21	Gastro-esophageal reflux disease	cognitive	3.60496	1.33395	10.0153	0.00718032	0.353468	Women
E66	Overweight and obesity	K21	Gastro-esophageal reflux disease	renal	0	0	56.7091	1	1	Women
E66	Overweight and obesity	K21	Gastro-esophageal reflux disease	loss_taste_smell	1.38302	0.386572	4.08989	0.56657	1	Women
G43	Migraine	J30	Vasomotor and allergic rhinitis	dry_eyes_mouth	1.59025	0.443828	4.71221	0.371546	0.88066	Women
G43	Migraine	J30	Vasomotor and allergic rhinitis	tingling_sensation	0.889604	0.0208914	5.88983	1	1	Women
G43	Migraine	J30	Vasomotor and allergic rhinitis	dermatological	1.36198	0.325277	4.32861	0.536128	0.999358	Women
G43	Migraine	J30	Vasomotor and allergic rhinitis	fever	9.28416	0.180814	100.011	0.129015	0.731673	Women
G43	Migraine	J30	Vasomotor and allergic rhinitis	psychological	2.59835	0.903654	7.06116	0.0474552	0.585809	Women
G43	Migraine	J30	Vasomotor and allergic rhinitis	abdominal_pain	8.65721	0.851918	46.4119	0.0333301	0.57296	Women
G43	Migraine	J30	Vasomotor and allergic rhinitis	tiredness	1.10765	0.387473	2.9904	0.818769	1	Women
G43	Migraine	J30	Vasomotor and allergic rhinitis	digestive	6.4503	1.7344	20.0849	0.00312102	0.261644	Women
G43	Migraine	J30	Vasomotor and allergic rhinitis	menstrual_disturbances	1.28412	0.141073	5.58415	0.670452	1	Women
G43	Migraine	J30	Vasomotor and allergic rhinitis	chills	2.82903	0.303388	12.8344	0.18402	0.752436	Women
G43	Migraine	J30	Vasomotor and allergic rhinitis	endocrin	0	0	5.74425	1	1	Women
G43	Migraine	J30	Vasomotor and allergic rhinitis	cardiovascular	2.11795	0.385935	7.65597	0.203887	0.780246	Women
G43	Migraine	J30	Vasomotor and allergic rhinitis	hematological	0	0	22.241	1	1	Women
G43	Migraine	J30	Vasomotor and allergic rhinitis	respiratory_problems	0.677818	0.162866	2.13636	0.614	1	Women
G43	Migraine	J30	Vasomotor and allergic rhinitis	muscular	1.78354	0.66251	4.93622	0.249659	0.802316	Women
G43	Migraine	J30	Vasomotor and allergic rhinitis	headache	3.1325	0.96043	8.96311	0.0292107	0.53619	Women
G43	Migraine	J30	Vasomotor and allergic rhinitis	cognitive	1.92569	0.671576	5.21609	0.193655	0.758391	Women
G43	Migraine	J30	Vasomotor and allergic rhinitis	renal	12.3637	0.226471	161.544	0.104549	0.727882	Women
G43	Migraine	J30	Vasomotor and allergic rhinitis	loss_taste_smell	1.02853	0.246388	3.2555	1	1	Women
M51	Thoracic, thoracolum, and lumbosacral intvrt disc disorders	F41	Other anxiety disorders	dry_eyes_mouth	0	0	1.20744	0.0894081	0.705626	Women
M51	Thoracic, thoracolum, and lumbosacral intvrt disc disorders	F41	Other anxiety disorders	tingling_sensation	0	0	4.47753	1	1	Women
M51	Thoracic, thoracolum, and lumbosacral intvrt disc disorders	F41	Other anxiety disorders	dermatological	0	0	1.38842	0.152812	0.731673	Women
M51	Thoracic, thoracolum, and lumbosacral intvrt disc disorders	F41	Other anxiety disorders	fever	0	0	52.3562	1	1	Women
M51	Thoracic, thoracolum, and lumbosacral intvrt disc disorders	F41	Other anxiety disorders	psychological	1.26623	0.293436	4.25536	0.75516	1	Women
M51	Thoracic, thoracolum, and lumbosacral intvrt disc disorders	F41	Other anxiety disorders	abdominal_pain	0	0	19.4274	1	1	Women
M51	Thoracic, thoracolum, and lumbosacral intvrt disc disorders	F41	Other anxiety disorders	tiredness	1.67528	0.541189	5.18707	0.308651	0.847007	Women
M51	Thoracic, thoracolum, and lumbosacral intvrt disc disorders	F41	Other anxiety disorders	digestive	4.24449	0.74392	16.4157	0.0508831	0.592542	Women
M51	Thoracic, thoracolum, and lumbosacral intvrt disc disorders	F41	Other anxiety disorders	menstrual_disturbances	0.761144	0.0177725	5.12114	1	1	Women
M51	Thoracic, thoracolum, and lumbosacral intvrt disc disorders	F41	Other anxiety disorders	chills	3.65479	0.384589	17.2189	0.127891	0.731673	Women
M51	Thoracic, thoracolum, and lumbosacral intvrt disc disorders	F41	Other anxiety disorders	endocrin	1.85135	0.0423513	12.9986	0.440941	0.920113	Women
M51	Thoracic, thoracolum, and lumbosacral intvrt disc disorders	F41	Other anxiety disorders	cardiovascular	1.69237	0.182227	7.66174	0.363733	0.88066	Women
M51	Thoracic, thoracolum, and lumbosacral intvrt disc disorders	F41	Other anxiety disorders	hematological	0	0	28.4467	1	1	Women
M51	Thoracic, thoracolum, and lumbosacral intvrt disc disorders	F41	Other anxiety disorders	respiratory_problems	0.910305	0.211431	3.05015	1	1	Women
M51	Thoracic, thoracolum, and lumbosacral intvrt disc disorders	F41	Other anxiety disorders	muscular	2.43992	0.793298	8.26182	0.120366	0.731673	Women
M51	Thoracic, thoracolum, and lumbosacral intvrt disc disorders	F41	Other anxiety disorders	headache	1	0.108566	4.46644	1	1	Women
M51	Thoracic, thoracolum, and lumbosacral intvrt disc disorders	F41	Other anxiety disorders	cognitive	1.2951	0.34808	4.10844	0.577387	1	Women
M51	Thoracic, thoracolum, and lumbosacral intvrt disc disorders	F41	Other anxiety disorders	renal	0	0	72.0836	1	1	Women
M51	Thoracic, thoracolum, and lumbosacral intvrt disc disorders	F41	Other anxiety disorders	loss_taste_smell	0.947673	0.170941	3.51349	1	1	Women
F43	Reaction to severe stress, and adjustment disorders	N92	Excessive, frequent and irregular menstruation	dry_eyes_mouth	1.46131	0.341422	4.8334	0.517479	0.988413	Women
F43	Reaction to severe stress, and adjustment disorders	N92	Excessive, frequent and irregular menstruation	tingling_sensation	3.82826	0.676837	14.5702	0.0632788	0.634448	Women
F43	Reaction to severe stress, and adjustment disorders	N92	Excessive, frequent and irregular menstruation	dermatological	0.715337	0.0783336	3.14213	1	1	Women
F43	Reaction to severe stress, and adjustment disorders	N92	Excessive, frequent and irregular menstruation	fever	0	0	48.995	1	1	Women
F43	Reaction to severe stress, and adjustment disorders	N92	Excessive, frequent and irregular menstruation	psychological	5.68586	1.91587	17.9227	0.000615642	0.261644	Women
F43	Reaction to severe stress, and adjustment disorders	N92	Excessive, frequent and irregular menstruation	abdominal_pain	0	0	18.1569	1	1	Women
F43	Reaction to severe stress, and adjustment disorders	N92	Excessive, frequent and irregular menstruation	tiredness	2.41537	0.818812	7.57045	0.0789278	0.664408	Women
F43	Reaction to severe stress, and adjustment disorders	N92	Excessive, frequent and irregular menstruation	digestive	0	0	4.29515	1	1	Women
F43	Reaction to severe stress, and adjustment disorders	N92	Excessive, frequent and irregular menstruation	menstrual_disturbances	0	0	2.79472	0.386578	0.88066	Women
F43	Reaction to severe stress, and adjustment disorders	N92	Excessive, frequent and irregular menstruation	chills	3.40741	0.360566	15.8683	0.141504	0.731673	Women
F43	Reaction to severe stress, and adjustment disorders	N92	Excessive, frequent and irregular menstruation	endocrin	1.73333	0.0398009	12.0646	0.461129	0.931491	Women
F43	Reaction to severe stress, and adjustment disorders	N92	Excessive, frequent and irregular menstruation	cardiovascular	1.57738	0.170827	7.05708	0.636899	1	Women
F43	Reaction to severe stress, and adjustment disorders	N92	Excessive, frequent and irregular menstruation	hematological	0	0	26.5988	1	1	Women
F43	Reaction to severe stress, and adjustment disorders	N92	Excessive, frequent and irregular menstruation	respiratory_problems	1.14343	0.311433	3.54341	0.785027	1	Women
F43	Reaction to severe stress, and adjustment disorders	N92	Excessive, frequent and irregular menstruation	muscular	1.2845	0.425864	3.79981	0.62558	1	Women
F43	Reaction to severe stress, and adjustment disorders	N92	Excessive, frequent and irregular menstruation	headache	3.02029	0.813595	9.49024	0.049764	0.585809	Women
F43	Reaction to severe stress, and adjustment disorders	N92	Excessive, frequent and irregular menstruation	cognitive	2.01841	0.642185	5.97202	0.165394	0.731673	Women
F43	Reaction to severe stress, and adjustment disorders	N92	Excessive, frequent and irregular menstruation	renal	0	0	67.5082	1	1	Women
F43	Reaction to severe stress, and adjustment disorders	N92	Excessive, frequent and irregular menstruation	loss_taste_smell	0.878569	0.159732	3.20834	1	1	Women
J30	Vasomotor and allergic rhinitis	G43	Migraine	dry_eyes_mouth	1.00849	0.183146	3.68886	1	1	Women
J30	Vasomotor and allergic rhinitis	G43	Migraine	tingling_sensation	1.06088	0.0246899	7.17594	1	1	Women
J30	Vasomotor and allergic rhinitis	G43	Migraine	dermatological	0.715337	0.0783336	3.14213	1	1	Women
J30	Vasomotor and allergic rhinitis	G43	Migraine	fever	0	0	48.995	1	1	Women
J30	Vasomotor and allergic rhinitis	G43	Migraine	psychological	0.80628	0.146672	2.9414	1	1	Women
J30	Vasomotor and allergic rhinitis	G43	Migraine	abdominal_pain	0	0	18.1569	1	1	Women
J30	Vasomotor and allergic rhinitis	G43	Migraine	tiredness	2.41537	0.818812	7.57045	0.0789278	0.664408	Women
J30	Vasomotor and allergic rhinitis	G43	Migraine	digestive	2.38522	0.255704	10.8581	0.234791	0.802316	Women
J30	Vasomotor and allergic rhinitis	G43	Migraine	menstrual_disturbances	2.53225	0.453296	9.46416	0.148905	0.731673	Women
J30	Vasomotor and allergic rhinitis	G43	Migraine	chills	1.54129	0.0355276	10.6436	0.498969	0.971526	Women
J30	Vasomotor and allergic rhinitis	G43	Migraine	endocrin	0	0	6.89232	1	1	Women
J30	Vasomotor and allergic rhinitis	G43	Migraine	cardiovascular	0	0	2.8485	0.387165	0.88066	Women
J30	Vasomotor and allergic rhinitis	G43	Migraine	hematological	0	0	26.5988	1	1	Women
J30	Vasomotor and allergic rhinitis	G43	Migraine	respiratory_problems	1.50694	0.451119	4.51764	0.413801	0.890947	Women
J30	Vasomotor and allergic rhinitis	G43	Migraine	muscular	0.779742	0.234068	2.33045	0.804127	1	Women
J30	Vasomotor and allergic rhinitis	G43	Migraine	headache	3.02029	0.813595	9.49024	0.049764	0.585809	Women
J30	Vasomotor and allergic rhinitis	G43	Migraine	cognitive	0.60125	0.109572	2.18775	0.580122	1	Women
J30	Vasomotor and allergic rhinitis	G43	Migraine	renal	0	0	67.5082	1	1	Women
J30	Vasomotor and allergic rhinitis	G43	Migraine	loss_taste_smell	0.252051	0.00596578	1.64891	0.218386	0.795948	Women
F41	Other anxiety disorders	H65	Nonsuppurative otitis media	dry_eyes_mouth	0.621872	0.0681778	2.72666	0.750488	1	Women
F41	Other anxiety disorders	H65	Nonsuppurative otitis media	tingling_sensation	2.32097	0.249004	10.5506	0.243587	0.802316	Women
F41	Other anxiety disorders	H65	Nonsuppurative otitis media	dermatological	1.16107	0.210564	4.25607	0.738519	1	Women
F41	Other anxiety disorders	H65	Nonsuppurative otitis media	fever	0	0	48.995	1	1	Women
F41	Other anxiety disorders	H65	Nonsuppurative otitis media	psychological	1.59282	0.432736	4.95145	0.371217	0.88066	Women
F41	Other anxiety disorders	H65	Nonsuppurative otitis media	abdominal_pain	0	0	18.1569	1	1	Women
F41	Other anxiety disorders	H65	Nonsuppurative otitis media	tiredness	1.4861	0.492551	4.39803	0.452975	0.930765	Women
F41	Other anxiety disorders	H65	Nonsuppurative otitis media	digestive	2.38522	0.255704	10.8581	0.234791	0.802316	Women
F41	Other anxiety disorders	H65	Nonsuppurative otitis media	menstrual_disturbances	0	0	2.79472	0.386578	0.88066	Women
F41	Other anxiety disorders	H65	Nonsuppurative otitis media	chills	3.40741	0.360566	15.8683	0.141504	0.731673	Women
F41	Other anxiety disorders	H65	Nonsuppurative otitis media	endocrin	1.73333	0.0398009	12.0646	0.461129	0.931491	Women
F41	Other anxiety disorders	H65	Nonsuppurative otitis media	cardiovascular	0.726181	0.0170148	4.84329	1	1	Women
F41	Other anxiety disorders	H65	Nonsuppurative otitis media	hematological	0	0	26.5988	1	1	Women
F41	Other anxiety disorders	H65	Nonsuppurative otitis media	respiratory_problems	4.05473	1.37067	12.7439	0.00482877	0.261644	Women
F41	Other anxiety disorders	H65	Nonsuppurative otitis media	muscular	1.00609	0.321153	2.96637	1	1	Women
F41	Other anxiety disorders	H65	Nonsuppurative otitis media	headache	0.931928	0.101774	4.11271	1	1	Women
F41	Other anxiety disorders	H65	Nonsuppurative otitis media	cognitive	0.86923	0.203941	2.85888	1	1	Women
F41	Other anxiety disorders	H65	Nonsuppurative otitis media	renal	0	0	67.5082	1	1	Women
F41	Other anxiety disorders	H65	Nonsuppurative otitis media	loss_taste_smell	1.27208	0.297606	4.19996	0.755847	1	Women
I10	Essential (primary) hypertension	K21	Gastro-esophageal reflux disease	dry_eyes_mouth	2.90633	0.851644	9.0199	0.0451811	0.585809	Women
I10	Essential (primary) hypertension	K21	Gastro-esophageal reflux disease	tingling_sensation	2.48992	0.265602	11.4493	0.222374	0.802316	Women
I10	Essential (primary) hypertension	K21	Gastro-esophageal reflux disease	dermatological	2.51649	0.672063	8.04533	0.088823	0.705626	Women
I10	Essential (primary) hypertension	K21	Gastro-esophageal reflux disease	fever	11.7943	0.227316	128.648	0.104343	0.727882	Women
I10	Essential (primary) hypertension	K21	Gastro-esophageal reflux disease	psychological	2.31569	0.680227	7.16787	0.117839	0.731673	Women
I10	Essential (primary) hypertension	K21	Gastro-esophageal reflux disease	abdominal_pain	4.71225	0.102327	37.2447	0.216077	0.795948	Women
I10	Essential (primary) hypertension	K21	Gastro-esophageal reflux disease	tiredness	1.2958	0.405122	3.96144	0.610873	1	Women
I10	Essential (primary) hypertension	K21	Gastro-esophageal reflux disease	digestive	2.55896	0.272747	11.7908	0.214169	0.795948	Women
I10	Essential (primary) hypertension	K21	Gastro-esophageal reflux disease	menstrual_disturbances	0.761144	0.0177725	5.12114	1	1	Women
I10	Essential (primary) hypertension	K21	Gastro-esophageal reflux disease	chills	3.65479	0.384589	17.2189	0.127891	0.731673	Women
I10	Essential (primary) hypertension	K21	Gastro-esophageal reflux disease	endocrin	6.94823	1.18999	27.8652	0.016161	0.479996	Women
I10	Essential (primary) hypertension	K21	Gastro-esophageal reflux disease	cardiovascular	0.775655	0.0181063	5.22156	1	1	Women
I10	Essential (primary) hypertension	K21	Gastro-esophageal reflux disease	hematological	0	0	28.4467	1	1	Women
I10	Essential (primary) hypertension	K21	Gastro-esophageal reflux disease	respiratory_problems	2.16701	0.675768	6.6411	0.151031	0.731673	Women
I10	Essential (primary) hypertension	K21	Gastro-esophageal reflux disease	muscular	2.43992	0.793298	8.26182	0.120366	0.731673	Women
I10	Essential (primary) hypertension	K21	Gastro-esophageal reflux disease	headache	4.4093	1.28346	13.7895	0.00916675	0.409848	Women
I10	Essential (primary) hypertension	K21	Gastro-esophageal reflux disease	cognitive	0.943339	0.219058	3.16147	1	1	Women
I10	Essential (primary) hypertension	K21	Gastro-esophageal reflux disease	renal	0	0	72.0836	1	1	Women
I10	Essential (primary) hypertension	K21	Gastro-esophageal reflux disease	loss_taste_smell	0.269312	0.00634969	1.77868	0.333958	0.871511	Women

## Sheet: Sup Table S8
Table S8. Results of the association between diseases and long COVID correcting by COVID-19 hospitalisation in aggregated (Both) and sex-stratified analysis (Women and Men).
ICD	Description	Analysis	OR	SE	CI 95% lower	CI 95% upper	p-value	Adjusted p-value	Chapter
D50	Iron deficiency anemia	Both	0.883462	0.254481	0.384689	1.38224	0.62633	0.774055	Diseases of the blood and blood-forming organs and certain disorders involving the immune mechanism
D70	Neutropenia	Both	0.788518	0.314103	0.172887	1.40415	0.449387	0.633957	Diseases of the blood and blood-forming organs and certain disorders involving the immune mechanism
D72	Other disorders of white blood cells	Both	0.918118	0.309671	0.311174	1.52506	0.782648	0.878691	Diseases of the blood and blood-forming organs and certain disorders involving the immune mechanism
E02	Subclinical iodine-deficiency hypothyroidism	Both	1.12701	0.187739	0.759052	1.49498	0.524188	0.699724	Endocrine, nutritional and metabolic diseases
E03	Other hypothyroidism	Both	1.41223	0.113967	1.18886	1.6356	0.00245621	0.01764	Endocrine, nutritional and metabolic diseases
E04	Other nontoxic goiter	Both	1.11047	0.167976	0.781241	1.43969	0.532766	0.699724	Endocrine, nutritional and metabolic diseases
E05	Thyrotoxicosis [hyperthyroidism]	Both	1.21234	0.236008	0.749775	1.67491	0.414569	0.617942	Endocrine, nutritional and metabolic diseases
E06	Thyroiditis	Both	1.28472	0.266317	0.762747	1.80669	0.34683	0.608879	Endocrine, nutritional and metabolic diseases
E11	Type 2 diabetes mellitus	Both	1.35093	0.178901	1.00029	1.70157	0.0927003	0.228854	Endocrine, nutritional and metabolic diseases
E55	Vitamin D deficiency	Both	1.13222	0.174246	0.790707	1.47374	0.476041	0.659775	Endocrine, nutritional and metabolic diseases
E66	Overweight and obesity	Both	1.22732	0.083232	1.06419	1.39045	0.0138544	0.0643823	Endocrine, nutritional and metabolic diseases
E78	Disorders of lipoprotein metabolism and other lipidemias	Both	1.19194	0.0792978	1.03652	1.34736	0.0268169	0.108547	Endocrine, nutritional and metabolic diseases
F10	Alcohol related disorders	Both	0.98641	0.294143	0.409902	1.56292	0.962898	0.983254	Mental, Behavioral and Neurodevelopmental disorders
F17	Nicotine dependence	Both	1.07015	0.0824587	0.908539	1.23177	0.410924	0.617942	Mental, Behavioral and Neurodevelopmental disorders
F18	Inhalant related disorders	Both	1.06057	0.187039	0.693982	1.42716	0.753207	0.875049	Mental, Behavioral and Neurodevelopmental disorders
F32	Major depressive disorder, single episode	Both	1.45556	0.100638	1.25831	1.65281	0.000191406	0.00189014	Mental, Behavioral and Neurodevelopmental disorders
F33	Major depressive disorder, recurrent	Both	1.10825	0.266777	0.58538	1.63113	0.700025	0.825403	Mental, Behavioral and Neurodevelopmental disorders
F34	Persistent mood [affective] disorders	Both	1.16694	0.129126	0.913858	1.42002	0.231846	0.43609	Mental, Behavioral and Neurodevelopmental disorders
F39	Unspecified mood [affective] disorder	Both	1.44498	0.138098	1.17431	1.71564	0.00768865	0.043386	Mental, Behavioral and Neurodevelopmental disorders
F40	Phobic anxiety disorders	Both	0.938752	0.305216	0.340539	1.53697	0.835949	0.892432	Mental, Behavioral and Neurodevelopmental disorders
F41	Other anxiety disorders	Both	1.48957	0.072338	1.34779	1.63135	3.61444e-08	2.8554e-06	Mental, Behavioral and Neurodevelopmental disorders
F43	Reaction to severe stress, and adjustment disorders	Both	1.47562	0.115492	1.24926	1.70198	0.000754793	0.00662541	Mental, Behavioral and Neurodevelopmental disorders
F45	Somatoform disorders	Both	1.29545	0.285487	0.735906	1.85499	0.364552	0.611548	Mental, Behavioral and Neurodevelopmental disorders
F51	Sleep disorders not due to a substance or known physiol cond	Both	1.23064	0.126619	0.982468	1.47881	0.101208	0.242285	Mental, Behavioral and Neurodevelopmental disorders
F52	Sexual dysfnct not due to a substance or known physiol cond	Both	1.18358	0.27523	0.644138	1.72302	0.540294	0.699724	Mental, Behavioral and Neurodevelopmental disorders
F60	Specific personality disorders	Both	1.38293	0.268964	0.855765	1.91009	0.228061	0.43609	Mental, Behavioral and Neurodevelopmental disorders
G43	Migraine	Both	1.6059	0.107412	1.39537	1.81642	1.03389e-05	0.000154913	Diseases of the nervous system
G44	Other headache syndromes	Both	1.53725	0.153578	1.23624	1.83825	0.00511292	0.0336601	Diseases of the nervous system
G47	Sleep disorders	Both	1.37327	0.172189	1.03579	1.71076	0.0654546	0.176167	Diseases of the nervous system
G56	Mononeuropathies of upper limb	Both	1.35762	0.120346	1.12175	1.5935	0.0110705	0.0546606	Diseases of the nervous system
G57	Mononeuropathies of lower limb	Both	1.4021	0.236016	0.939514	1.86468	0.152151	0.343427	Diseases of the nervous system
H25	Age-related cataract	Both	1.00683	0.243742	0.529109	1.48456	0.977705	0.983254	Diseases of the eye and adnexa
H26	Other cataract	Both	1.28735	0.292202	0.714644	1.86005	0.387358	0.612025	Diseases of the eye and adnexa
H40	Glaucoma	Both	0.694528	0.230741	0.242285	1.14677	0.114154	0.26524	Diseases of the eye and adnexa
H43	Disorders of vitreous body	Both	1.33874	0.231444	0.885116	1.79236	0.207501	0.409814	Diseases of the eye and adnexa
H54	Blindness and low vision	Both	0.95762	0.148544	0.666479	1.24876	0.770649	0.878691	Diseases of the eye and adnexa
H60	Otitis externa	Both	1.27674	0.114682	1.05197	1.50151	0.0331447	0.124687	Diseases of the ear and mastoid process
H65	Nonsuppurative otitis media	Both	1.58021	0.207546	1.17343	1.987	0.0274803	0.108547	Diseases of the ear and mastoid process
H90	Conductive and sensorineural hearing loss	Both	1.25016	0.272889	0.715305	1.78501	0.41326	0.617942	Diseases of the ear and mastoid process
H91	Other and unspecified hearing loss	Both	1.32138	0.122816	1.08067	1.5621	0.0232636	0.102101	Diseases of the ear and mastoid process
I10	Essential (primary) hypertension	Both	1.1833	0.0925999	1.00181	1.36479	0.0691287	0.176167	Diseases of the circulatory system
I13	Hypertensive heart and chronic kidney disease	Both	1.09789	0.23384	0.639567	1.5562	0.689629	0.825403	Diseases of the circulatory system
I45	Other conduction disorders	Both	1.07268	0.273668	0.536298	1.60906	0.797674	0.878691	Diseases of the circulatory system
I49	Other cardiac arrhythmias	Both	1.8357	0.188474	1.46629	2.2051	0.00126919	0.0100266	Diseases of the circulatory system
J30	Vasomotor and allergic rhinitis	Both	1.49453	0.0899965	1.31814	1.67092	8.01592e-06	0.000154913	Diseases of the respiratory system
J31	Chronic rhinitis, nasopharyngitis and pharyngitis	Both	1.38129	0.241891	0.907193	1.85539	0.18175	0.382857	Diseases of the respiratory system
J32	Chronic sinusitis	Both	1.23096	0.274467	0.693014	1.7689	0.449002	0.633957	Diseases of the respiratory system
J44	Other chronic obstructive pulmonary disease	Both	1.07519	0.287389	0.511921	1.63846	0.800832	0.878691	Diseases of the respiratory system
J45	Asthma	Both	1.77425	0.120292	1.53848	2.01002	1.87405e-06	5.79338e-05	Diseases of the respiratory system
K05	Gingivitis and periodontal diseases	Both	1.43941	0.274258	0.90187	1.97694	0.184159	0.382857	Diseases of the digestive system
K08	Other disorders of teeth and supporting structures	Both	1.71422	0.266313	1.19226	2.23618	0.0429927	0.134215	Diseases of the digestive system
K21	Gastro-esophageal reflux disease	Both	1.75587	0.128476	1.50407	2.00768	1.17655e-05	0.000154913	Diseases of the digestive system
K29	Gastritis and duodenitis	Both	1.72355	0.211372	1.30927	2.13783	0.0100102	0.0527204	Diseases of the digestive system
K57	Diverticular disease of intestine	Both	1.22558	0.200356	0.832892	1.61827	0.309976	0.556547	Diseases of the digestive system
K58	Irritable bowel syndrome	Both	1.5676	0.223383	1.12978	2.00543	0.0441721	0.134215	Diseases of the digestive system
K76	Other diseases of liver	Both	1.36581	0.15216	1.06759	1.66404	0.0404785	0.134215	Diseases of the digestive system
L20	Atopic dermatitis	Both	1.0214	0.190697	0.647639	1.39516	0.911595	0.947579	Diseases of the skin and subcutaneous tissue
L40	Psoriasis	Both	1.21458	0.177465	0.866758	1.56241	0.273327	0.50216	Diseases of the skin and subcutaneous tissue
L71	Rosacea	Both	0.83105	0.321546	0.200831	1.46127	0.56492	0.719818	Diseases of the skin and subcutaneous tissue
M10	Gout	Both	0.9239	0.341471	0.254629	1.59317	0.816697	0.883823	Diseases of the musculoskeletal system and connective tissue
M12	Other and unspecified arthropathy	Both	1.0235	0.189518	0.65205	1.39495	0.902457	0.947579	Diseases of the musculoskeletal system and connective tissue
M13	Other arthritis	Both	0.995205	0.229004	0.546365	1.44404	0.983254	0.983254	Diseases of the musculoskeletal system and connective tissue
M15	Polyosteoarthritis	Both	1.44828	0.270247	0.91861	1.97796	0.170524	0.374205	Diseases of the musculoskeletal system and connective tissue
M16	Osteoarthritis of hip	Both	1.17885	0.24713	0.694488	1.66322	0.505529	0.688566	Diseases of the musculoskeletal system and connective tissue
M17	Osteoarthritis of knee	Both	1.16142	0.167477	0.833174	1.48967	0.371573	0.611548	Diseases of the musculoskeletal system and connective tissue
M18	Osteoarthritis of first carpometacarpal joint	Both	1.4887	0.214159	1.06896	1.90844	0.0631713	0.176167	Diseases of the musculoskeletal system and connective tissue
M19	Other and unspecified osteoarthritis	Both	1.08276	0.16366	0.761991	1.40353	0.627082	0.774055	Diseases of the musculoskeletal system and connective tissue
M20	Acquired deformities of fingers and toes	Both	1.12162	0.148805	0.829971	1.41328	0.440511	0.633957	Diseases of the musculoskeletal system and connective tissue
M22	Disorder of patella	Both	1.08309	0.205333	0.680649	1.48554	0.697466	0.825403	Diseases of the musculoskeletal system and connective tissue
M23	Internal derangement of knee	Both	1.30619	0.126601	1.05806	1.55432	0.0348677	0.125207	Diseases of the musculoskeletal system and connective tissue
M41	Scoliosis	Both	1.17929	0.190475	0.805968	1.55262	0.386596	0.612025	Diseases of the musculoskeletal system and connective tissue
M47	Spondylosis	Both	1.57818	0.165683	1.25344	1.90291	0.00588959	0.0357906	Diseases of the musculoskeletal system and connective tissue
M50	Cervical disc disorders	Both	1.51087	0.207145	1.10488	1.91687	0.0463423	0.135594	Diseases of the musculoskeletal system and connective tissue
M51	Thoracic, thoracolum, and lumbosacral intvrt disc disorders	Both	1.71585	0.114046	1.49232	1.93938	2.20002e-06	5.79338e-05	Diseases of the musculoskeletal system and connective tissue
M81	Osteoporosis without current pathological fracture	Both	0.835046	0.199406	0.444218	1.22587	0.365978	0.611548	Diseases of the musculoskeletal system and connective tissue
N39	Other disorders of urinary system	Both	2.2646	0.193464	1.88541	2.64378	2.38874e-05	0.000269586	Diseases of the genitourinary system
Q40	Other congenital malformations of upper alimentary tract	Both	1.53258	0.234531	1.07291	1.99225	0.0686886	0.176167	Congenital malformations, deformations and chromosomal abnormalities
R32	Unspecified urinary incontinence	Both	1.43651	0.178753	1.08616	1.78686	0.0427296	0.134215	Symptoms, signs and abnormal clinical and laboratory findings, not elsewhere classified
Z96	Presence of other functional implants	Both	1.4268	0.280738	0.876562	1.97704	0.205489	0.409814	Factors influencing health status and contact with health services
C50	Malignant neoplasm of breast	Women	1.24894	0.283456	0.693378	1.80451	0.432901	0.675363	Neoplasms
D50	Iron deficiency anemia	Women	0.980746	0.255245	0.480475	1.48102	0.939286	0.98198	Diseases of the blood and blood-forming organs and certain disorders involving the immune mechanism
D70	Neutropenia	Women	0.830256	0.350124	0.144026	1.51649	0.595211	0.811977	Diseases of the blood and blood-forming organs and certain disorders involving the immune mechanism
D72	Other disorders of white blood cells	Women	0.59254	0.41071	-0.212437	1.39752	0.202584	0.477814	Diseases of the blood and blood-forming organs and certain disorders involving the immune mechanism
E02	Subclinical iodine-deficiency hypothyroidism	Women	1.03707	0.202415	0.640345	1.4338	0.857289	0.927214	Endocrine, nutritional and metabolic diseases
E03	Other hypothyroidism	Women	1.438	0.118992	1.20478	1.67122	0.00226763	0.0189656	Endocrine, nutritional and metabolic diseases
E04	Other nontoxic goiter	Women	1.10654	0.174847	0.763848	1.44924	0.562575	0.796261	Endocrine, nutritional and metabolic diseases
E05	Thyrotoxicosis [hyperthyroidism]	Women	1.14069	0.251126	0.648493	1.63289	0.600157	0.811977	Endocrine, nutritional and metabolic diseases
E06	Thyroiditis	Women	1.30421	0.276111	0.763044	1.84538	0.336086	0.602886	Endocrine, nutritional and metabolic diseases
E11	Type 2 diabetes mellitus	Women	1.59075	0.236346	1.12752	2.05398	0.0495207	0.198083	Endocrine, nutritional and metabolic diseases
E28	Ovarian dysfunction	Women	0.75671	0.305352	0.15823	1.35519	0.361262	0.608849	Endocrine, nutritional and metabolic diseases
E55	Vitamin D deficiency	Women	1.19757	0.184781	0.835403	1.55973	0.32921	0.602886	Endocrine, nutritional and metabolic diseases
E66	Overweight and obesity	Women	1.25833	0.0989742	1.06434	1.45231	0.0202526	0.112017	Endocrine, nutritional and metabolic diseases
E78	Disorders of lipoprotein metabolism and other lipidemias	Women	1.16095	0.0968302	0.971167	1.35073	0.123256	0.323987	Endocrine, nutritional and metabolic diseases
E89	Postproc endocrine and metabolic comp and disorders, NEC	Women	0.69904	0.474386	-0.23074	1.62882	0.450393	0.690602	Endocrine, nutritional and metabolic diseases
F17	Nicotine dependence	Women	1.02896	0.0987639	0.835389	1.22254	0.772515	0.878882	Mental, Behavioral and Neurodevelopmental disorders
F18	Inhalant related disorders	Women	1.09302	0.223437	0.655087	1.53094	0.69059	0.870333	Mental, Behavioral and Neurodevelopmental disorders
F32	Major depressive disorder, single episode	Women	1.46834	0.111354	1.25009	1.68659	0.000561356	0.00573831	Mental, Behavioral and Neurodevelopmental disorders
F33	Major depressive disorder, recurrent	Women	1.01185	0.310582	0.40312	1.62058	0.969743	0.986029	Mental, Behavioral and Neurodevelopmental disorders
F34	Persistent mood [affective] disorders	Women	1.2291	0.140784	0.953169	1.50503	0.142855	0.351621	Mental, Behavioral and Neurodevelopmental disorders
F39	Unspecified mood [affective] disorder	Women	1.43529	0.152444	1.1365	1.73407	0.0177648	0.108958	Mental, Behavioral and Neurodevelopmental disorders
F40	Phobic anxiety disorders	Women	0.958738	0.355471	0.262027	1.65545	0.905641	0.957689	Mental, Behavioral and Neurodevelopmental disorders
F41	Other anxiety disorders	Women	1.48998	0.0831729	1.32696	1.65299	1.63201e-06	7.50724e-05	Mental, Behavioral and Neurodevelopmental disorders
F43	Reaction to severe stress, and adjustment disorders	Women	1.55958	0.127209	1.31026	1.80891	0.000476536	0.00548016	Mental, Behavioral and Neurodevelopmental disorders
F45	Somatoform disorders	Women	1.47898	0.310648	0.870119	2.08784	0.207745	0.477814	Mental, Behavioral and Neurodevelopmental disorders
F50	Eating disorders	Women	1.65573	0.332643	1.00376	2.3077	0.129554	0.331081	Mental, Behavioral and Neurodevelopmental disorders
F51	Sleep disorders not due to a substance or known physiol cond	Women	0.997303	0.15422	0.695038	1.29957	0.986029	0.986029	Mental, Behavioral and Neurodevelopmental disorders
F60	Specific personality disorders	Women	1.67696	0.303605	1.0819	2.27201	0.0886051	0.249154	Mental, Behavioral and Neurodevelopmental disorders
G25	Other extrapyramidal and movement disorders	Women	1.08881	0.376334	0.351211	1.82641	0.821127	0.899329	Diseases of the nervous system
G43	Migraine	Women	1.63179	0.114953	1.40649	1.8571	2.04582e-05	0.000470538	Diseases of the nervous system
G44	Other headache syndromes	Women	1.29473	0.177338	0.947158	1.64231	0.145235	0.351621	Diseases of the nervous system
G47	Sleep disorders	Women	1.33559	0.263742	0.818666	1.85252	0.27256	0.535931	Diseases of the nervous system
G56	Mononeuropathies of upper limb	Women	1.33766	0.132137	1.07868	1.59665	0.0276887	0.134165	Diseases of the nervous system
G57	Mononeuropathies of lower limb	Women	1.25387	0.276528	0.711883	1.79585	0.413288	0.675363	Diseases of the nervous system
H25	Age-related cataract	Women	1.11789	0.269935	0.588826	1.64695	0.67972	0.868531	Diseases of the eye and adnexa
H26	Other cataract	Women	1.10528	0.364067	0.391726	1.81884	0.783351	0.878882	Diseases of the eye and adnexa
H35	Other retinal disorders	Women	1.40639	0.375666	0.670101	2.14268	0.363986	0.608849	Diseases of the eye and adnexa
H40	Glaucoma	Women	0.616759	0.292512	0.0434465	1.19007	0.0985022	0.266535	Diseases of the eye and adnexa
H43	Disorders of vitreous body	Women	1.15476	0.274042	0.617645	1.69187	0.599537	0.811977	Diseases of the eye and adnexa
H54	Blindness and low vision	Women	0.914948	0.178614	0.56487	1.26503	0.61873	0.813188	Diseases of the eye and adnexa
H60	Otitis externa	Women	1.34182	0.133563	1.08004	1.60359	0.0277079	0.134165	Diseases of the ear and mastoid process
H65	Nonsuppurative otitis media	Women	1.82651	0.226775	1.38204	2.27098	0.00789783	0.0558923	Diseases of the ear and mastoid process
H90	Conductive and sensorineural hearing loss	Women	1.42031	0.313873	0.805131	2.03549	0.263613	0.535931	Diseases of the ear and mastoid process
H91	Other and unspecified hearing loss	Women	1.33465	0.150164	1.04034	1.62897	0.05456	0.199697	Diseases of the ear and mastoid process
I10	Essential (primary) hypertension	Women	1.2361	0.116894	1.007	1.46521	0.0697854	0.219154	Diseases of the circulatory system
I13	Hypertensive heart and chronic kidney disease	Women	1.0734	0.243695	0.595767	1.55103	0.771314	0.878882	Diseases of the circulatory system
I45	Other conduction disorders	Women	0.730823	0.449217	-0.149626	1.61127	0.485135	0.721753	Diseases of the circulatory system
I49	Other cardiac arrhythmias	Women	2.1516	0.226846	1.70699	2.59621	0.000730982	0.00672503	Diseases of the circulatory system
J30	Vasomotor and allergic rhinitis	Women	1.75541	0.103889	1.55179	1.95903	6.08172e-08	5.59518e-06	Diseases of the respiratory system
J31	Chronic rhinitis, nasopharyngitis and pharyngitis	Women	1.00787	0.309745	0.400782	1.61496	0.979805	0.986029	Diseases of the respiratory system
J32	Chronic sinusitis	Women	1.38276	0.296133	0.802348	1.96317	0.273791	0.535931	Diseases of the respiratory system
J44	Other chronic obstructive pulmonary disease	Women	0.77099	0.388536	0.00947444	1.53251	0.503251	0.734795	Diseases of the respiratory system
J45	Asthma	Women	1.83067	0.140675	1.55495	2.10638	1.72013e-05	0.000470538	Diseases of the respiratory system
K05	Gingivitis and periodontal diseases	Women	1.43969	0.338853	0.775555	2.10383	0.282158	0.540803	Diseases of the digestive system
K08	Other disorders of teeth and supporting structures	Women	1.82451	0.317495	1.20223	2.44679	0.0582359	0.199697	Diseases of the digestive system
K21	Gastro-esophageal reflux disease	Women	1.88884	0.155122	1.58481	2.19287	4.13576e-05	0.00063415	Diseases of the digestive system
K29	Gastritis and duodenitis	Women	1.56987	0.2502	1.07948	2.06025	0.0714632	0.219154	Diseases of the digestive system
K57	Diverticular disease of intestine	Women	1.08408	0.257421	0.579542	1.58861	0.753817	0.878882	Diseases of the digestive system
K58	Irritable bowel syndrome	Women	1.61637	0.253912	1.11871	2.11402	0.0586067	0.199697	Diseases of the digestive system
K76	Other diseases of liver	Women	1.64124	0.183812	1.28098	2.00151	0.00702952	0.053893	Diseases of the digestive system
L20	Atopic dermatitis	Women	1.14802	0.210094	0.736243	1.5598	0.511162	0.734795	Diseases of the skin and subcutaneous tissue
L40	Psoriasis	Women	1.27247	0.209608	0.861646	1.68329	0.250319	0.523394	Diseases of the skin and subcutaneous tissue
L71	Rosacea	Women	0.906744	0.336504	0.247208	1.56628	0.771114	0.878882	Diseases of the skin and subcutaneous tissue
M12	Other and unspecified arthropathy	Women	1.03708	0.217005	0.611761	1.46241	0.866743	0.927214	Diseases of the musculoskeletal system and connective tissue
M13	Other arthritis	Women	1.06316	0.255885	0.561631	1.56468	0.810848	0.898771	Diseases of the musculoskeletal system and connective tissue
M15	Polyosteoarthritis	Women	1.0997	0.316277	0.479804	1.71959	0.763815	0.878882	Diseases of the musculoskeletal system and connective tissue
M16	Osteoarthritis of hip	Women	1.11556	0.326152	0.476313	1.75481	0.737404	0.878882	Diseases of the musculoskeletal system and connective tissue
M17	Osteoarthritis of knee	Women	1.26556	0.19033	0.892521	1.6386	0.215936	0.484539	Diseases of the musculoskeletal system and connective tissue
M18	Osteoarthritis of first carpometacarpal joint	Women	1.25581	0.247094	0.771514	1.7401	0.356614	0.608849	Diseases of the musculoskeletal system and connective tissue
M19	Other and unspecified osteoarthritis	Women	1.05178	0.182794	0.693515	1.41005	0.782391	0.878882	Diseases of the musculoskeletal system and connective tissue
M20	Acquired deformities of fingers and toes	Women	1.06213	0.162663	0.743318	1.38094	0.71096	0.878882	Diseases of the musculoskeletal system and connective tissue
M22	Disorder of patella	Women	1.24989	0.232756	0.793697	1.70608	0.3379	0.602886	Diseases of the musculoskeletal system and connective tissue
M23	Internal derangement of knee	Women	1.37201	0.16012	1.05818	1.68584	0.0482382	0.198083	Diseases of the musculoskeletal system and connective tissue
M41	Scoliosis	Women	1.15885	0.211814	0.743708	1.574	0.486399	0.721753	Diseases of the musculoskeletal system and connective tissue
M47	Spondylosis	Women	1.2155	0.204855	0.813994	1.61701	0.340762	0.602886	Diseases of the musculoskeletal system and connective tissue
M50	Cervical disc disorders	Women	1.21343	0.246788	0.729734	1.69713	0.433113	0.675363	Diseases of the musculoskeletal system and connective tissue
M51	Thoracic, thoracolum, and lumbosacral intvrt disc disorders	Women	1.72058	0.1372	1.45167	1.98948	7.64558e-05	0.00100485	Diseases of the musculoskeletal system and connective tissue
M81	Osteoporosis without current pathological fracture	Women	0.784033	0.210253	0.371944	1.19612	0.247192	0.523394	Diseases of the musculoskeletal system and connective tissue
N39	Other disorders of urinary system	Women	2.29577	0.198717	1.90629	2.68525	2.88735e-05	0.000531273	Diseases of the genitourinary system
N60	Benign mammary dysplasia	Women	1.21936	0.164654	0.896642	1.54207	0.228401	0.500306	Diseases of the genitourinary system
N80	Endometriosis	Women	1.60287	0.236449	1.13944	2.0663	0.0460068	0.198083	Diseases of the genitourinary system
N81	Female genital prolapse	Women	1.13517	0.249323	0.64651	1.62384	0.611089	0.813188	Diseases of the genitourinary system
N91	Absent, scanty and rare menstruation	Women	1.50596	0.176979	1.15908	1.85283	0.0206988	0.112017	Diseases of the genitourinary system
N92	Excessive, frequent and irregular menstruation	Women	1.21869	0.108	1.00702	1.43037	0.0670566	0.219154	Diseases of the genitourinary system
N93	Other abnormal uterine and vaginal bleeding	Women	1.57651	0.267971	1.05129	2.10172	0.0893703	0.249154	Diseases of the genitourinary system
N94	Pain and oth cond assoc w fem gntl org and menstrual cycle	Women	1.6231	0.192428	1.24595	2.00025	0.0118366	0.0777836	Diseases of the genitourinary system
N95	Menopausal and other perimenopausal disorders	Women	0.994729	0.120813	0.75794	1.23152	0.965106	0.986029	Diseases of the genitourinary system
N97	Female infertility	Women	1.53808	0.224719	1.09764	1.97853	0.0553788	0.199697	Diseases of the genitourinary system
O99	Oth maternal diseases classd elsw but compl preg/chldbrth	Women	0.850529	0.365937	0.133305	1.56775	0.658187	0.852862	Pregnancy, childbirth and the puerperium
Q40	Other congenital malformations of upper alimentary tract	Women	1.78661	0.281637	1.23461	2.33861	0.0393481	0.181001	Congenital malformations, deformations and chromosomal abnormalities
R32	Unspecified urinary incontinence	Women	1.37933	0.188582	1.00972	1.74895	0.088126	0.249154	Symptoms, signs and abnormal clinical and laboratory findings, not elsewhere classified
Z96	Presence of other functional implants	Women	1.31934	0.343831	0.645447	1.99324	0.420232	0.675363	Factors influencing health status and contact with health services
C61	Malignant neoplasm of prostate	Men	0.942381	0.637093	-0.306298	2.19106	0.925784	0.94983	Neoplasms
D69	Purpura and other hemorrhagic conditions	Men	0.78402	0.669652	-0.528474	2.09651	0.716341	0.873763	Diseases of the blood and blood-forming organs and certain disorders involving the immune mechanism
D70	Neutropenia	Men	0.639115	0.727556	-0.786869	2.0651	0.538351	0.872565	Diseases of the blood and blood-forming organs and certain disorders involving the immune mechanism
D72	Other disorders of white blood cells	Men	2.17414	0.467622	1.25762	3.09067	0.0967503	0.509552	Diseases of the blood and blood-forming organs and certain disorders involving the immune mechanism
E02	Subclinical iodine-deficiency hypothyroidism	Men	2.1419	0.488177	1.18509	3.09871	0.118694	0.578847	Endocrine, nutritional and metabolic diseases
E03	Other hypothyroidism	Men	1.17184	0.410519	0.367239	1.97645	0.699286	0.873763	Endocrine, nutritional and metabolic diseases
E04	Other nontoxic goiter	Men	1.19547	0.607172	0.00543859	2.38551	0.768715	0.873763	Endocrine, nutritional and metabolic diseases
E11	Type 2 diabetes mellitus	Men	1.09528	0.275685	0.554944	1.63561	0.741318	0.873763	Endocrine, nutritional and metabolic diseases
E55	Vitamin D deficiency	Men	0.768949	0.529615	-0.269077	1.80698	0.619839	0.873763	Endocrine, nutritional and metabolic diseases
E66	Overweight and obesity	Men	1.15433	0.154099	0.852304	1.45636	0.351664	0.771707	Endocrine, nutritional and metabolic diseases
E78	Disorders of lipoprotein metabolism and other lipidemias	Men	1.26098	0.138548	0.989432	1.53253	0.0941859	0.509552	Endocrine, nutritional and metabolic diseases
E80	Disorders of porphyrin and bilirubin metabolism	Men	1.74785	0.507279	0.753605	2.7421	0.271004	0.705274	Endocrine, nutritional and metabolic diseases
F10	Alcohol related disorders	Men	1.26007	0.346948	0.580061	1.94007	0.505231	0.872565	Mental, Behavioral and Neurodevelopmental disorders
F17	Nicotine dependence	Men	1.16842	0.150001	0.87442	1.46241	0.299432	0.735655	Mental, Behavioral and Neurodevelopmental disorders
F18	Inhalant related disorders	Men	0.978294	0.345069	0.301972	1.65462	0.949292	0.961462	Mental, Behavioral and Neurodevelopmental disorders
F32	Major depressive disorder, single episode	Men	1.40564	0.236666	0.94178	1.86949	0.150236	0.578847	Mental, Behavioral and Neurodevelopmental disorders
F33	Major depressive disorder, recurrent	Men	1.48647	0.522408	0.462572	2.51037	0.447969	0.823013	Mental, Behavioral and Neurodevelopmental disorders
F34	Persistent mood [affective] disorders	Men	0.898221	0.332201	0.24712	1.54932	0.746609	0.873763	Mental, Behavioral and Neurodevelopmental disorders
F39	Unspecified mood [affective] disorder	Men	1.48975	0.326586	0.849653	2.12985	0.222264	0.664285	Mental, Behavioral and Neurodevelopmental disorders
F40	Phobic anxiety disorders	Men	0.878126	0.600716	-0.299255	2.05551	0.828714	0.884709	Mental, Behavioral and Neurodevelopmental disorders
F41	Other anxiety disorders	Men	1.49045	0.146774	1.20278	1.77812	0.00654823	0.0862184	Mental, Behavioral and Neurodevelopmental disorders
F43	Reaction to severe stress, and adjustment disorders	Men	1.14132	0.283488	0.585693	1.69694	0.641016	0.873763	Mental, Behavioral and Neurodevelopmental disorders
F51	Sleep disorders not due to a substance or known physiol cond	Men	2.10604	0.221077	1.67274	2.53935	0.000754411	0.0198662	Mental, Behavioral and Neurodevelopmental disorders
F52	Sexual dysfnct not due to a substance or known physiol cond	Men	1.25222	0.277444	0.708444	1.796	0.417543	0.823013	Mental, Behavioral and Neurodevelopmental disorders
F60	Specific personality disorders	Men	0.752161	0.624756	-0.472338	1.97666	0.648486	0.873763	Mental, Behavioral and Neurodevelopmental disorders
G43	Migraine	Men	1.42417	0.30827	0.819976	2.02837	0.251373	0.684774	Diseases of the nervous system
G44	Other headache syndromes	Men	2.81327	0.30119	2.22295	3.40359	0.000594299	0.0198662	Diseases of the nervous system
G47	Sleep disorders	Men	1.39903	0.227652	0.952838	1.84522	0.140223	0.578847	Diseases of the nervous system
G56	Mononeuropathies of upper limb	Men	1.46641	0.290692	0.896664	2.03616	0.187867	0.664285	Diseases of the nervous system
G57	Mononeuropathies of lower limb	Men	1.96599	0.442966	1.09779	2.83419	0.126993	0.578847	Diseases of the nervous system
H25	Age-related cataract	Men	0.677182	0.598088	-0.495049	1.84941	0.514551	0.872565	Diseases of the eye and adnexa
H26	Other cataract	Men	1.77292	0.482639	0.826968	2.71888	0.235443	0.664285	Diseases of the eye and adnexa
H40	Glaucoma	Men	0.870686	0.376385	0.132984	1.60839	0.712944	0.873763	Diseases of the eye and adnexa
H43	Disorders of vitreous body	Men	2.09387	0.432866	1.24547	2.94227	0.0877744	0.509552	Diseases of the eye and adnexa
H54	Blindness and low vision	Men	1.06737	0.267453	0.543173	1.59157	0.807401	0.873763	Diseases of the eye and adnexa
H60	Otitis externa	Men	1.11412	0.225426	0.672288	1.55594	0.63168	0.873763	Diseases of the ear and mastoid process
H65	Nonsuppurative otitis media	Men	0.844422	0.531653	-0.197599	1.88644	0.750432	0.873763	Diseases of the ear and mastoid process
H90	Conductive and sensorineural hearing loss	Men	0.870878	0.565195	-0.236884	1.97864	0.806757	0.873763	Diseases of the ear and mastoid process
H91	Other and unspecified hearing loss	Men	1.29423	0.213374	0.876027	1.71244	0.226755	0.664285	Diseases of the ear and mastoid process
I10	Essential (primary) hypertension	Men	1.09478	0.151777	0.797306	1.39226	0.550747	0.872565	Diseases of the circulatory system
I25	Chronic ischemic heart disease	Men	1.76929	0.480022	0.828467	2.71012	0.234576	0.664285	Diseases of the circulatory system
I44	Atrioventricular and left bundle-branch block	Men	1.96527	0.463543	1.05674	2.87379	0.14497	0.578847	Diseases of the circulatory system
I45	Other conduction disorders	Men	1.42244	0.345155	0.745945	2.09893	0.307299	0.735655	Diseases of the circulatory system
I48	Atrial fibrillation and flutter	Men	1.17507	0.548561	0.0999124	2.25023	0.768685	0.873763	Diseases of the circulatory system
I49	Other cardiac arrhythmias	Men	1.31143	0.351922	0.621675	2.00118	0.441068	0.823013	Diseases of the circulatory system
I51	Complications and ill-defined descriptions of heart disease	Men	1.18418	0.526772	0.151723	2.21663	0.748276	0.873763	Diseases of the circulatory system
J30	Vasomotor and allergic rhinitis	Men	0.95514	0.186717	0.589181	1.3211	0.805828	0.873763	Diseases of the respiratory system
J31	Chronic rhinitis, nasopharyngitis and pharyngitis	Men	2.66181	0.383886	1.9094	3.41421	0.0107645	0.101804	Diseases of the respiratory system
J44	Other chronic obstructive pulmonary disease	Men	1.83252	0.424752	1.00002	2.66502	0.153871	0.578847	Diseases of the respiratory system
J45	Asthma	Men	1.63862	0.234256	1.17948	2.09775	0.0350161	0.276628	Diseases of the respiratory system
K05	Gingivitis and periodontal diseases	Men	1.43854	0.467256	0.522736	2.35435	0.436437	0.823013	Diseases of the digestive system
K08	Other disorders of teeth and supporting structures	Men	1.47816	0.497212	0.503641	2.45268	0.431881	0.823013	Diseases of the digestive system
K21	Gastro-esophageal reflux disease	Men	1.51133	0.231287	1.05801	1.96464	0.0741624	0.488236	Diseases of the digestive system
K26	Duodenal ulcer	Men	3.19624	0.399449	2.41334	3.97915	0.00362644	0.070167	Diseases of the digestive system
K29	Gastritis and duodenitis	Men	2.22494	0.390181	1.4602	2.98968	0.0403995	0.290142	Diseases of the digestive system
K57	Diverticular disease of intestine	Men	1.49899	0.318262	0.875206	2.12277	0.203417	0.664285	Diseases of the digestive system
K58	Irritable bowel syndrome	Men	1.41274	0.476087	0.479628	2.34585	0.467977	0.840232	Diseases of the digestive system
K76	Other diseases of liver	Men	0.953541	0.276334	0.411937	1.49514	0.863313	0.909356	Diseases of the digestive system
L20	Atopic dermatitis	Men	0.642784	0.463524	-0.265707	1.55127	0.340362	0.771707	Diseases of the skin and subcutaneous tissue
L40	Psoriasis	Men	1.08692	0.33453	0.431254	1.74259	0.803245	0.873763	Diseases of the skin and subcutaneous tissue
M10	Gout	Men	0.888539	0.370054	0.163246	1.61383	0.74946	0.873763	Diseases of the musculoskeletal system and connective tissue
M12	Other and unspecified arthropathy	Men	0.984799	0.389756	0.220891	1.74871	0.96865	0.96865	Diseases of the musculoskeletal system and connective tissue
M13	Other arthritis	Men	0.786419	0.513775	-0.220561	1.7934	0.640036	0.873763	Diseases of the musculoskeletal system and connective tissue
M16	Osteoarthritis of hip	Men	1.27246	0.377364	0.532837	2.01208	0.523143	0.872565	Diseases of the musculoskeletal system and connective tissue
M17	Osteoarthritis of knee	Men	0.888699	0.36432	0.174645	1.60275	0.746026	0.873763	Diseases of the musculoskeletal system and connective tissue
M18	Osteoarthritis of first carpometacarpal joint	Men	2.95879	0.429762	2.11648	3.80111	0.011598	0.101804	Diseases of the musculoskeletal system and connective tissue
M19	Other and unspecified osteoarthritis	Men	1.24406	0.367401	0.523963	1.96415	0.552256	0.872565	Diseases of the musculoskeletal system and connective tissue
M20	Acquired deformities of fingers and toes	Men	1.57901	0.367047	0.859615	2.29841	0.213305	0.664285	Diseases of the musculoskeletal system and connective tissue
M22	Disorder of patella	Men	0.689132	0.464196	-0.220676	1.59894	0.422507	0.823013	Diseases of the musculoskeletal system and connective tissue
M23	Internal derangement of knee	Men	1.20626	0.206761	0.801021	1.61151	0.364416	0.778078	Diseases of the musculoskeletal system and connective tissue
M41	Scoliosis	Men	1.27283	0.433747	0.4227	2.12296	0.578088	0.873763	Diseases of the musculoskeletal system and connective tissue
M47	Spondylosis	Men	2.94267	0.279972	2.39394	3.49141	0.000115687	0.00913925	Diseases of the musculoskeletal system and connective tissue
M50	Cervical disc disorders	Men	2.93903	0.378936	2.19633	3.68173	0.00444095	0.070167	Diseases of the musculoskeletal system and connective tissue
M51	Thoracic, thoracolum, and lumbosacral intvrt disc disorders	Men	1.70677	0.205307	1.30437	2.10916	0.00921685	0.101804	Diseases of the musculoskeletal system and connective tissue
N18	Chronic kidney disease (CKD)	Men	0.49375	0.757069	-0.990078	1.97758	0.351242	0.771707	Diseases of the genitourinary system
N40	Enlarged prostate	Men	0.92538	0.209437	0.51489	1.33587	0.711171	0.873763	Diseases of the genitourinary system
N48	Other disorders of penis	Men	0.950532	0.418309	0.130662	1.7704	0.903467	0.93913	Diseases of the genitourinary system
Q40	Other congenital malformations of upper alimentary tract	Men	1.11677	0.433422	0.267281	1.96626	0.798865	0.873763	Congenital malformations, deformations and chromosomal abnormalities
Z96	Presence of other functional implants	Men	1.68589	0.480205	0.744702	2.62707	0.276753	0.705274	Factors influencing health status and contact with health services

## Sheet: Sup Table S9
Table S9. Results of the association between disease trajectories and long COVID correcting by COVID-19 hospitalisation in aggregated (Both) and sex-stratified analysis (Women and Men). Each trajectory consists in a first disease and a second disease.
Trajectory first ICD	Description first	Trajectory second ICD	Description second	Analysis	OR	SE	CI 95% lower	CI 95% upper	p-value	Adjusted p-value	Chapter first	Chapter second	Cluster
F17	Nicotine dependence	F41	Other anxiety disorders	Both	1.37669	0.133999	1.11405	1.63932	0.0170472	0.0644006	Mental, Behavioral and Neurodevelopmental disorders	Mental, Behavioral and Neurodevelopmental disorders	MHNM
E78	Disorders of lipoprotein metabolism and other lipidemias	I10	Essential (primary) hypertension	Both	1.23094	0.165775	0.906027	1.55585	0.210069	0.357117	Endocrine, nutritional and metabolic diseases	Diseases of the circulatory system	CMD
I10	Essential (primary) hypertension	E66	Overweight and obesity	Both	1.19477	0.164896	0.871577	1.51796	0.28051	0.407708	Diseases of the circulatory system	Endocrine, nutritional and metabolic diseases	CMD
E78	Disorders of lipoprotein metabolism and other lipidemias	E66	Overweight and obesity	Both	1.17005	0.163041	0.85049	1.4896	0.335444	0.456203	Endocrine, nutritional and metabolic diseases	Endocrine, nutritional and metabolic diseases	CMD
F32	Major depressive disorder, single episode	F39	Unspecified mood [affective] disorder	Both	1.39319	0.143172	1.11258	1.6738	0.0205541	0.0727329	Mental, Behavioral and Neurodevelopmental disorders	Mental, Behavioral and Neurodevelopmental disorders	MHNM
I10	Essential (primary) hypertension	E78	Disorders of lipoprotein metabolism and other lipidemias	Both	1.6926	0.154611	1.38957	1.99563	0.000664573	0.00874634	Diseases of the circulatory system	Endocrine, nutritional and metabolic diseases	CMD
F41	Other anxiety disorders	F34	Persistent mood [affective] disorders	Both	1.15073	0.16214	0.832945	1.46852	0.386535	0.505469	Mental, Behavioral and Neurodevelopmental disorders	Mental, Behavioral and Neurodevelopmental disorders	MHNM
E66	Overweight and obesity	E78	Disorders of lipoprotein metabolism and other lipidemias	Both	1.48716	0.165797	1.1622	1.81211	0.0166802	0.0644006	Endocrine, nutritional and metabolic diseases	Endocrine, nutritional and metabolic diseases	CMD
E66	Overweight and obesity	I10	Essential (primary) hypertension	Both	1.27517	0.175416	0.931358	1.61898	0.165833	0.30291	Endocrine, nutritional and metabolic diseases	Diseases of the circulatory system	CMD
F41	Other anxiety disorders	F32	Major depressive disorder, single episode	Both	1.47615	0.158404	1.16568	1.78661	0.0139517	0.0592948	Mental, Behavioral and Neurodevelopmental disorders	Mental, Behavioral and Neurodevelopmental disorders	MHNM
F17	Nicotine dependence	F18	Inhalant related disorders	Both	1.08574	0.187475	0.7183	1.45319	0.660801	0.761601	Mental, Behavioral and Neurodevelopmental disorders	Mental, Behavioral and Neurodevelopmental disorders	MHNM
F41	Other anxiety disorders	F43	Reaction to severe stress, and adjustment disorders	Both	1.22135	0.178715	0.871074	1.57162	0.263202	0.401683	Mental, Behavioral and Neurodevelopmental disorders	Mental, Behavioral and Neurodevelopmental disorders	MHNM
F41	Other anxiety disorders	F17	Nicotine dependence	Both	0.96083	0.194277	0.580055	1.34161	0.837045	0.918049	Mental, Behavioral and Neurodevelopmental disorders	Mental, Behavioral and Neurodevelopmental disorders	MHNM
F32	Major depressive disorder, single episode	F41	Other anxiety disorders	Both	1.48287	0.18772	1.11495	1.8508	0.0358372	0.105954	Mental, Behavioral and Neurodevelopmental disorders	Mental, Behavioral and Neurodevelopmental disorders	MHNM
F41	Other anxiety disorders	F51	Sleep disorders not due to a substance or known physiol cond	Both	1.18257	0.204866	0.781036	1.5841	0.413061	0.529965	Mental, Behavioral and Neurodevelopmental disorders	Mental, Behavioral and Neurodevelopmental disorders	MHNM
F17	Nicotine dependence	F32	Major depressive disorder, single episode	Both	1.23598	0.204464	0.835242	1.63673	0.300105	0.425148	Mental, Behavioral and Neurodevelopmental disorders	Mental, Behavioral and Neurodevelopmental disorders	MHNM
F41	Other anxiety disorders	F39	Unspecified mood [affective] disorder	Both	1.40028	0.203467	1.0015	1.79907	0.0979867	0.214939	Mental, Behavioral and Neurodevelopmental disorders	Mental, Behavioral and Neurodevelopmental disorders	MHNM
E78	Disorders of lipoprotein metabolism and other lipidemias	H91	Other and unspecified hearing loss	Both	1.51821	0.226849	1.07359	1.96282	0.0656869	0.165434	Endocrine, nutritional and metabolic diseases	Diseases of the ear and mastoid process	CMD - MHNM
G43	Migraine	F41	Other anxiety disorders	Both	1.78313	0.192734	1.40537	2.16088	0.00269222	0.0166428	Diseases of the nervous system	Mental, Behavioral and Neurodevelopmental disorders	MHNM
E02	Subclinical iodine-deficiency hypothyroidism	E03	Other hypothyroidism	Both	1.02145	0.228524	0.573553	1.46935	0.926001	0.961866	Endocrine, nutritional and metabolic diseases	Endocrine, nutritional and metabolic diseases	CMD
F41	Other anxiety disorders	G56	Mononeuropathies of upper limb	Both	1.78546	0.198161	1.39707	2.17385	0.00344145	0.0195015	Mental, Behavioral and Neurodevelopmental disorders	Diseases of the nervous system	MHNM
E78	Disorders of lipoprotein metabolism and other lipidemias	K21	Gastro-esophageal reflux disease	Both	2.02427	0.212864	1.60706	2.44148	0.000923168	0.00896791	Endocrine, nutritional and metabolic diseases	Diseases of the digestive system	CMD
F41	Other anxiety disorders	M51	Thoracic, thoracolum, and lumbosacral intvrt disc disorders	Both	2.21952	0.192471	1.84229	2.59676	3.43687e-05	0.00116854	Mental, Behavioral and Neurodevelopmental disorders	Diseases of the musculoskeletal system and connective tissue	MHNM
E78	Disorders of lipoprotein metabolism and other lipidemias	K76	Other diseases of liver	Both	1.60326	0.228681	1.15505	2.05147	0.0390007	0.110502	Endocrine, nutritional and metabolic diseases	Diseases of the digestive system	CMD
F41	Other anxiety disorders	K21	Gastro-esophageal reflux disease	Both	2.11839	0.201139	1.72417	2.51262	0.00018993	0.00430508	Mental, Behavioral and Neurodevelopmental disorders	Diseases of the digestive system	MHNM - CMD
F32	Major depressive disorder, single episode	E66	Overweight and obesity	Both	1.32788	0.232009	0.873147	1.78261	0.2216	0.364104	Mental, Behavioral and Neurodevelopmental disorders	Endocrine, nutritional and metabolic diseases	MHNM - CMD
F41	Other anxiety disorders	G43	Migraine	Both	2.22577	0.192319	1.84883	2.60271	3.17848e-05	0.00116854	Mental, Behavioral and Neurodevelopmental disorders	Diseases of the nervous system	MHNM
E66	Overweight and obesity	K76	Other diseases of liver	Both	1.04383	0.259364	0.535489	1.55218	0.868625	0.937564	Endocrine, nutritional and metabolic diseases	Diseases of the digestive system	CMD
F32	Major depressive disorder, single episode	F34	Persistent mood [affective] disorders	Both	1.4443	0.230834	0.991877	1.89673	0.111249	0.230019	Mental, Behavioral and Neurodevelopmental disorders	Mental, Behavioral and Neurodevelopmental disorders	MHNM
F17	Nicotine dependence	F34	Persistent mood [affective] disorders	Both	0.986997	0.258531	0.480286	1.49371	0.959625	0.973948	Mental, Behavioral and Neurodevelopmental disorders	Mental, Behavioral and Neurodevelopmental disorders	MHNM
I10	Essential (primary) hypertension	E11	Type 2 diabetes mellitus	Both	1.38934	0.270948	0.858295	1.92039	0.224888	0.364104	Diseases of the circulatory system	Endocrine, nutritional and metabolic diseases	CMD
E66	Overweight and obesity	G47	Sleep disorders	Both	1.28436	0.266529	0.761978	1.80675	0.347743	0.463657	Endocrine, nutritional and metabolic diseases	Diseases of the nervous system	CMD - MHNM
E66	Overweight and obesity	F32	Major depressive disorder, single episode	Both	1.45165	0.234848	0.991358	1.91194	0.112514	0.230019	Endocrine, nutritional and metabolic diseases	Mental, Behavioral and Neurodevelopmental disorders	CMD - MHNM
E78	Disorders of lipoprotein metabolism and other lipidemias	E11	Type 2 diabetes mellitus	Both	1.46401	0.277314	0.920485	2.00753	0.169273	0.30291	Endocrine, nutritional and metabolic diseases	Endocrine, nutritional and metabolic diseases	CMD
E78	Disorders of lipoprotein metabolism and other lipidemias	G47	Sleep disorders	Both	1.50037	0.274052	0.96324	2.0375	0.13876	0.262102	Endocrine, nutritional and metabolic diseases	Diseases of the nervous system	CMD - MHNM
E66	Overweight and obesity	H60	Otitis externa	Both	1.73295	0.238951	1.26461	2.20129	0.021392	0.0727329	Endocrine, nutritional and metabolic diseases	Diseases of the ear and mastoid process	CMD - MHNM
E78	Disorders of lipoprotein metabolism and other lipidemias	M17	Osteoarthritis of knee	Both	1.3609	0.276925	0.818136	1.90366	0.26582	0.401683	Endocrine, nutritional and metabolic diseases	Diseases of the musculoskeletal system and connective tissue	CMD - MHNM
E78	Disorders of lipoprotein metabolism and other lipidemias	M19	Other and unspecified osteoarthritis	Both	1.22755	0.278385	0.681927	1.77318	0.461446	0.58108	Endocrine, nutritional and metabolic diseases	Diseases of the musculoskeletal system and connective tissue	CMD - MHNM
E78	Disorders of lipoprotein metabolism and other lipidemias	E55	Vitamin D deficiency	Both	1.88493	0.240061	1.41442	2.35544	0.00827714	0.037523	Endocrine, nutritional and metabolic diseases	Endocrine, nutritional and metabolic diseases	CMD
E66	Overweight and obesity	G56	Mononeuropathies of upper limb	Both	2.06473	0.227732	1.61838	2.51107	0.00145481	0.0109919	Endocrine, nutritional and metabolic diseases	Diseases of the nervous system	CMD - MHNM
J45	Asthma	J30	Vasomotor and allergic rhinitis	Both	2.15998	0.22901	1.71113	2.60883	0.000771736	0.00874634	Diseases of the respiratory system	Diseases of the respiratory system	RESP
F43	Reaction to severe stress, and adjustment disorders	F41	Other anxiety disorders	Both	1.87436	0.234723	1.41432	2.33441	0.00743633	0.0361193	Mental, Behavioral and Neurodevelopmental disorders	Mental, Behavioral and Neurodevelopmental disorders	MHNM
E66	Overweight and obesity	E11	Type 2 diabetes mellitus	Both	1.1045	0.302481	0.511647	1.69735	0.742469	0.82767	Endocrine, nutritional and metabolic diseases	Endocrine, nutritional and metabolic diseases	CMD
E66	Overweight and obesity	K21	Gastro-esophageal reflux disease	Both	2.16418	0.240942	1.69194	2.63642	0.00135406	0.0109919	Endocrine, nutritional and metabolic diseases	Diseases of the digestive system	CMD
I10	Essential (primary) hypertension	K21	Gastro-esophageal reflux disease	Both	2.05532	0.256331	1.55292	2.55772	0.00494568	0.0258697	Diseases of the circulatory system	Diseases of the digestive system	CMD
J30	Vasomotor and allergic rhinitis	J45	Asthma	Both	2.27773	0.231816	1.82338	2.73208	0.000383772	0.00652412	Diseases of the respiratory system	Diseases of the respiratory system	RESP
F17	Nicotine dependence	K76	Other diseases of liver	Both	1.57934	0.266351	1.0573	2.10138	0.0861975	0.202118	Mental, Behavioral and Neurodevelopmental disorders	Diseases of the digestive system	MHNM - CMD
E66	Overweight and obesity	M17	Osteoarthritis of knee	Both	1.57816	0.272011	1.04503	2.11129	0.0934713	0.211868	Endocrine, nutritional and metabolic diseases	Diseases of the musculoskeletal system and connective tissue	CMD - MHNM
I10	Essential (primary) hypertension	K76	Other diseases of liver	Both	1.38238	0.288343	0.817237	1.94752	0.261443	0.401683	Diseases of the circulatory system	Diseases of the digestive system	CMD
F41	Other anxiety disorders	G44	Other headache syndromes	Both	1.13722	0.275576	0.597101	1.67734	0.640777	0.761601	Mental, Behavioral and Neurodevelopmental disorders	Diseases of the nervous system	MHNM
F32	Major depressive disorder, single episode	F43	Reaction to severe stress, and adjustment disorders	Both	1.74688	0.247424	1.26194	2.23183	0.0241607	0.0782347	Mental, Behavioral and Neurodevelopmental disorders	Mental, Behavioral and Neurodevelopmental disorders	MHNM
F17	Nicotine dependence	G47	Sleep disorders	Both	0.857901	0.343669	0.184322	1.53148	0.655617	0.761601	Mental, Behavioral and Neurodevelopmental disorders	Diseases of the nervous system	MHNM
I10	Essential (primary) hypertension	G47	Sleep disorders	Both	1.85682	0.284951	1.29832	2.41531	0.0298692	0.0923231	Diseases of the circulatory system	Diseases of the nervous system	CMD - MHNM
E03	Other hypothyroidism	E66	Overweight and obesity	Both	1.18646	0.280127	0.637426	1.7355	0.541624	0.657686	Endocrine, nutritional and metabolic diseases	Endocrine, nutritional and metabolic diseases	CMD
F51	Sleep disorders not due to a substance or known physiol cond	F41	Other anxiety disorders	Both	1.00665	0.310677	0.397729	1.61556	0.98299	0.98299	Mental, Behavioral and Neurodevelopmental disorders	Mental, Behavioral and Neurodevelopmental disorders	MHNM
J45	Asthma	E66	Overweight and obesity	Both	1.65196	0.269423	1.1239	2.18002	0.0624471	0.165434	Diseases of the respiratory system	Endocrine, nutritional and metabolic diseases	RESP - CMD
F32	Major depressive disorder, single episode	F51	Sleep disorders not due to a substance or known physiol cond	Both	1.51962	0.274937	0.980749	2.05848	0.128006	0.248698	Mental, Behavioral and Neurodevelopmental disorders	Mental, Behavioral and Neurodevelopmental disorders	MHNM
E78	Disorders of lipoprotein metabolism and other lipidemias	K57	Diverticular disease of intestine	Both	0.971041	0.352582	0.279993	1.66209	0.933576	0.961866	Endocrine, nutritional and metabolic diseases	Diseases of the digestive system	CMD
E66	Overweight and obesity	F34	Persistent mood [affective] disorders	Both	1.32923	0.294838	0.751362	1.90711	0.334402	0.456203	Endocrine, nutritional and metabolic diseases	Mental, Behavioral and Neurodevelopmental disorders	CMD - MHNM
H60	Otitis externa	E66	Overweight and obesity	Both	1.67733	0.278555	1.13137	2.22329	0.0633496	0.165434	Diseases of the ear and mastoid process	Endocrine, nutritional and metabolic diseases	MHNM - CMD
M13	Other arthritis	M12	Other and unspecified arthropathy	Both	1.11219	0.318063	0.488799	1.73558	0.738145	0.82767	Diseases of the musculoskeletal system and connective tissue	Diseases of the musculoskeletal system and connective tissue	MHNM
E11	Type 2 diabetes mellitus	E66	Overweight and obesity	Both	0.75263	0.413913	-0.0586246	1.56389	0.492353	0.608727	Endocrine, nutritional and metabolic diseases	Endocrine, nutritional and metabolic diseases	CMD
G56	Mononeuropathies of upper limb	F41	Other anxiety disorders	Both	1.36573	0.289594	0.798133	1.93332	0.281798	0.407708	Diseases of the nervous system	Mental, Behavioral and Neurodevelopmental disorders	MHNM
F17	Nicotine dependence	M12	Other and unspecified arthropathy	Both	0.952357	0.340085	0.285801	1.61891	0.885864	0.941231	Mental, Behavioral and Neurodevelopmental disorders	Diseases of the musculoskeletal system and connective tissue	MHNM
E66	Overweight and obesity	E03	Other hypothyroidism	Both	1.54668	0.276708	1.00434	2.08902	0.11501	0.230019	Endocrine, nutritional and metabolic diseases	Endocrine, nutritional and metabolic diseases	CMD
E78	Disorders of lipoprotein metabolism and other lipidemias	M47	Spondylosis	Both	2.30448	0.274685	1.7661	2.84285	0.00237123	0.0161244	Endocrine, nutritional and metabolic diseases	Diseases of the musculoskeletal system and connective tissue	CMD - MHNM
H91	Other and unspecified hearing loss	E78	Disorders of lipoprotein metabolism and other lipidemias	Both	1.52324	0.310263	0.915137	2.13134	0.174972	0.30508	Diseases of the ear and mastoid process	Endocrine, nutritional and metabolic diseases	MHNM - CMD
E66	Overweight and obesity	F39	Unspecified mood [affective] disorder	Both	1.63462	0.2808	1.08426	2.18497	0.0801131	0.19456	Endocrine, nutritional and metabolic diseases	Mental, Behavioral and Neurodevelopmental disorders	CMD - MHNM
F17	Nicotine dependence	F41	Other anxiety disorders	Women	1.22396	0.157237	0.91578	1.53214	0.1987	0.337177	Mental, Behavioral and Neurodevelopmental disorders	Mental, Behavioral and Neurodevelopmental disorders	MHNM
F32	Major depressive disorder, single episode	F39	Unspecified mood [affective] disorder	Women	1.40165	0.157216	1.09351	1.70978	0.0317401	0.107402	Mental, Behavioral and Neurodevelopmental disorders	Mental, Behavioral and Neurodevelopmental disorders	MHNM
F41	Other anxiety disorders	E66	Overweight and obesity	Women	1.2946	0.168499	0.964352	1.62485	0.125428	0.252846	Mental, Behavioral and Neurodevelopmental disorders	Endocrine, nutritional and metabolic diseases	MHNM - CMD
F41	Other anxiety disorders	F34	Persistent mood [affective] disorders	Women	1.18619	0.177151	0.838983	1.5334	0.335116	0.4782	Mental, Behavioral and Neurodevelopmental disorders	Mental, Behavioral and Neurodevelopmental disorders	MHNM
F41	Other anxiety disorders	N92	Excessive, frequent and irregular menstruation	Women	1.74997	0.161337	1.43375	2.06618	0.000523388	0.00599547	Mental, Behavioral and Neurodevelopmental disorders	Diseases of the genitourinary system	MHNM
F41	Other anxiety disorders	F32	Major depressive disorder, single episode	Women	1.52923	0.173604	1.18897	1.86948	0.0144158	0.0631314	Mental, Behavioral and Neurodevelopmental disorders	Mental, Behavioral and Neurodevelopmental disorders	MHNM
F41	Other anxiety disorders	F43	Reaction to severe stress, and adjustment disorders	Women	1.29545	0.190872	0.921352	1.66956	0.175034	0.331782	Mental, Behavioral and Neurodevelopmental disorders	Mental, Behavioral and Neurodevelopmental disorders	MHNM
F41	Other anxiety disorders	F17	Nicotine dependence	Women	1.07146	0.206111	0.667492	1.47543	0.737709	0.821834	Mental, Behavioral and Neurodevelopmental disorders	Mental, Behavioral and Neurodevelopmental disorders	MHNM
E78	Disorders of lipoprotein metabolism and other lipidemias	E66	Overweight and obesity	Women	1.27496	0.206372	0.870478	1.67944	0.239168	0.374991	Endocrine, nutritional and metabolic diseases	Endocrine, nutritional and metabolic diseases	CMD
E66	Overweight and obesity	F41	Other anxiety disorders	Women	1.88529	0.183943	1.52477	2.24581	0.000566501	0.00599547	Endocrine, nutritional and metabolic diseases	Mental, Behavioral and Neurodevelopmental disorders	CMD - MHNM
E78	Disorders of lipoprotein metabolism and other lipidemias	N95	Menopausal and other perimenopausal disorders	Women	1.06633	0.225681	0.623998	1.50865	0.775987	0.842311	Endocrine, nutritional and metabolic diseases	Diseases of the genitourinary system	CMD - MHNM
I10	Essential (primary) hypertension	E66	Overweight and obesity	Women	1.26008	0.216258	0.836224	1.68394	0.285077	0.420985	Diseases of the circulatory system	Endocrine, nutritional and metabolic diseases	CMD
F32	Major depressive disorder, single episode	F41	Other anxiety disorders	Women	1.57986	0.199252	1.18933	1.97039	0.0217176	0.0889721	Mental, Behavioral and Neurodevelopmental disorders	Mental, Behavioral and Neurodevelopmental disorders	MHNM
I10	Essential (primary) hypertension	E78	Disorders of lipoprotein metabolism and other lipidemias	Women	1.78839	0.204283	1.38801	2.18878	0.00443197	0.0244722	Diseases of the circulatory system	Endocrine, nutritional and metabolic diseases	CMD
E66	Overweight and obesity	E78	Disorders of lipoprotein metabolism and other lipidemias	Women	1.44	0.207153	1.03398	1.84601	0.0783659	0.174605	Endocrine, nutritional and metabolic diseases	Endocrine, nutritional and metabolic diseases	CMD
F17	Nicotine dependence	F18	Inhalant related disorders	Women	1.10025	0.223586	0.662031	1.53847	0.669162	0.772578	Mental, Behavioral and Neurodevelopmental disorders	Mental, Behavioral and Neurodevelopmental disorders	MHNM
N92	Excessive, frequent and irregular menstruation	N95	Menopausal and other perimenopausal disorders	Women	1.2755	0.217852	0.848521	1.70249	0.263994	0.400228	Diseases of the genitourinary system	Diseases of the genitourinary system	MHNM
F41	Other anxiety disorders	F51	Sleep disorders not due to a substance or known physiol cond	Women	1.19632	0.223338	0.758583	1.63405	0.422213	0.53621	Mental, Behavioral and Neurodevelopmental disorders	Mental, Behavioral and Neurodevelopmental disorders	MHNM
E66	Overweight and obesity	I10	Essential (primary) hypertension	Women	1.30564	0.222577	0.8694	1.74189	0.230832	0.366446	Endocrine, nutritional and metabolic diseases	Diseases of the circulatory system	CMD
E78	Disorders of lipoprotein metabolism and other lipidemias	I10	Essential (primary) hypertension	Women	1.18795	0.236269	0.724871	1.65103	0.466031	0.586	Endocrine, nutritional and metabolic diseases	Diseases of the circulatory system	CMD
E02	Subclinical iodine-deficiency hypothyroidism	E03	Other hypothyroidism	Women	1.01055	0.24004	0.540083	1.48102	0.965117	0.972903	Endocrine, nutritional and metabolic diseases	Endocrine, nutritional and metabolic diseases	CMD
F17	Nicotine dependence	F32	Major depressive disorder, single episode	Women	1.32505	0.220668	0.89255	1.75755	0.20215	0.337177	Mental, Behavioral and Neurodevelopmental disorders	Mental, Behavioral and Neurodevelopmental disorders	MHNM
G43	Migraine	F41	Other anxiety disorders	Women	1.8548	0.202389	1.45812	2.25147	0.00227002	0.0144146	Diseases of the nervous system	Mental, Behavioral and Neurodevelopmental disorders	MHNM
F41	Other anxiety disorders	F39	Unspecified mood [affective] disorder	Women	1.43986	0.222352	1.00406	1.87566	0.101107	0.210502	Mental, Behavioral and Neurodevelopmental disorders	Mental, Behavioral and Neurodevelopmental disorders	MHNM
F41	Other anxiety disorders	G56	Mononeuropathies of upper limb	Women	1.86859	0.211151	1.45474	2.28244	0.0030681	0.0185547	Mental, Behavioral and Neurodevelopmental disorders	Diseases of the nervous system	MHNM
F41	Other anxiety disorders	G43	Migraine	Women	2.31009	0.198764	1.92052	2.69966	2.52608e-05	0.00143189	Mental, Behavioral and Neurodevelopmental disorders	Diseases of the nervous system	MHNM
F32	Major depressive disorder, single episode	E78	Disorders of lipoprotein metabolism and other lipidemias	Women	1.36459	0.235482	0.903055	1.82613	0.186808	0.334509	Mental, Behavioral and Neurodevelopmental disorders	Endocrine, nutritional and metabolic diseases	MHNM - CMD
N95	Menopausal and other perimenopausal disorders	E78	Disorders of lipoprotein metabolism and other lipidemias	Women	0.560144	0.34717	-0.120296	1.24058	0.0950399	0.201168	Diseases of the genitourinary system	Endocrine, nutritional and metabolic diseases	MHNM - CMD
E78	Disorders of lipoprotein metabolism and other lipidemias	E03	Other hypothyroidism	Women	1.24896	0.259151	0.741029	1.75688	0.390985	0.522685	Endocrine, nutritional and metabolic diseases	Endocrine, nutritional and metabolic diseases	CMD
F41	Other anxiety disorders	M51	Thoracic, thoracolum, and lumbosacral intvrt disc disorders	Women	2.26366	0.219688	1.83308	2.69424	0.000200139	0.00363109	Mental, Behavioral and Neurodevelopmental disorders	Diseases of the musculoskeletal system and connective tissue	MHNM
F17	Nicotine dependence	G43	Migraine	Women	1.98249	0.222517	1.54637	2.41862	0.00210132	0.0144146	Mental, Behavioral and Neurodevelopmental disorders	Diseases of the nervous system	MHNM
F32	Major depressive disorder, single episode	F34	Persistent mood [affective] disorders	Women	1.57002	0.246335	1.08721	2.05283	0.06707	0.160715	Mental, Behavioral and Neurodevelopmental disorders	Mental, Behavioral and Neurodevelopmental disorders	MHNM
N92	Excessive, frequent and irregular menstruation	F41	Other anxiety disorders	Women	1.69319	0.235238	1.23213	2.15425	0.0251794	0.0969026	Diseases of the genitourinary system	Mental, Behavioral and Neurodevelopmental disorders	MHNM
E78	Disorders of lipoprotein metabolism and other lipidemias	F32	Major depressive disorder, single episode	Women	1.60126	0.250583	1.11013	2.0924	0.0602725	0.157027	Endocrine, nutritional and metabolic diseases	Mental, Behavioral and Neurodevelopmental disorders	CMD - MHNM
F32	Major depressive disorder, single episode	E66	Overweight and obesity	Women	1.19711	0.266808	0.674171	1.72004	0.500126	0.621792	Mental, Behavioral and Neurodevelopmental disorders	Endocrine, nutritional and metabolic diseases	MHNM - CMD
F41	Other anxiety disorders	K21	Gastro-esophageal reflux disease	Women	2.52375	0.223283	2.08612	2.96138	3.38241e-05	0.00143189	Mental, Behavioral and Neurodevelopmental disorders	Diseases of the digestive system	MHNM - CMD
E66	Overweight and obesity	F32	Major depressive disorder, single episode	Women	1.61666	0.250606	1.12548	2.10784	0.0552628	0.152574	Endocrine, nutritional and metabolic diseases	Mental, Behavioral and Neurodevelopmental disorders	CMD - MHNM
F17	Nicotine dependence	F34	Persistent mood [affective] disorders	Women	0.990961	0.290124	0.422328	1.55959	0.975031	0.975031	Mental, Behavioral and Neurodevelopmental disorders	Mental, Behavioral and Neurodevelopmental disorders	MHNM
G43	Migraine	N92	Excessive, frequent and irregular menstruation	Women	1.36786	0.261369	0.855583	1.88013	0.230731	0.366446	Diseases of the nervous system	Diseases of the genitourinary system	MHNM
E78	Disorders of lipoprotein metabolism and other lipidemias	F51	Sleep disorders not due to a substance or known physiol cond	Women	0.928339	0.313182	0.314514	1.54216	0.812325	0.866935	Endocrine, nutritional and metabolic diseases	Mental, Behavioral and Neurodevelopmental disorders	CMD - MHNM
I10	Essential (primary) hypertension	N95	Menopausal and other perimenopausal disorders	Women	0.740686	0.344835	0.064822	1.41655	0.384028	0.519742	Diseases of the circulatory system	Diseases of the genitourinary system	CMD - MHNM
E03	Other hypothyroidism	E78	Disorders of lipoprotein metabolism and other lipidemias	Women	1.77907	0.259111	1.27123	2.28692	0.0261926	0.0978369	Endocrine, nutritional and metabolic diseases	Endocrine, nutritional and metabolic diseases	CMD
E03	Other hypothyroidism	E66	Overweight and obesity	Women	1.28219	0.283312	0.726914	1.83748	0.380278	0.519742	Endocrine, nutritional and metabolic diseases	Endocrine, nutritional and metabolic diseases	CMD
F32	Major depressive disorder, single episode	N92	Excessive, frequent and irregular menstruation	Women	1.20696	0.281702	0.654839	1.75909	0.504288	0.621792	Mental, Behavioral and Neurodevelopmental disorders	Diseases of the genitourinary system	MHNM
F41	Other anxiety disorders	K76	Other diseases of liver	Women	2.00468	0.252383	1.51002	2.49934	0.00585715	0.0297543	Mental, Behavioral and Neurodevelopmental disorders	Diseases of the digestive system	MHNM - CMD
F41	Other anxiety disorders	G44	Other headache syndromes	Women	1.05507	0.300704	0.465702	1.64444	0.858507	0.908587	Mental, Behavioral and Neurodevelopmental disorders	Diseases of the nervous system	MHNM
E78	Disorders of lipoprotein metabolism and other lipidemias	E55	Vitamin D deficiency	Women	2.29237	0.254801	1.79297	2.79177	0.00113067	0.0110458	Endocrine, nutritional and metabolic diseases	Endocrine, nutritional and metabolic diseases	CMD
F17	Nicotine dependence	F39	Unspecified mood [affective] disorder	Women	1.60436	0.267295	1.08047	2.12825	0.0769684	0.174553	Mental, Behavioral and Neurodevelopmental disorders	Mental, Behavioral and Neurodevelopmental disorders	MHNM
E78	Disorders of lipoprotein metabolism and other lipidemias	F34	Persistent mood [affective] disorders	Women	1.097	0.308299	0.49275	1.70126	0.763947	0.83639	Endocrine, nutritional and metabolic diseases	Mental, Behavioral and Neurodevelopmental disorders	CMD - MHNM
E66	Overweight and obesity	G56	Mononeuropathies of upper limb	Women	2.06588	0.254065	1.56792	2.56384	0.00429314	0.0244722	Endocrine, nutritional and metabolic diseases	Diseases of the nervous system	CMD - MHNM
E78	Disorders of lipoprotein metabolism and other lipidemias	M20	Acquired deformities of fingers and toes	Women	0.869552	0.340338	0.202501	1.5366	0.681292	0.779496	Endocrine, nutritional and metabolic diseases	Diseases of the musculoskeletal system and connective tissue	CMD - MHNM
F32	Major depressive disorder, single episode	F43	Reaction to severe stress, and adjustment disorders	Women	1.73332	0.269593	1.20493	2.26171	0.0413249	0.131207	Mental, Behavioral and Neurodevelopmental disorders	Mental, Behavioral and Neurodevelopmental disorders	MHNM
E78	Disorders of lipoprotein metabolism and other lipidemias	K21	Gastro-esophageal reflux disease	Women	2.31382	0.262559	1.79922	2.82843	0.00139783	0.0126803	Endocrine, nutritional and metabolic diseases	Diseases of the digestive system	CMD
F43	Reaction to severe stress, and adjustment disorders	F41	Other anxiety disorders	Women	1.93041	0.262142	1.41662	2.4442	0.0121054	0.0549068	Mental, Behavioral and Neurodevelopmental disorders	Mental, Behavioral and Neurodevelopmental disorders	MHNM
I10	Essential (primary) hypertension	F32	Major depressive disorder, single episode	Women	1.30087	0.302586	0.707812	1.89393	0.384691	0.519742	Diseases of the circulatory system	Mental, Behavioral and Neurodevelopmental disorders	CMD - MHNM
E78	Disorders of lipoprotein metabolism and other lipidemias	G56	Mononeuropathies of upper limb	Women	1.1282	0.313342	0.514064	1.74234	0.700263	0.790046	Endocrine, nutritional and metabolic diseases	Diseases of the nervous system	CMD - MHNM
G56	Mononeuropathies of upper limb	E78	Disorders of lipoprotein metabolism and other lipidemias	Women	1.45803	0.295763	0.878348	2.03772	0.20232	0.337177	Diseases of the nervous system	Endocrine, nutritional and metabolic diseases	MHNM - CMD
E78	Disorders of lipoprotein metabolism and other lipidemias	M51	Thoracic, thoracolum, and lumbosacral intvrt disc disorders	Women	2.24573	0.263794	1.7287	2.76275	0.00216295	0.0144146	Endocrine, nutritional and metabolic diseases	Diseases of the musculoskeletal system and connective tissue	CMD - MHNM
E78	Disorders of lipoprotein metabolism and other lipidemias	M19	Other and unspecified osteoarthritis	Women	1.3827	0.308276	0.778491	1.98691	0.293198	0.428002	Endocrine, nutritional and metabolic diseases	Diseases of the musculoskeletal system and connective tissue	CMD - MHNM
E66	Overweight and obesity	K76	Other diseases of liver	Women	1.02084	0.322977	0.387819	1.65387	0.949075	0.972903	Endocrine, nutritional and metabolic diseases	Diseases of the digestive system	CMD
E78	Disorders of lipoprotein metabolism and other lipidemias	M81	Osteoporosis without current pathological fracture	Women	0.984683	0.354232	0.290401	1.67896	0.965242	0.972903	Endocrine, nutritional and metabolic diseases	Diseases of the musculoskeletal system and connective tissue	CMD - MHNM
E66	Overweight and obesity	H60	Otitis externa	Women	1.7228	0.278965	1.17604	2.26956	0.0511888	0.148557	Endocrine, nutritional and metabolic diseases	Diseases of the ear and mastoid process	CMD - MHNM
E78	Disorders of lipoprotein metabolism and other lipidemias	M17	Osteoarthritis of knee	Women	1.496	0.314825	0.878957	2.11305	0.200746	0.337177	Endocrine, nutritional and metabolic diseases	Diseases of the musculoskeletal system and connective tissue	CMD - MHNM
F32	Major depressive disorder, single episode	I10	Essential (primary) hypertension	Women	1.70918	0.292184	1.13651	2.28185	0.0665793	0.160715	Mental, Behavioral and Neurodevelopmental disorders	Diseases of the circulatory system	MHNM - CMD
G56	Mononeuropathies of upper limb	F41	Other anxiety disorders	Women	1.17029	0.321391	0.540379	1.80021	0.624634	0.734523	Diseases of the nervous system	Mental, Behavioral and Neurodevelopmental disorders	MHNM
F41	Other anxiety disorders	M47	Spondylosis	Women	1.7584	0.289802	1.1904	2.3264	0.0514686	0.148557	Mental, Behavioral and Neurodevelopmental disorders	Diseases of the musculoskeletal system and connective tissue	MHNM
E66	Overweight and obesity	E03	Other hypothyroidism	Women	1.71401	0.287149	1.15121	2.27682	0.0605853	0.157027	Endocrine, nutritional and metabolic diseases	Endocrine, nutritional and metabolic diseases	CMD
F41	Other anxiety disorders	R32	Unspecified urinary incontinence	Women	1.68328	0.29154	1.11187	2.25468	0.07407	0.171034	Mental, Behavioral and Neurodevelopmental disorders	Symptoms, signs and abnormal clinical and laboratory findings, not elsewhere classified	MHNM
F32	Major depressive disorder, single episode	F51	Sleep disorders not due to a substance or known physiol cond	Women	1.22599	0.320098	0.598615	1.85337	0.524429	0.63431	Mental, Behavioral and Neurodevelopmental disorders	Mental, Behavioral and Neurodevelopmental disorders	MHNM
E78	Disorders of lipoprotein metabolism and other lipidemias	K76	Other diseases of liver	Women	1.80128	0.292847	1.22731	2.37525	0.0444755	0.137766	Endocrine, nutritional and metabolic diseases	Diseases of the digestive system	CMD
F41	Other anxiety disorders	N91	Absent, scanty and rare menstruation	Women	2.28476	0.268274	1.75896	2.81057	0.00207059	0.0144146	Mental, Behavioral and Neurodevelopmental disorders	Diseases of the genitourinary system	MHNM
J45	Asthma	J30	Vasomotor and allergic rhinitis	Women	3.14764	0.257004	2.64392	3.65136	8.13486e-06	0.00103313	Diseases of the respiratory system	Diseases of the respiratory system	RESP
N95	Menopausal and other perimenopausal disorders	I10	Essential (primary) hypertension	Women	1.01876	0.361963	0.309325	1.72819	0.959049	0.972903	Diseases of the genitourinary system	Diseases of the circulatory system	MHNM - CMD
F51	Sleep disorders not due to a substance or known physiol cond	F41	Other anxiety disorders	Women	0.543403	0.436342	-0.311811	1.39862	0.162184	0.316882	Mental, Behavioral and Neurodevelopmental disorders	Mental, Behavioral and Neurodevelopmental disorders	MHNM
E66	Overweight and obesity	M17	Osteoarthritis of knee	Women	1.90422	0.300587	1.31508	2.49336	0.032136	0.107402	Endocrine, nutritional and metabolic diseases	Diseases of the musculoskeletal system and connective tissue	CMD - MHNM
M18	Osteoarthritis of first carpometacarpal joint	M19	Other and unspecified osteoarthritis	Women	0.553832	0.46836	-0.364137	1.4718	0.207085	0.337177	Diseases of the musculoskeletal system and connective tissue	Diseases of the musculoskeletal system and connective tissue	MHNM
F34	Persistent mood [affective] disorders	E66	Overweight and obesity	Women	1.52283	0.314741	0.905952	2.13971	0.181468	0.334509	Mental, Behavioral and Neurodevelopmental disorders	Endocrine, nutritional and metabolic diseases	MHNM - CMD
E66	Overweight and obesity	F39	Unspecified mood [affective] disorder	Women	2.0136	0.293287	1.43877	2.58843	0.0170103	0.0720104	Endocrine, nutritional and metabolic diseases	Mental, Behavioral and Neurodevelopmental disorders	CMD - MHNM
F43	Reaction to severe stress, and adjustment disorders	E66	Overweight and obesity	Women	1.35293	0.323481	0.718924	1.98694	0.350073	0.493992	Mental, Behavioral and Neurodevelopmental disorders	Endocrine, nutritional and metabolic diseases	MHNM - CMD
E66	Overweight and obesity	F43	Reaction to severe stress, and adjustment disorders	Women	1.9764	0.299746	1.38891	2.56389	0.0230355	0.0914223	Endocrine, nutritional and metabolic diseases	Mental, Behavioral and Neurodevelopmental disorders	CMD - MHNM
F32	Major depressive disorder, single episode	G56	Mononeuropathies of upper limb	Women	2.74146	0.277715	2.19715	3.28578	0.0002819	0.00447517	Mental, Behavioral and Neurodevelopmental disorders	Diseases of the nervous system	MHNM
F34	Persistent mood [affective] disorders	F41	Other anxiety disorders	Women	2.22088	0.293163	1.64629	2.79547	0.00649452	0.0317233	Mental, Behavioral and Neurodevelopmental disorders	Mental, Behavioral and Neurodevelopmental disorders	MHNM
F34	Persistent mood [affective] disorders	E78	Disorders of lipoprotein metabolism and other lipidemias	Women	1.75543	0.313208	1.14156	2.36931	0.0723963	0.170265	Mental, Behavioral and Neurodevelopmental disorders	Endocrine, nutritional and metabolic diseases	MHNM - CMD
F32	Major depressive disorder, single episode	F17	Nicotine dependence	Women	1.78709	0.30739	1.18462	2.38956	0.0589229	0.157027	Mental, Behavioral and Neurodevelopmental disorders	Mental, Behavioral and Neurodevelopmental disorders	MHNM
M13	Other arthritis	M12	Other and unspecified arthropathy	Women	1.22902	0.349058	0.544883	1.91317	0.55466	0.658334	Diseases of the musculoskeletal system and connective tissue	Diseases of the musculoskeletal system and connective tissue	MHNM
J30	Vasomotor and allergic rhinitis	J45	Asthma	Women	2.67153	0.278867	2.12496	3.2181	0.000425516	0.00540405	Diseases of the respiratory system	Diseases of the respiratory system	RESP
E66	Overweight and obesity	K21	Gastro-esophageal reflux disease	Women	2.93007	0.279435	2.38239	3.47775	0.000119503	0.00303538	Endocrine, nutritional and metabolic diseases	Diseases of the digestive system	CMD
G56	Mononeuropathies of upper limb	E66	Overweight and obesity	Women	0.902819	0.384409	0.149391	1.65625	0.79028	0.850555	Diseases of the nervous system	Endocrine, nutritional and metabolic diseases	MHNM - CMD
E66	Overweight and obesity	M19	Other and unspecified osteoarthritis	Women	1.35771	0.345289	0.680953	2.03446	0.375818	0.519742	Endocrine, nutritional and metabolic diseases	Diseases of the musculoskeletal system and connective tissue	CMD - MHNM
E66	Overweight and obesity	F34	Persistent mood [affective] disorders	Women	1.2487	0.347687	0.567245	1.93015	0.522954	0.63431	Endocrine, nutritional and metabolic diseases	Mental, Behavioral and Neurodevelopmental disorders	CMD - MHNM
J45	Asthma	E66	Overweight and obesity	Women	1.62941	0.318494	1.00517	2.25365	0.125301	0.252846	Diseases of the respiratory system	Endocrine, nutritional and metabolic diseases	RESP - CMD
I10	Essential (primary) hypertension	F39	Unspecified mood [affective] disorder	Women	1.86389	0.322123	1.23254	2.49524	0.053236	0.150244	Diseases of the circulatory system	Mental, Behavioral and Neurodevelopmental disorders	CMD - MHNM
G43	Migraine	F32	Major depressive disorder, single episode	Women	1.32492	0.337571	0.663293	1.98655	0.404585	0.529714	Diseases of the nervous system	Mental, Behavioral and Neurodevelopmental disorders	MHNM
G43	Migraine	F51	Sleep disorders not due to a substance or known physiol cond	Women	1.45018	0.33326	0.797003	2.10336	0.264718	0.400228	Diseases of the nervous system	Mental, Behavioral and Neurodevelopmental disorders	MHNM
N95	Menopausal and other perimenopausal disorders	M20	Acquired deformities of fingers and toes	Women	0.541221	0.48486	-0.409086	1.49153	0.205443	0.337177	Diseases of the genitourinary system	Diseases of the musculoskeletal system and connective tissue	MHNM
G56	Mononeuropathies of upper limb	N95	Menopausal and other perimenopausal disorders	Women	0.707032	0.42913	-0.134046	1.54811	0.419168	0.53621	Diseases of the nervous system	Diseases of the genitourinary system	MHNM
F41	Other anxiety disorders	N94	Pain and oth cond assoc w fem gntl org and menstrual cycle	Women	1.77938	0.309505	1.17276	2.386	0.062619	0.159052	Mental, Behavioral and Neurodevelopmental disorders	Diseases of the genitourinary system	MHNM
F34	Persistent mood [affective] disorders	F43	Reaction to severe stress, and adjustment disorders	Women	0.862623	0.387527	0.103084	1.62216	0.702954	0.790046	Mental, Behavioral and Neurodevelopmental disorders	Mental, Behavioral and Neurodevelopmental disorders	MHNM
G56	Mononeuropathies of upper limb	I10	Essential (primary) hypertension	Women	0.881585	0.397094	0.103295	1.65988	0.750948	0.829307	Diseases of the nervous system	Diseases of the circulatory system	MHNM - CMD
G43	Migraine	J30	Vasomotor and allergic rhinitis	Women	3.07625	0.280039	2.52738	3.62511	6.00283e-05	0.0019059	Diseases of the nervous system	Diseases of the respiratory system	MHNM - RESP
M51	Thoracic, thoracolum, and lumbosacral intvrt disc disorders	F41	Other anxiety disorders	Women	2.33459	0.304861	1.73707	2.93211	0.00541824	0.0286715	Diseases of the musculoskeletal system and connective tissue	Mental, Behavioral and Neurodevelopmental disorders	MHNM
F17	Nicotine dependence	M12	Other and unspecified arthropathy	Women	0.977583	0.38462	0.223741	1.73142	0.952994	0.972903	Mental, Behavioral and Neurodevelopmental disorders	Diseases of the musculoskeletal system and connective tissue	MHNM
N95	Menopausal and other perimenopausal disorders	M81	Osteoporosis without current pathological fracture	Women	0.951256	0.423473	0.121265	1.78125	0.906064	0.950993	Diseases of the genitourinary system	Diseases of the musculoskeletal system and connective tissue	MHNM
F43	Reaction to severe stress, and adjustment disorders	N92	Excessive, frequent and irregular menstruation	Women	2.4809	0.295613	1.90151	3.06029	0.00211436	0.0144146	Mental, Behavioral and Neurodevelopmental disorders	Diseases of the genitourinary system	MHNM
F51	Sleep disorders not due to a substance or known physiol cond	E78	Disorders of lipoprotein metabolism and other lipidemias	Women	2.02147	0.322289	1.3898	2.65315	0.0289739	0.102213	Mental, Behavioral and Neurodevelopmental disorders	Endocrine, nutritional and metabolic diseases	MHNM - CMD
H60	Otitis externa	E66	Overweight and obesity	Women	1.56387	0.337678	0.902028	2.2257	0.18543	0.334509	Diseases of the ear and mastoid process	Endocrine, nutritional and metabolic diseases	MHNM - CMD
N92	Excessive, frequent and irregular menstruation	G56	Mononeuropathies of upper limb	Women	1.77203	0.328623	1.12795	2.41612	0.0816858	0.178864	Diseases of the genitourinary system	Diseases of the nervous system	MHNM
E66	Overweight and obesity	M23	Internal derangement of knee	Women	2.32241	0.316024	1.70302	2.94181	0.00766973	0.0360761	Endocrine, nutritional and metabolic diseases	Diseases of the musculoskeletal system and connective tissue	CMD - MHNM
J30	Vasomotor and allergic rhinitis	G43	Migraine	Women	2.52485	0.302433	1.93209	3.11761	0.00219545	0.0144146	Diseases of the respiratory system	Diseases of the nervous system	RESP - MHNM
F51	Sleep disorders not due to a substance or known physiol cond	N95	Menopausal and other perimenopausal disorders	Women	0.670557	0.472491	-0.255508	1.59662	0.397648	0.526055	Mental, Behavioral and Neurodevelopmental disorders	Diseases of the genitourinary system	MHNM
N92	Excessive, frequent and irregular menstruation	F32	Major depressive disorder, single episode	Women	1.60049	0.343577	0.927094	2.27389	0.171041	0.329124	Diseases of the genitourinary system	Mental, Behavioral and Neurodevelopmental disorders	MHNM
F34	Persistent mood [affective] disorders	N92	Excessive, frequent and irregular menstruation	Women	1.45245	0.347523	0.771317	2.13358	0.282807	0.420985	Mental, Behavioral and Neurodevelopmental disorders	Diseases of the genitourinary system	MHNM
G43	Migraine	F43	Reaction to severe stress, and adjustment disorders	Women	1.75007	0.333429	1.09656	2.40357	0.0932536	0.200732	Diseases of the nervous system	Mental, Behavioral and Neurodevelopmental disorders	MHNM
G56	Mononeuropathies of upper limb	N92	Excessive, frequent and irregular menstruation	Women	1.3355	0.360147	0.629629	2.04138	0.421797	0.53621	Diseases of the nervous system	Diseases of the genitourinary system	MHNM
F32	Major depressive disorder, single episode	H91	Other and unspecified hearing loss	Women	1.58949	0.351211	0.901133	2.27786	0.187009	0.334509	Mental, Behavioral and Neurodevelopmental disorders	Diseases of the ear and mastoid process	MHNM
F32	Major depressive disorder, single episode	G43	Migraine	Women	1.9811	0.332784	1.32885	2.63334	0.0399431	0.130071	Mental, Behavioral and Neurodevelopmental disorders	Diseases of the nervous system	MHNM
I10	Essential (primary) hypertension	E11	Type 2 diabetes mellitus	Women	1.99844	0.347017	1.3183	2.67858	0.0460218	0.139161	Diseases of the circulatory system	Endocrine, nutritional and metabolic diseases	CMD
G56	Mononeuropathies of upper limb	F32	Major depressive disorder, single episode	Women	0.75648	0.456747	-0.138727	1.65169	0.541189	0.648406	Diseases of the nervous system	Mental, Behavioral and Neurodevelopmental disorders	MHNM
F32	Major depressive disorder, single episode	M51	Thoracic, thoracolum, and lumbosacral intvrt disc disorders	Women	1.5893	0.355496	0.892539	2.28606	0.192497	0.337177	Mental, Behavioral and Neurodevelopmental disorders	Diseases of the musculoskeletal system and connective tissue	MHNM
F41	Other anxiety disorders	H65	Nonsuppurative otitis media	Women	2.97358	0.30658	2.3727	3.57447	0.000378564	0.00534195	Mental, Behavioral and Neurodevelopmental disorders	Diseases of the ear and mastoid process	MHNM
I10	Essential (primary) hypertension	K21	Gastro-esophageal reflux disease	Women	3.2168	0.308512	2.61213	3.82147	0.000152376	0.00322529	Diseases of the circulatory system	Diseases of the digestive system	CMD
E66	Overweight and obesity	E11	Type 2 diabetes mellitus	Women	1.71802	0.358727	1.01492	2.42111	0.131405	0.260756	Endocrine, nutritional and metabolic diseases	Endocrine, nutritional and metabolic diseases	CMD
G43	Migraine	F17	Nicotine dependence	Women	1.18102	0.381228	0.433827	1.92821	0.662527	0.771935	Diseases of the nervous system	Mental, Behavioral and Neurodevelopmental disorders	MHNM
N92	Excessive, frequent and irregular menstruation	F43	Reaction to severe stress, and adjustment disorders	Women	1.43253	0.362635	0.721774	2.14328	0.321594	0.464119	Diseases of the genitourinary system	Mental, Behavioral and Neurodevelopmental disorders	MHNM
M81	Osteoporosis without current pathological fracture	E78	Disorders of lipoprotein metabolism and other lipidemias	Women	0.495291	0.601254	-0.683146	1.67373	0.242576	0.375696	Diseases of the musculoskeletal system and connective tissue	Endocrine, nutritional and metabolic diseases	MHNM - CMD
E78	Disorders of lipoprotein metabolism and other lipidemias	M47	Spondylosis	Women	1.9232	0.353685	1.22999	2.61641	0.0644468	0.160485	Endocrine, nutritional and metabolic diseases	Diseases of the musculoskeletal system and connective tissue	CMD - MHNM
J30	Vasomotor and allergic rhinitis	H91	Other and unspecified hearing loss	Women	2.08403	0.333248	1.43087	2.73718	0.0275615	0.100009	Diseases of the respiratory system	Diseases of the ear and mastoid process	RESP - MHNM
E78	Disorders of lipoprotein metabolism and other lipidemias	I10	Essential (primary) hypertension	Men	1.26444	0.2331	0.807576	1.72131	0.31414	0.97256	Endocrine, nutritional and metabolic diseases	Diseases of the circulatory system	CMD
I10	Essential (primary) hypertension	E66	Overweight and obesity	Men	1.09787	0.256429	0.595281	1.60047	0.715757	0.97256	Diseases of the circulatory system	Endocrine, nutritional and metabolic diseases	CMD
I10	Essential (primary) hypertension	E78	Disorders of lipoprotein metabolism and other lipidemias	Men	1.56446	0.237501	1.09897	2.02996	0.0595133	0.97256	Diseases of the circulatory system	Endocrine, nutritional and metabolic diseases	CMD
E78	Disorders of lipoprotein metabolism and other lipidemias	E66	Overweight and obesity	Men	1.02012	0.266119	0.498539	1.54171	0.940323	0.97256	Endocrine, nutritional and metabolic diseases	Endocrine, nutritional and metabolic diseases	CMD
E78	Disorders of lipoprotein metabolism and other lipidemias	N40	Enlarged prostate	Men	0.808186	0.323235	0.174656	1.44172	0.509993	0.97256	Endocrine, nutritional and metabolic diseases	Diseases of the genitourinary system	CMD - MHNM
I10	Essential (primary) hypertension	N40	Enlarged prostate	Men	0.753696	0.351994	0.0638005	1.44359	0.421785	0.97256	Diseases of the circulatory system	Diseases of the genitourinary system	CMD - MHNM
E66	Overweight and obesity	I10	Essential (primary) hypertension	Men	1.22998	0.284862	0.671666	1.7883	0.467425	0.97256	Endocrine, nutritional and metabolic diseases	Diseases of the circulatory system	CMD
E66	Overweight and obesity	E78	Disorders of lipoprotein metabolism and other lipidemias	Men	1.57959	0.27581	1.03901	2.12016	0.0974131	0.97256	Endocrine, nutritional and metabolic diseases	Endocrine, nutritional and metabolic diseases	CMD
F17	Nicotine dependence	F18	Inhalant related disorders	Men	1.03985	0.346358	0.361007	1.7187	0.910162	0.97256	Mental, Behavioral and Neurodevelopmental disorders	Mental, Behavioral and Neurodevelopmental disorders	MHNM
E78	Disorders of lipoprotein metabolism and other lipidemias	H91	Other and unspecified hearing loss	Men	1.90323	0.318701	1.27859	2.52788	0.0434555	0.97256	Endocrine, nutritional and metabolic diseases	Diseases of the ear and mastoid process	CMD - MHNM
F32	Major depressive disorder, single episode	F39	Unspecified mood [affective] disorder	Men	1.35189	0.348723	0.668402	2.03537	0.387266	0.97256	Mental, Behavioral and Neurodevelopmental disorders	Mental, Behavioral and Neurodevelopmental disorders	MHNM
E78	Disorders of lipoprotein metabolism and other lipidemias	K76	Other diseases of liver	Men	1.34185	0.369246	0.618143	2.06556	0.425826	0.97256	Endocrine, nutritional and metabolic diseases	Diseases of the digestive system	CMD
I10	Essential (primary) hypertension	E11	Type 2 diabetes mellitus	Men	0.863355	0.449344	-0.0173424	1.74405	0.743679	0.97256	Diseases of the circulatory system	Endocrine, nutritional and metabolic diseases	CMD
E66	Overweight and obesity	G47	Sleep disorders	Men	1.47888	0.351019	0.790899	2.16687	0.264971	0.97256	Endocrine, nutritional and metabolic diseases	Diseases of the nervous system	CMD - MHNM
F41	Other anxiety disorders	F34	Persistent mood [affective] disorders	Men	0.983338	0.407946	0.183778	1.7829	0.967147	0.97256	Mental, Behavioral and Neurodevelopmental disorders	Mental, Behavioral and Neurodevelopmental disorders	MHNM
F41	Other anxiety disorders	J30	Vasomotor and allergic rhinitis	Men	1.11849	0.404089	0.326486	1.91049	0.781697	0.97256	Mental, Behavioral and Neurodevelopmental disorders	Diseases of the respiratory system	MHNM – RESP
F41	Other anxiety disorders	F32	Major depressive disorder, single episode	Men	1.24484	0.395732	0.469216	2.02046	0.579979	0.97256	Mental, Behavioral and Neurodevelopmental disorders	Mental, Behavioral and Neurodevelopmental disorders	MHNM
E78	Disorders of lipoprotein metabolism and other lipidemias	E11	Type 2 diabetes mellitus	Men	0.614199	0.511655	-0.388626	1.61702	0.34076	0.97256	Endocrine, nutritional and metabolic diseases	Endocrine, nutritional and metabolic diseases	CMD
I10	Essential (primary) hypertension	G47	Sleep disorders	Men	1.66025	0.37728	0.920796	2.39971	0.17903	0.97256	Diseases of the circulatory system	Diseases of the nervous system	CMD - MHNM
F17	Nicotine dependence	G47	Sleep disorders	Men	1.09202	0.424678	0.259664	1.92437	0.835791	0.97256	Mental, Behavioral and Neurodevelopmental disorders	Diseases of the nervous system	MHNM
E66	Overweight and obesity	E11	Type 2 diabetes mellitus	Men	0.519886	0.568849	-0.595038	1.63481	0.250166	0.97256	Endocrine, nutritional and metabolic diseases	Endocrine, nutritional and metabolic diseases	CMD
I10	Essential (primary) hypertension	K76	Other diseases of liver	Men	1.11226	0.437703	0.254376	1.97014	0.807951	0.97256	Diseases of the circulatory system	Diseases of the digestive system	CMD
E66	Overweight and obesity	K76	Other diseases of liver	Men	1.08294	0.436635	0.227156	1.93873	0.855194	0.97256	Endocrine, nutritional and metabolic diseases	Diseases of the digestive system	CMD
J30	Vasomotor and allergic rhinitis	F41	Other anxiety disorders	Men	1.48855	0.402909	0.698863	2.27824	0.323483	0.97256	Diseases of the respiratory system	Mental, Behavioral and Neurodevelopmental disorders	RESP - MHNM
E11	Type 2 diabetes mellitus	E66	Overweight and obesity	Men	0.968279	0.505642	-0.022761	1.95932	0.949169	0.97256	Endocrine, nutritional and metabolic diseases	Endocrine, nutritional and metabolic diseases	CMD
F41	Other anxiety disorders	F43	Reaction to severe stress, and adjustment disorders	Men	0.811057	0.541154	-0.249585	1.8717	0.698769	0.97256	Mental, Behavioral and Neurodevelopmental disorders	Mental, Behavioral and Neurodevelopmental disorders	MHNM
F17	Nicotine dependence	E11	Type 2 diabetes mellitus	Men	1.32566	0.463915	0.416406	2.23492	0.543398	0.97256	Mental, Behavioral and Neurodevelopmental disorders	Endocrine, nutritional and metabolic diseases	MHNM - CMD
E78	Disorders of lipoprotein metabolism and other lipidemias	M10	Gout	Men	0.830045	0.560974	-0.269444	1.92953	0.739846	0.97256	Endocrine, nutritional and metabolic diseases	Diseases of the musculoskeletal system and connective tissue	CMD - MHNM
F17	Nicotine dependence	F10	Alcohol related disorders	Men	0.565413	0.639451	-0.687887	1.81871	0.372554	0.97256	Mental, Behavioral and Neurodevelopmental disorders	Mental, Behavioral and Neurodevelopmental disorders	MHNM
E11	Type 2 diabetes mellitus	E78	Disorders of lipoprotein metabolism and other lipidemias	Men	1.67123	0.455809	0.777865	2.5646	0.259867	0.97256	Endocrine, nutritional and metabolic diseases	Endocrine, nutritional and metabolic diseases	CMD
F41	Other anxiety disorders	G47	Sleep disorders	Men	1.39434	0.440089	0.531787	2.2569	0.450034	0.97256	Mental, Behavioral and Neurodevelopmental disorders	Diseases of the nervous system	MHNM
N40	Enlarged prostate	E78	Disorders of lipoprotein metabolism and other lipidemias	Men	1.08942	0.549004	0.0133917	2.16545	0.876032	0.97256	Diseases of the genitourinary system	Endocrine, nutritional and metabolic diseases	MHNM - CMD
N40	Enlarged prostate	I10	Essential (primary) hypertension	Men	1.75893	0.459859	0.857619	2.66023	0.21945	0.97256	Diseases of the genitourinary system	Diseases of the circulatory system	MHNM - CMD
J30	Vasomotor and allergic rhinitis	J45	Asthma	Men	1.62953	0.436033	0.774921	2.48414	0.262778	0.97256	Diseases of the respiratory system	Diseases of the respiratory system	RESP
F41	Other anxiety disorders	F51	Sleep disorders not due to a substance or known physiol cond	Men	1.12693	0.515188	0.117176	2.13668	0.816583	0.97256	Mental, Behavioral and Neurodevelopmental disorders	Mental, Behavioral and Neurodevelopmental disorders	MHNM
H91	Other and unspecified hearing loss	E78	Disorders of lipoprotein metabolism and other lipidemias	Men	1.06229	0.546718	-0.00925385	2.13384	0.911986	0.97256	Diseases of the ear and mastoid process	Endocrine, nutritional and metabolic diseases	MHNM - CMD
J45	Asthma	J30	Vasomotor and allergic rhinitis	Men	0.45684	0.746428	-1.00613	1.91981	0.29392	0.97256	Diseases of the respiratory system	Diseases of the respiratory system	RESP
F41	Other anxiety disorders	F39	Unspecified mood [affective] disorder	Men	1.21669	0.510974	0.215199	2.21818	0.701094	0.97256	Mental, Behavioral and Neurodevelopmental disorders	Mental, Behavioral and Neurodevelopmental disorders	MHNM
E78	Disorders of lipoprotein metabolism and other lipidemias	H40	Glaucoma	Men	0.808709	0.627327	-0.420829	2.03825	0.735028	0.97256	Endocrine, nutritional and metabolic diseases	Diseases of the eye and adnexa	CMD - MHNM
E11	Type 2 diabetes mellitus	I10	Essential (primary) hypertension	Men	1.65506	0.479583	0.715095	2.59503	0.293454	0.97256	Endocrine, nutritional and metabolic diseases	Diseases of the circulatory system	CMD
G47	Sleep disorders	E66	Overweight and obesity	Men	1.07262	0.53039	0.0330773	2.11217	0.894843	0.97256	Diseases of the nervous system	Endocrine, nutritional and metabolic diseases	MHNM - CMD
F32	Major depressive disorder, single episode	F41	Other anxiety disorders	Men	0.941501	0.601897	-0.238196	2.1212	0.920225	0.97256	Mental, Behavioral and Neurodevelopmental disorders	Mental, Behavioral and Neurodevelopmental disorders	MHNM
E78	Disorders of lipoprotein metabolism and other lipidemias	K57	Diverticular disease of intestine	Men	0.857145	0.629127	-0.375921	2.09021	0.806441	0.97256	Endocrine, nutritional and metabolic diseases	Diseases of the digestive system	CMD
G47	Sleep disorders	N40	Enlarged prostate	Men	1.24271	0.539195	0.18591	2.29952	0.686946	0.97256	Diseases of the nervous system	Diseases of the genitourinary system	MHNM
I10	Essential (primary) hypertension	M17	Osteoarthritis of knee	Men	1.1862	0.60843	-0.00630043	2.3787	0.77898	0.97256	Diseases of the circulatory system	Diseases of the musculoskeletal system and connective tissue	CMD - MHNM
E66	Overweight and obesity	M17	Osteoarthritis of knee	Men	0.740311	0.730776	-0.691984	2.17261	0.680735	0.97256	Endocrine, nutritional and metabolic diseases	Diseases of the musculoskeletal system and connective tissue	CMD - MHNM
I10	Essential (primary) hypertension	K57	Diverticular disease of intestine	Men	1.40207	0.559492	0.305487	2.49865	0.545823	0.97256	Diseases of the circulatory system	Diseases of the digestive system	CMD
E78	Disorders of lipoprotein metabolism and other lipidemias	F10	Alcohol related disorders	Men	2.25888	0.466237	1.34507	3.17268	0.0805065	0.97256	Endocrine, nutritional and metabolic diseases	Mental, Behavioral and Neurodevelopmental disorders	CMD - MHNM
I10	Essential (primary) hypertension	M10	Gout	Men	0.386276	1.01746	-1.6079	2.38045	0.349848	0.97256	Diseases of the circulatory system	Diseases of the musculoskeletal system and connective tissue	CMD - MHNM
F32	Major depressive disorder, single episode	N40	Enlarged prostate	Men	0.84913	0.65977	-0.443996	2.14226	0.804229	0.97256	Mental, Behavioral and Neurodevelopmental disorders	Diseases of the genitourinary system	MHNM
G47	Sleep disorders	I10	Essential (primary) hypertension	Men	1.59022	0.526197	0.558895	2.62155	0.378015	0.97256	Diseases of the nervous system	Diseases of the circulatory system	MHNM - CMD
[truncated: 3 more rows]

## Sheet: Sup Table S10
Table S10. Genetic correlation of long COVID associated diseases both from univariate and disease trajectories analysis.
[truncated: 465 more rows]

[truncated: 1 more sheets: Sup Table S11]
